# Supplementary material for: H3.3-G34 mutations impair DNA repair and promote cGAS/STING-mediated immune responses in pediatric high-grade glioma models
Source: JCI journal article supplement (doi:10.1172/jci154229), 2022-09-20
Supplement: sd1 [file 1]

## 1 **Supplementary Methods, Figures, and Tables**

2

### 3 **S1. Bulk RNA-seq of human and mouse pHGG cells**

4 For mouse pHGG cells, we used 5 pHGG tumors induced de novo using the SB system,  
5 to generate 5 independent H3.3-G34R and 5 independent H3.3-Wt primary cultures,  
6 which we used to perform RNA-seq. For human pHGG cells, four independently  
7 generated stably transfected cultures of SJ-GBM2-H3.3-Wt and three independently  
8 generated stably transfected cultures of SJ-GBM2-H3.3-G34R were used. Biological  
9 replicates were grown in T25 flasks and two million cells were used for RNA purification.  
10 RNA extraction was performed using RNeasy Plus Mini Kit (Qiagen, Cat #74134)  
11 following the manufacturer instructions. Purified RNA (100 ng/sample) were sent for  
12 analysis. RNA quality was assessed using a TapeStation (Agilent Technologies) following  
13 the manufacturer's recommended protocol. RNA sequencing libraries were prepared  
14 according to the TruSeq Stranded Total RNA Human/Mouse/Rat (Illumina) and were  
15 sequenced on the HiSeq 2000 platform.

16 RNA-seq annotation and differential gene expression analysis were performed using  
17 Kallisto [1] (<https://pachterlab.github.io/kallisto>). Kallisto counts and statistical analysis  
18 were used to generate the Volcano plots and heatmaps of relevant gene families. Kallisto  
19 differential analysis results were used to perform Gene set Ontology Analysis. For this,  
20 we generated a ranked list calculating a composed score ( $=\text{Log}_2(\text{Fold}$   
21  $\text{Change}[\text{G34R}/\text{Wt}])/\text{qValue}$ ) for each gene in mouse and human cells. These ranked lists  
22 were used for GSEA using the GSEA v4.1.0 software (Broad Institute, Inc.). Gene

23 ontologies were filtered by False Discovery Rate generated by the GSEA software, for  
24 FDR < 0.05. Gene ontologies from the GSEA analysis were used to generate a gene  
25 ontology network using Cytoscape v3.7.1 [2] with the Enrichment Map plugin [3].

26

## 27 **S2. Analysis of G34R pHGG from patient databases**

28 To analyze the expression of genes belonging to the GO “DNA repair” and the copy  
29 number alterations and point mutations in H3.3-G34R/V pHGG patients, we used the  
30 PedcBioPortal database [4, 5]. Patient samples were selected from a pool of studies  
31 described in Table S4. Patient samples were selected by age (5-40 years), tumor location  
32 (cortical), and glioma grade (grades III/IV); only samples with specified mutation status  
33 on ATRX and P53 were included. The control group consisted of pHGG ATRX mutant,  
34 P53 mutant, and H3.3-Wt, whereas the G34R group consisted of ATRX mutant, P53  
35 mutant, and H3.3-G34R/V. Within these groups, we interrogated for mutation counts and  
36 copy number alterations in the samples whose genomes were sequenced and for the  
37 normalized expression values of DNA repair GO genes expression on the samples where  
38 RNA-seq data was available. Z-scores were used to compare RNA expression values  
39 among different studies. The expression of each DNA repair gene within the Wt and G34R  
40 groups was compared using unpaired t-tests on the whole dataset which allowed to  
41 calculate the false discovery rate (FDR) values for each gene. The frequency of copy  
42 number alterations and mutations in G34R and Wt groups were compared with Two-way  
43 ANOVA analysis using GraphPad Prism 7.

44

### 45 **S3. Immunohistochemistry (IHC) of paraffin-embedded brains**

46 Following perfusion, mouse brains were fixed in 4% PFA (paraformaldehyde) for an  
47 additional 48 hours at 4°C, then transferred to 70% ethanol, and processed and  
48 embedded in paraffin at the University of Michigan Microscopy & Image Analysis Core  
49 Facility using a Leica ASP 300 paraffin tissue processor/Tissue-Tek paraffin tissue  
50 embedding station (Leica). Tissue was sectioned using a rotary microtome (Leica) set to  
51 5 µm in the z-direction. Antigen retrieval and immunohistochemistry (IHC) of paraffin-  
52 embedded sections was performed using antibodies and dilutions listed in Table S1.  
53 Images were obtained using brightfield/epifluorescence (Zeiss Axioplan2, Carl Zeiss  
54 MicroImaging) or laser scanning confocal microscopy (Leica DMIRE2, Leica  
55 Microsystems) and analyzed using LSM5 software (Carl Zeiss MicroImaging).  
56 Immunostaining was performed using the Discovery XT processor (Ventana Medical  
57 Systems). Tissue sections were blocked for 30 minutes in 10% normal goat serum and  
58 2% BSA in PBS. Sections were incubated for five hours with 0.1 µg/mL of rabbit polyclonal  
59 anti-G34R (Revmab, 31-1120-00-S) or anti-ATRX (Abcam, ab97508) antibodies. Tissue  
60 sections were then incubated for 60 minutes with biotinylated goat anti-rabbit IgG (Vector  
61 Laboratories, PK-6101) at 1:200 dilution. Blocker D, Streptavidin-HRP, and DAB  
62 detection kit (Ventana Medical Systems, 760-124) were used according to the  
63 manufacturer's instructions. For automated scoring, each slide was scanned using an  
64 Aperio Scanscope Scanner (Aperio) and viewed through Aperio ImageScope software. A  
65 blinded individual (M.H) captured three randomly selected TIFF images from each slide  
66 at 10 X magnification on the Aperio ImageScope viewing program. Quantification of  
67 immunostaining on each image was conducted using ImageJ. The algorithm used color

68 segmentation with RGB color differentiation, K-Means Clustering, and background  
69 foreground separation with Otsu's thresholding. To arrive at a score for each marker, the  
70 number of extracted pixels was multiplied by their average intensity for each core.

71

#### 72 **S4. Limited dilution assay**

73 H3.3-G34R and H3.3-Wt human pHGG cells were plated in 96-well plates at 1, 2, 4, 8,  
74 16, 32, 64 and 128 cells/well/200  $\mu$ L of the corresponding media (see methods 2 and 3).  
75 The number of wells containing live cells was evaluated after one week. LDA assay  
76 analysis was performed with software available at <http://bioinf.wehi.edu.au/software/elda/>  
77 (44).

78

#### 79 **S5. Evaluation of Tumor Initiating Cell (TIC) frequency *in vivo***

80 To determine the tumor initiation capacity of H3.3-Wt and H3.3-G34R pHGG cells, 6- to  
81 8-week-old C57BL/6J mice were stereotactically injected with 30, 100, 300, 1,000, 3,000,  
82 10,000, 30,000 and 100,000 cells in the striatum in the following coordinates from  
83 bregma: 1.0 mm anterior; 2.0 mm lateral, and 3.0 mm deep). When the mice became  
84 symptomatic (lethargic, scruffy coat, hunched posture) due to tumor burden, they were  
85 anesthetized using 120 mg/kg of ketamine combined with 0.5 mg/kg of dexmedetomidine  
86 and then perfused with 4% PFA.

87

#### 88 **S6. Clonogenic assays**



89 Mouse and human H3.3-G34R and H3.3-Wt pHGG cells were seeded into T25-well plates  
90 at a density of  $10 \times 10^6$  cells per flask in DMEM:F12 (1:1) medium supplemented with  
91 20% fetal bovine serum (Biowest, Cat. # 1520) (for mouse cells, 20% FBS was used  
92 instead of the defined media with B27 and N2 supplements to induce cell adherence to  
93 the flask surface), or in IMDM (Gibco, Cat # 12440061) supplemented with 20% FBS  
94 (Biowest, Cat. # 1520), and penicillin-streptomycin (100 U/mL) for human cells. After  
95 being incubated for 24 hours, the cells were treated with different doses of IR (mouse  
96 cells: 0, 2, 3, and 5 Gy; human cells: 0, 2, 5, and 10 Gy). Immediately after irradiation, the  
97 cells were detached, serially diluted, and seeded (cell numbers ranging from 100 to  
98 100,000 cells per well depending on cell line and radiation dose) in triplicates into 6-well  
99 plates and then placed in an incubator at 37°C set at 5% CO<sub>2</sub> for ten days to allow colony  
100 formation. The plates were then washed with PBS, and each well was fixed with  
101 glutaraldehyde (6.0% v/v), with crystal violet (0.5% w/v) to stain [6]. After washing and  
102 drying the plates, stained colonies with a cell number >50 were counted using a bright  
103 field microscope. The survival fraction was calculated relative to non-irradiated cells.

104 The same procedure was followed to assess the response of H3.3-G34R/Wt pHGG cells  
105 to temozolomide (TMZ). In that case, cells were irradiated, plated, and TMZ was added  
106 at the concentrations indicated in the figure (0;0.002;0.02 and 0.2 M TMZ).

107 The results were all normalized to non-treated controls, to subtract the efficiency of plating  
108 of each cell from the experiment, and only assess the differences owed to the irradiation.  
109 200 non irradiated cells were plated, and the plating efficiency factor was calculated as  
110 [#colonies obtained/#cells plated] in the non-treated plates for each cell type. Cells were  
111 irradiated or TMZ added, counted and plated in triplicates with 3 different plating cell

112 numbers. The survival fraction for each irradiation dose was calculated as [plating  
113 efficiency]/[colonies obtained case plate/cells plated case plate] for each treated plate.

#### 114 **S7. Assessment of DNA repair Activity *in vitro***

115 A previously published DNA repair activity assay based on reporter plasmid was used [7].  
116 This system allows to measure homologous recombination (HR) and non-homologous  
117 end joining (NHEJ) DNA repair activities independently [7-9]. These systems are  
118 designed to express enhanced green fluorescent protein (EGFP) when the plasmid is  
119 repaired via HR or NHEJ, respectively. HR and NHEJ plasmids are exhaustively  
120 linearized by digestion with I-SceI endonuclease and transfected into cells. When the  
121 DNA repair machinery repair the linear break via the corresponding DNA repair  
122 mechanism (HR or NHEJ, respectively, for HR and NHEJ plasmids), EGFP expression is  
123 reconstituted. Ten µg of HR and NHEJ plasmids were linearized by I-SceI digestion (50  
124 U, New England BioLabs, R0649L) and purified on a 0.6% agarose Gel. The linearized  
125 digestion product band were excised from the gel and purified with QIAprep Spin Miniprep  
126 Kit columns (Qiagen, Cat. # 27104).

127

#### 128 **S8. Flow cytometry to assess expression of glioma stem cell markers**

129 Cells were collected and detached into single cell suspensions via Accutase (Biolegend,  
130 Cat. # 423201) treatment, counted, and distributed in  $1 \times 10^5$  cells per well in a 96 well  
131 plate. Cells were washed with PBS and Fc-blocked with CD16/CD32 human/mouse  
132 antibodies for 15 minutes in ice. Cells were washed with PBS and stained with mouse  
133 CD44-Alexa Fluor 700 (Biolegend, Cat #103026) 1:200 and CD133-Cy7 (Biolegend, Cat

134 # 141209) 1:200 (mouse cells) or human CD44-FITC (Biolegend 103005) 1:200 and  
135 CD133-Cy7 (Biolegend, Cat # 141209) 1:200 (for human cells) and incubated for 30  
136 minutes on ice, in dark. After that, cells were fixed and permeabilized using the Foxp3  
137 Transcription Factor Staining Buffer Set (ThermoFisher, Cat. # 00-5523-00), according to  
138 the manufacturer instructions, and ALDH-PE/Alexa Fluor 700 (Abcam, Cat # ab209437  
139 or R&D Systems, AAF5869-SP and conjugated after with anti-Goat Alexa Fluor 680,  
140 ThermoFisher Cat. # A-21084) antibody was added. Cells were washed and resuspended  
141 in flow cytometry buffer and run in a BD FACS-Aria II flow cytometer.

142

143 **S9. *In vitro* and *in vivo* DNA-replicating cell frequency and mitotic rate analysis via**  
144 **flow cytometry**

145 EdU was added to in vitro cultured cells at a final concentration of 10  $\mu$ M. Mouse cells  
146 were incubated for 2 hours in presence of Edu, and human cells were incubated for 3  
147 hours. After Edu incubation, cells were collected and detached into single cell  
148 suspensions via Accutase (Biolegend, Cat. # 423201) treatment, counted, and distributed  
149 in  $1 \times 10^5$  cells per well in a 96 well plate. Edu was stained using Click-iT™ EdU Cell  
150 Proliferation Kit for Imaging a Click reaction according to the manufacturer's protocol, and  
151 EDU-stained cells were run in a BD FACS-Aria II flow cytometer.

152 Mice harboring H3.3-Wt or H3.3-G34R SB tumors were injected intraperitoneally with 10  
153 mg/kg EdU three hours before being euthanized. Tumors were dissociated into single cell  
154 suspensions and CD45 cells were labeled with magnetic beads (Miltenyi Biotec, Catalog  
155 # 130-052-301) following the manufacturer's protocol. After 15 minutes of incubation at  
156 4°C, cells were washed and passed through a preconditioned MS column placed in the

157 magnetic field of a MACS Separator. The unlabeled (CD45 negative) cells derived from  
158 dissociated tumors were collected and resuspended in PBS containing 2% FBS for flow  
159 cytometry analysis. To examine the cell cycle properties of the tumors, cells were fixed,  
160 permeabilized, and stained for pH3 (Ser10) (1: 50, Thermofisher, PA5-17869) and a click  
161 reaction was performed to detect EdU following the manufacturer's instructions (C10418,  
162 Thermofisher). Stained cells were run in a BD FACS-Aria II flow cytometer.

163

#### 164 **S10. Immunofluorescence (IF) of *in vitro*-cultured cells,**

165 For adherent cells (human SJGBM-derived pHGG cells), we placed sterilized round-  
166 shaped coverslips into 24-well plates (1 coverslip per well), and we seeded  $2 \times 10^4$  cells  
167 per well in 0.5 mL of media. For floating cells (mouse primary pHGG cells),  $2 \times 10^5$  cells  
168 per well in 6-well plates in two mL of media were plated. One day after plating, cells were  
169 irradiated (IR, 3 Gy), and collected at the indicated time post-IR. At the time of collection,  
170 for adherent cells, cells were washed twice with PBS and 300-400  $\mu$ L of buffered 3%  
171 formaldehyde fixative solution were added to each well and cells were incubated at room  
172 temperature for 20 minutes. For floating cells, the media with cells was collected and  
173 loaded into a cytopspin cassette and were centrifuged at 500 RPM for ten minutes in  
174 Cytocentrifuge (Thermo, Cytospin 4) to concentrate the cells in a slide. Afterwards, slides  
175 were washed twice with PBS and buffered 3% Formaldehyde Fixative solution was added  
176 on top of each slide and then incubated at room temperature for 20 minutes. Following  
177 fixation, the subsequent steps of the protocol are the same for adherent and floating cells.  
178 Wells/slides were washed twice with PBS and, after, washed twice with 400  $\mu$ L of wash  
179 buffer (0.1% BSA in 1X PBS). Next, cells wells/slides were blocked for non-specific

180 staining with 400  $\mu$ L of blocking buffer (10% normal horse serum, 0.3% Triton X-100) for  
181 45 minutes at room temperature. Following blocking, samples were incubated with  
182 primary antibody prepared in dilution buffer (1% BSA, 1% normal horse serum, 0.3%  
183 Triton) for one hour at room temperature. Wells/slides were washed twice with 400  $\mu$ L of  
184 wash buffer (0.1% BSA in 1X PBS), and incubated with fluorescent-conjugated secondary  
185 antibodies, for one hour at room temperature in dark. After, wells/slides were washed  
186 twice with 400  $\mu$ L of wash buffer (0.1% BSA in 1X PBS) and stained with 300  $\mu$ L DAPI  
187 solution (1:5000 of a 14.3 mM DAPI stock solution) for two minutes, rinsed with PBS and  
188 mounted with ProLong™ Gold Antifade Mountant (ThermoFisher, Cat. # P36930). Slides  
189 were imaged after 24 hours using an Olympus BX53 microscope and cellSens Dimension  
190 software (Olympus).

191

## 192 **S11. Confocal microscopy and image analysis**

193 Cell were placed into the incubator chamber of the microscope at 37°C with a 5% CO<sub>2</sub>  
194 atmosphere. Microscopy confocal images were acquired using a single photon laser  
195 scanning inverted confocal microscope LSM 880 AxioObserver (Carl Zeiss, Jena,  
196 Germany). Two laser lines were used for simultaneous excitation with Plan-apochromat  
197 63 x/1.4 numerical aperture (NA) oil DIC M27 objective. Cells stained with Hoechst33342  
198 were excited at 361 nm and 497 nm wavelength respectively. Line-sequential scan mode  
199 and 1.4 scan zoom were used. The system was driven by ZEN Black software.  
200 Multichannel immunofluorescence images were processed and analyzed using Fiji  
201 (ImageJ2). Micronuclei were manually identified and quantified using the plugging Cell  
202 Counter.

## 203 **S12. Western Blotting**

204 For each experimental point, mouse and human H3.3-Wt and H3.3-G34R pHGG cells  
205 were seeded at density of  $3.0 \times 10^6$  cells into one 75-cm<sup>2</sup>. After 24 hours, cells were  
206 treated with IR (3 Gy). Cell lysates were generated by collecting cells at different time  
207 points post IR by incubating glioma cells and 0.2 mL RIPA lysis buffer (ThermoFisher,  
208 Catalog # 89900) containing protease inhibitors (ThermoFisher, Halt™ Protease and  
209 Phosphatase Inhibitor Cocktail (100X), Catalog # PI78440) on ice for five minutes.  
210 Resulting cell lysates were centrifuged at (13,000 RPM, 10', 4°C) and supernatants were  
211 collected. Protein concentration was determined via bicinchoninic acid assay (BCA) (Assay  
212 Kit Pierce BCA, Cat # PI23227, Thermo Scientific). For electrophoretic separation of  
213 proteins, 20 µg of total protein were resuspended in loading buffer (10% sodium dodecyl  
214 sulfate Sigma Aldrich 71736, 20% glycerol, and 0.1% bromophenol blue) incubated five  
215 minutes at 95°C and loaded onto a 4-12% Bis-Tris gel. Proteins from the gel were  
216 transferred to 0.2 µm nitrocellulose membrane and blocked with 5% nonfat milk in TBS-  
217 0.1% Tween-20. After blocking, membranes were incubated with primary antibodies  
218 overnight at 4°C. The next day, blots were washed with TBS-0.1% Tween-20 and  
219 incubated with secondary (1:4000) antibody for one hour at room temperature. Blots were  
220 washed several times again with TBS-0.1% tween-20 and visualized under Biorad gel  
221 imaging software. Band intensities were quantified using GelAnalyzer software. For  
222 Western blots involving histone marks,  $5 \times 10^7$  cells were processed for histone extraction  
223 with the Histone Extraction Kit from Active Motif (Catalog # 40028) following the  
224 manufacturer protocol. 10 µg of histone extract were used per sample for each Western

225 blot experiment. A list of the antibodies used for WB and other experiments is provided  
226 in Table S8.

227 In the case of the DNA repair WB experiments, all the WB represented in Figure 6 (DNA  
228 damage response proteins) were performed using the same protein extracts. Cells were  
229 irradiated, and upon protein extraction, extracts were quantified via BCA assay, and the  
230 concentrations were normalized to 1.5  $\mu\text{g}/\mu\text{l}$ , aliquoted into 15  $\mu\text{l}$  aliquots and stored at -  
231 80oC. WB was performed for each DNA repair protein using an aliquot of each protein  
232 extract (corresponding to a time post-IR) per WB. For each WB, corresponding to a  
233 different DNA repair phospho-mark or total protein, a loading control protein was used,  
234 which was either actin or vinculin, depending on the molecular weight of the DNA repair  
235 protein developed. As the protein extracts used throughout all the WB in these  
236 experiments were the same for each experimental time point and cell type, we included  
237 only one representative Actin loading control in the figure.

### 238 **S13. Micrococcal nuclease digestion assay**

239 For the micrococcal nuclease digestion assay, nuclei were prepared by resuspending cell  
240 pellets in Nuclear Buffer A (85 mM KCl, 10 mM Tris-HCl, 0.2 mM spermidine, 0.2 mM  
241 EDTA, 160 mM sucrose, 250  $\mu\text{M}$  phenylmethylsulfonyl fluoride) and then adding five mL  
242 of Nuclear Buffer B (Nuclear Buffer A supplemented with NP-40 0.1% vol/vol), mixing by  
243 inversion, and incubating ten minutes on ice to ensure complete lysis. Nuclei were  
244 collected via centrifugation (1,300 g, 5', 4°C) and then resuspended in five mL Mnase  
245 digestion buffer (50 mM Tris-HCl: pH 8.0, 1 mM  $\text{CaCl}_2$ , 0.2 % Triton X-100). To remove  
246 cellular debris, nuclei were passed through 7.5 mL of chilled sucrose cushion (10 mM  
247 HEPES: pH 7.9, 30% (w/v) sucrose, 1.5 mM  $\text{MgCl}_2$ ) and collected via centrifugation

248 (1300 g, 12', 4°C, swinging bucket tabletop). The homogenized nuclei were re-suspended  
249 in 600 µL of Mnase digestion buffer, and the absorbance at 260 nm was recorded using  
250 a nanodrop (NanoDrop OneC, Thermo). The concentration of nuclear DNA was adjusted  
251 to four absorbance units using MNase digestion buffer. Then the DNA extracts were  
252 divided in six microcentrifuge tubes, and 50 U/mL Mnase (Worthington, 9013-53-0) was  
253 added to each tube. The reaction was stopped 1, 2, 4, 8, 16, or 32 minutes after the  
254 addition of Mnase by using 300 µL of Mnase Stop Buffer (2% SDS, 200 µg/mL proteinase  
255 K, and 10 mM EDTA). Purified DNA was fractionated on a 1% agarose gel in the presence  
256 of an intercalating dye (SYBR Safe). Gel images were analyzed using GelAnalyzer 19.1  
257 ([www.gelanalyzer.com](http://www.gelanalyzer.com)) by Istvan Lazar Jr., PhD and Istvan Lazar Sr., PhD, CSc, and the  
258 percentage of mononucleosomes was calculated using densitometry analysis.

259

#### 260 **S14. Chromatin relaxation to assess DNA repair activity in human and mouse** 261 **pHGG cells**

262 To assess the effect of chromatin relaxation in DNA repair kinetics,  $1 \times 10^6$  mouse or  
263 human cells were seeded in 25 cm<sup>2</sup> tissue culture flasks (eight flasks per experiment per  
264 cell type). Chromatin relaxation was induced by subjecting the cells to hypotonic  
265 conditions, as previously reported [10, 11]. Six flasks were irradiated (five Gy ionizing  
266 radiation, IR), and immediately after irradiation, half were subjected to hypotonic  
267 conditions, by diluting the osmolarity to 75 mM with one volume of ultrapure sterile H<sub>2</sub>O.  
268 The remaining half were maintained in isotonic conditions, by dilution with one volume of  
269 sterile 150 mM NaCl solution. One flask of cells per treatment condition (*i.e.*, hypotonic  
270 or isotonic conditions) was collected per each time post-IR time point assessed. Non-



271 irradiated flasks were subjected to either hypotonic or isotonic conditions for 24 hours and  
272 collected as non-IR controls. Floating mouse cells were collected by centrifugation and  
273 adherent human cells were collected by scraping and washing with PBS (ThermoFisher,  
274 Catalog #10010-023). Cell pellets were resuspended in 100  $\mu$ L of RIPA buffer  
275 (ThermoFisher, Catalog # 89900) containing protease and phosphatase inhibitors and  
276 processed for Western blot as detailed in method S12).

277

278 **S15. *In vitro* Dose-Response evaluation of DNA damage response inhibitors and to**  
279 **temozolomide (TMZ)**

280 We assessed the susceptibility of H3.3-G34R and H3.3-Wt mouse and human cells to  
281 DDRi. We evaluated a novel PARP inhibitor, Pamiparib (BGB-290) and a cell cycle  
282 checkpoint (Chk1/2) inhibitor. We plated  $2 \times 10^3$  mouse or human cells per well on 96-well  
283 plates in 190  $\mu$ L of media. We used five wells per inhibitor dose evaluated for each cell  
284 type. We evaluated seven concentrations of inhibitor in serial logarithmic dilutions (e.g.,  
285 1  $\mu$ M, 3  $\mu$ M, 10  $\mu$ M, 30  $\mu$ M, 100  $\mu$ M and 300  $\mu$ M). One day after plating the cells 10  $\mu$ L of  
286 20X concentrated inhibitor was added to each well for each dilution evaluated. Cells were  
287 incubated for three days, and viability was assessed using CellTiter Glo assay (Promega,  
288 Cat. # G7572). Additionally, we assessed cell survival combining DDRi with IR (two Gy).  
289 In those cases, cells were irradiated one hour before the addition of the DDRi. The results  
290 were evaluated with GraphPad Prism 7 using a sigmoidal regression model, which allows  
291 the IC<sub>50</sub> calculation and the evaluation of the statistical differences of the curves between  
292 cells. In the case of the experiment comparing endogenous histone-Wt and histone-

293 mutant pHGG primary human cells (Figure S19, C-D), SJ-GBM2 cells (H3.3-Wt  
294 endogenous) and OPBG-GBM-001 (H3.3-G34R) cells were used.

295

## 296 **S16. Neutral Comet Assay**

297 Neutral Comet assay [12] was performed on mouse and human pHGG cells according to  
298 the protocol detailed in [13]. Cell were seeded at a density of  $3.0 \times 10^6$  cells into five mL  
299 of media in a T25 flask and subjected to three Gy of IR. Cells were collected four hours  
300 after radiation, and  $2 \times 10^5$  cells were embedded in 200  $\mu$ L of 0.7% low melting Agarose  
301 ant 38°C and plated over 0.8% low melting point agarose (Sigma-Aldrich, Cat. # A9414)  
302 pre-coated microscope slides and covered with coverslips. Agarose was allowed to  
303 solidify at 4°C for 15 minutes, then topped with an agarose layer of (80  $\mu$ L 0.8 %, 38°C),  
304 and slides were covered with coverslips again. After solidification of the top agarose layer,  
305 coverslips were removed, and slides were placed on Neutral Comet lysis solution  
306 overnight at 4°C. On the following day, slides were washed and subjected to  
307 electrophoresis (0.5 V/cm during 1 h). Each slide was developed by adding 100  $\mu$ L of  
308 SYBR Safe DNA Gel Stain (ThermoFisher, Cat. # S33102), diluted 1:1000, and covered  
309 with coverslip for imaging. We counted 5 cells per microscope field, and we used 4 fields  
310 belonging to independent experimental replicates.

311

## 312 **S17. Posttranslational modifications Phospho-Array**

313 To assess the levels of posttranslational activation of DNA repair and cell cycle proteins,  
314 we used an antibody array (Cell Cycle Control Phospho Antibody Array, Cat. # PCC238

315 FullMoon BioSystems) encompassing 238 site-specific and phospho-specific antibodies  
316 involved in cell cycle regulation and DNA damage response/repair mechanisms. Protein  
317 was extracted from  $2 \times 10^6$  cells for each cell type (Human and Mouse H3.3-Wt and  
318 H3.3G34R pHGG cells, respectively), following the protocol from Antibody Array Assay  
319 Kit (FullMoon BioSystems, Cat. # KAS02). After purification, proteins were quantified by  
320 BCA assay (Assay Kit Pierce BCA, Cat # PI23227, Thermo Scientific) according to the  
321 manufacturer instructions, and 100  $\mu$ g of protein per cell type were biotinylated according  
322 to the protocol from Antibody Array Assay Kit (FullMoon BioSystems, Cat. # KAS02).  
323 Antibody array slides were blocked, and biotinylated proteins were coupled to the arrays  
324 following (Cell Cycle Control Phospho Antibody Array, Cat # PCC238 FullMoon  
325 BioSystems) instructions. After protein coupling and washing, the biotinylated proteins  
326 that bound the antibodies spots on the array were stained with Cy3-streptavidin according  
327 to the manufacturer instructions, and the arrays were developed with a Genepix 4100A  
328 Microarray Scanner (UMICH Single Cell Analysis Resource Core). Images were analyzed  
329 using **ImageJ** software [14, 15], and spots were quantified into intensity values using the  
330 Plugin **Protein Array Analyzer** for ImageJ [16]. Each value was normalized by dividing  
331 by the Actin average intensity, and each phospho-specific mark was normalized to each  
332 corresponding total antibody average intensity. As the array provides six spots for each  
333 site-specific and phospho-specific antibody, the analysis resulted in six normalized  
334 intensity values per protein-specific and phospho-specific mark. The values were  
335 analyzed in GraphPad Prism 7, and Unpaired T-tests were performed to compare  
336 individual protein and phospho-site intensity between H3.3-G34R and H3.3-Wt, providing  
337 Significance Statistical analyses (False discovery rates) and Fold changes for each

338 protein and phospho-site mark between H3.3-G34R and H3.3-Wt mouse and human cells,  
339 respectively. The NES (normalized enrichment score) was determined using the Gene  
340 Ontology Set Analysis (GSEA) software from the Broad Institute  
341 (<https://doi.org/10.1073/pnas.0506580102>). The NES represents the deviation of the  
342 genes/mark on the signature toward being upregulated or downregulated, and an NES of  
343 0 indicates that the genes/mark belonging to the signature are neither upregulated nor  
344 downregulated in comparison with the average of all the genes/marks. A negative NES  
345 indicates downregulation of the signature.

346

#### 347 **S18. Determination of micronuclei frequency**

348 To access the micronuclei, cells ( $1 \times 10^5$ ) were placed on glass chambered coverslip and  
349 incubated overnight. Following incubation within the optimum growth condition, half of the  
350 cells were irradiated (3 Gy IR) while the rest were left as non-IR samples. After 72 hours  
351 the cells were harvested, and DNA was labelled with Hoechst 33342 dye 5  $\mu$ M  
352 (ThermoFisher Catalog # H3570) for 20 minutes. Cells were subsequently rinsed with  
353 HBSS and placed in fresh growth medium before analysis through confocal microscopy.  
354 Micronuclei were defined as discrete DNA aggregates separated from the primary  
355 nucleus in cells where interphase primary nuclear morphology was normal. Cells with an  
356 apoptotic appearance were excluded.

357

#### 358 **S19. Determination of Type I Interferon levels and DAMPs**

359 To evaluate the levels of type I interferons and DAMPs, mouse and human pHGG cells  
360 ( $1 \times 10^6$ ) were seeded into 6-well plates and allowed to settle overnight before treatment.  
361 On the next day, cells were treated with STING inhibitors: H151 (1  $\mu$ M) and STING-  
362 dependent IRF3 activation inhibitor, GSK690693 (1  $\mu$ M), JSH23, NF- $\kappa$ B activation  
363 inhibitor; and PDTC, NF- $\kappa$ B inhibitor, for two hours prior to receiving three Gy of  
364 irradiation. After 72 hours, the levels of IFN- $\beta$ , HMGB1 and ATP in the cultures'  
365 supernatants were measured by ELISA according to manufacturer's instructions (R&D)  
366 at the Cancer Center Immunology Core, University of Michigan.

367

## 368 **S20. Transplantable pHGG model**

369 Injections were performed using a stereotactic fixation device (Stoelting). Mice were first  
370 anesthetized with intraperitoneal injections of ketamine (0.1 mg/g) and xylazine (0.01  
371 mg/g). A local injection of bupivacaine was used as analgesic. One microliter of  $5 \times 10^4$   
372 cells in suspension was delivered using a 30-gauge needle attached to a Hamilton  
373 syringe. The location of injection, AP 1.7 mm from bregma, Lat 0.5 mm, and depth 3.5  
374 mm from the dural surface, was determined according to the coordinates in the mouse  
375 brain atlas to target the right frontal striatum. Buprenorphine was administered to mice for  
376 pain relief post-injection. Mice were continually monitored and euthanized when at onset  
377 of visible symptoms of tumor burden (*i.e.*, lethargy, scruffy coat, hunched posture).

378

## 379 **S21. *In vivo* Radio sensitivity study**

380 Male and female C57BL/6 mice (n = 24 total), aged 6-8 weeks, were implanted with 5 x  
381 10<sup>4</sup> H3.3-Wt or H3.3-G34R cells (n = 12 each). We followed an adaptation of RT for  
382 mouse that has been previously optimized for maximum efficacy, and described in Leder  
383 et al., 2014, [17]. In this study, the authors we adopted a combined experimental and  
384 theoretical approach to identify treatment schedules that would lead to better survival in  
385 animal models of glioma, taking in account the dynamic transitions of cells between  
386 relatively radiosensitive and radioresistant pools. At 7 days post-implantation, mice with  
387 each tumor genotype were randomly assigned to: (i) 20 Gy of ionizing radiation (IR), or  
388 (ii) controls without radiation treatment. Sample size was n = 6 for each  
389 genotype/treatment group. Tumor growth was monitored three times per week after  
390 treatment up to a moribund state, at which point the animals were euthanized and  
391 included in the survival curve.

392

### 393 **S22. H3.3-G34R pHGG Rechallenge**

394 Mice implanted with H3.3-G34R pHGG mouse cells that survived with the IR or IR + DDRi  
395 treatments were rechallenged to assess the development of antitumor immunological  
396 memory. Six mice were rechallenged on the contralateral hemisphere (Coordinates of  
397 injection, AP 1.7 mm from bregma, Lat 0.5 mm, and depth 3.5 mm from the dural surface)  
398 with 5x10<sup>4</sup> G34R pHGG mouse cells. Tumor growth was monitored twice a week after  
399 treatment. The experiment was terminated at day 100, the point at which animals were  
400 perfused and tissues were fixed for histological analysis.

401

402 **S23. Inhibition of DNA damage response *In vivo***

403 CHK1/2 inhibitor AZD7762 was dissolved in 0.9% saline containing 11.3% (2-  
404 hydroxypropyl)- $\beta$ -cyclodextrin (Sigma Aldrich, H107-5G) on a magnetic stirrer for 30  
405 minutes and stored at 4°C. PARP inhibitor pamiparib was dissolved in containing 10% (2-  
406 hydroxypropyl)- $\beta$ -cyclodextrin (Sigma Aldrich, H107-5G) on a magnetic stirrer for 30  
407 minutes and stored at 4°C. Veliparib was prepared in 5% DMSO in 0.9% saline and pH  
408 was adjusted to 5.5.

409 Twelve days after tumor implantation, 15 mg/kg of AZD7762, 10 mg/kg of pamiparib or  
410 25 mg/kg veliparib [18] was administered intraperitoneally to mice once a day along with  
411 two Gy radiation five days a week for two weeks. Mice were assessed for survival with  
412 the treatment, tumor growth was monitored by luminescence twice a week, and animals  
413 were euthanized when symptoms of tumor burden were identified.

414 **S24. Pharmacological inhibition or stimulation of the cGAS-STING pathway *in vivo***

415 We performed pharmacological inhibition of STING using H151. H151 was prepared in  
416 PBS with 0.1% Tween-80, and 750 nmol in 200  $\mu$ l of volume were administered daily  
417 intraperitoneally [19]. We performed pharmacological stimulation of the cGAS-STING  
418 pathway using the STING agonist diABZI (Selleckem, Cat. # S8796), which was  
419 resuspended in DMSO to a concentration of 1.25  $\mu$ g/ $\mu$ l. 5  $\mu$ g of diABZI were administered  
420 intracranially in 4  $\mu$ l of volume on the site of the tumor implantation [20], twice at days 13  
421 and 19 post-implantation. As vehicle control, 4  $\mu$ l of DMSO were administered  
422 intracranially on the site of the tumor implantation administration (non-treated group).

423

424

425 **References**

426

- 427 1. Bray, N.L., et al., *Near-optimal probabilistic RNA-seq quantification*. Nat Biotechnol, 2016. **34**(5):  
428 p. 525-7.
- 429 2. Shannon, P., et al., *Cytoscape: a software environment for integrated models of biomolecular*  
430 *interaction networks*. Genome Res, 2003. **13**(11): p. 2498-504.
- 431 3. Merico, D., et al., *Enrichment map: a network-based method for gene-set enrichment*  
432 *visualization and interpretation*. PLoS One, 2010. **5**(11): p. e13984.
- 433 4. Gao, J., et al., *Integrative analysis of complex cancer genomics and clinical profiles using the*  
434 *cBioPortal*. Sci Signal, 2013. **6**(269): p. p1.
- 435 5. Cerami, E., et al., *The cBio Cancer Genomics Portal: An Open Platform for Exploring*  
436 *Multidimensional Cancer Genomics Data*. Cancer Discovery, 2012. **2**(5): p. 401-404.
- 437 6. Franken, N.A.P., et al., *Clonogenic assay of cells in vitro*. Nature Protocols, 2006. **1**(5): p. 2315-  
438 2319.
- 439 7. Seluanov, A., Z. Mao, and V. Gorbunova, *Analysis of DNA double-strand break (DSB) repair in*  
440 *mammalian cells*. J Vis Exp, 2010(43).
- 441 8. Koschmann, C., et al., *ATRX loss promotes tumor growth and impairs nonhomologous end*  
442 *joining DNA repair in glioma*. Sci Transl Med, 2016. **8**(328): p. 328ra28.
- 443 9. Núñez, F.J., et al., *IDH1-R132H acts as a tumor suppressor in glioma via epigenetic up-regulation*  
444 *of the DNA damage response*. Sci Transl Med, 2019. **11**(479).
- 445 10. Murr, R., et al., *Histone acetylation by Trrap-Tip60 modulates loading of repair proteins and*  
446 *repair of DNA double-strand breaks*. Nat Cell Biol, 2006. **8**(1): p. 91-9.
- 447 11. Krieger, M.L., *Global chromatin changes induced by altered tonicity interferes with DNA damage*  
448 *response signaling and DNA double-strand break repair*. PhD Thesis Dissertation, Institute of  
449 Medical Radiation Biology, University of Duisburg-Essen, Germany, Online:  
450 [https://duepublico2.uni-due.de/receive/duepublico\\_mods\\_00047701](https://duepublico2.uni-due.de/receive/duepublico_mods_00047701), 2018.
- 451 12. Courilleau, C., et al., *The chromatin remodeler p400 ATPase facilitates Rad51-mediated repair of*  
452 *DNA double-strand breaks*. J Cell Biol, 2012. **199**(7): p. 1067-81.
- 453 13. Boutet-Robinet, E., D. Trouche, and Y. Canitrot, *Neutral Comet Assay*. Bio-protocol, 2013. **3**(18):  
454 p. e915.
- 455 14. Rasband, W.S., *ImageJ. National Institutes of Health, Bethesda, Maryland, USA.*  
456 <http://imagej.nih.gov/ij>. (1997-2021)
- 457 15. Schneider, C.A., W.S. Rasband, and K.W. Eliceiri, *NIH Image to ImageJ: 25 years of image*  
458 *analysis*. Nat Methods, 2012. **9**(7): p. 671-5.
- 459 16. Carpentier, G. and E. Henault, *Protein Array Analyzer for ImageJ*. Proceedings of the ImageJ User  
460 and Developer Conference, Centre de Recherche Public Henri Tudor, ed., (ISBN 2-919941- 11-9),  
461 pp. 238-240, 2010.
- 462 17. Leder, K., et al., *Mathematical modeling of PDGF-driven glioblastoma reveals optimized*  
463 *radiation dosing schedules*. Cell, 2014. **156**(3): p. 603-616.
- 464 18. Owonikoko, T.K., et al., *Poly (ADP) ribose polymerase enzyme inhibitor, veliparib, potentiates*  
465 *chemotherapy and radiation in vitro and in vivo in small cell lung cancer*. Cancer Med, 2014.  
466 **3**(6): p. 1579-94.
- 467 19. Haag, S.M., et al., *Targeting STING with covalent small-molecule inhibitors*. Nature, 2018.  
468 **559**(7713): p. 269-273.
- 469 20. Ramanjulu, J.M., et al., *Design of amidobenzimidazole STING receptor agonists with systemic*  
470 *activity*. Nature, 2018. **564**(7736): p. 439-443.



# Supplementary Figure 1

## A H3.3-G34R staining

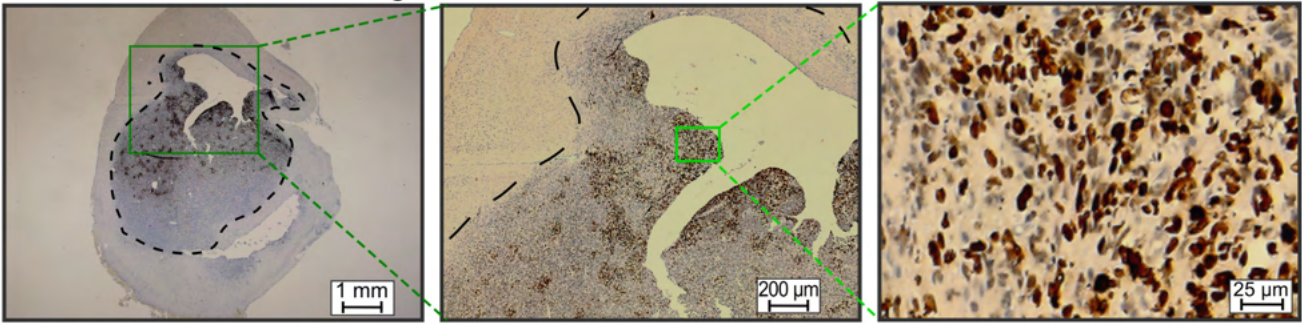

## B ATRX staining

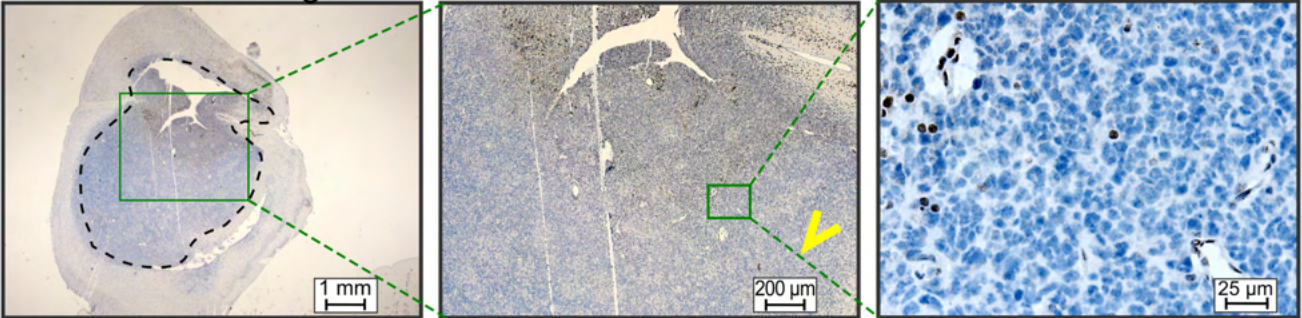

## Histology (Hematoxylin/Eosin staining)

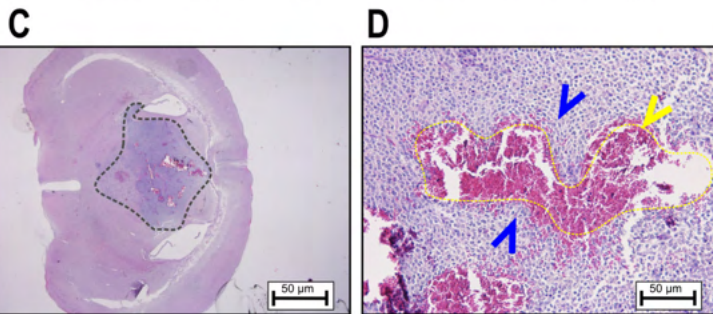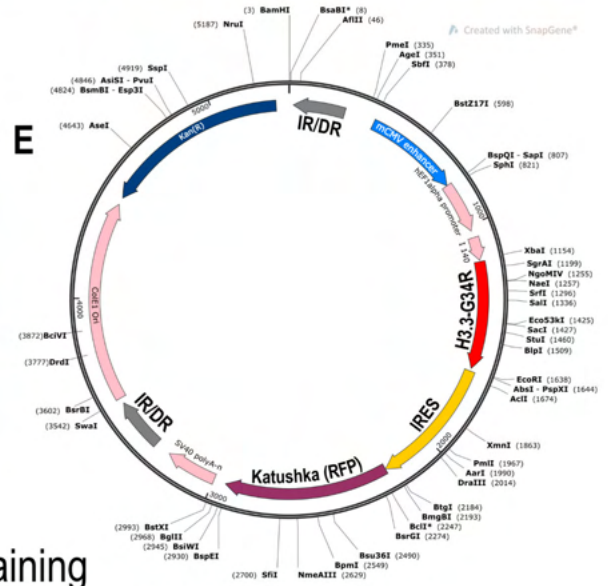

## E

### H3.3-G34R staining

H3.3-G34R patient pGG      H3.3-Wt patient pGG

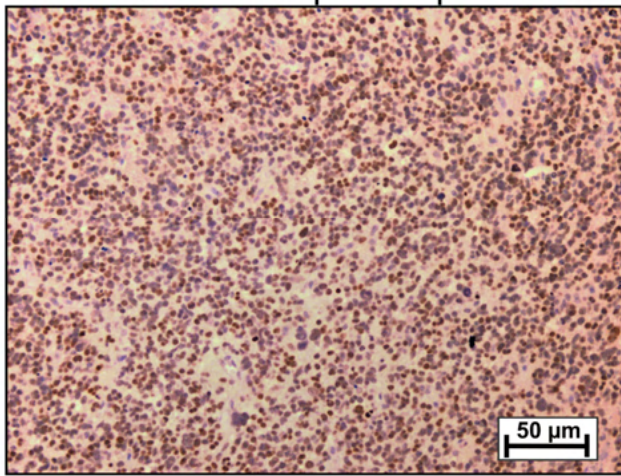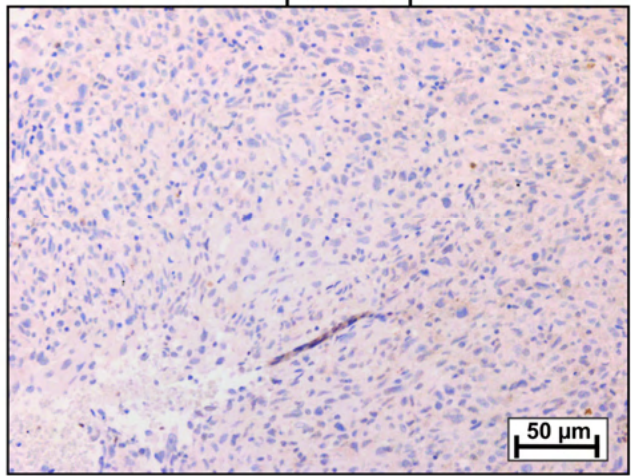

500 **Figure S1.**

501 **A)** Immunohistochemistry of a H3.3-G34R GEMM of pHGG showing the heterogeneous  
502 expression of the mutant histone in the tumor. **B)** Immunohistochemistry of a H3.3-G34R  
503 GEMM of pHGG showing the downregulation of ATRX expression in the tumor. **C-D)**  
504 Hematoxylin and Eosin staining of a *de novo* GEMM of H3.3-G34R pHGG depicting  
505 characteristics of a high-grade glioma, such as necrotic areas with hemorrhages (Yellow  
506 arrow) and palisades around the necrotic areas (Blue arrows). **E)** Map of the transposable  
507 plasmid used to integrate the H3.3-G34R expression cassette into brain cells. **F)**  
508 Immunohistochemistry of a H3.3-G34R pHGG patient-derived biopsied sample of  
509 showing the heterogenous expression of the mutant histone in the tumor (right), and  
510 comparison with a H3.3-Wt pHGG patient-derived biopsied sample (left).

511

512

513

514

515

516

517

518

519

520

521

522

523

524

525



## Supplementary Figure 2

### pERK (MAPK p44/42) IHC staining

#### H3.3-G34R *de novo* pHGG

A

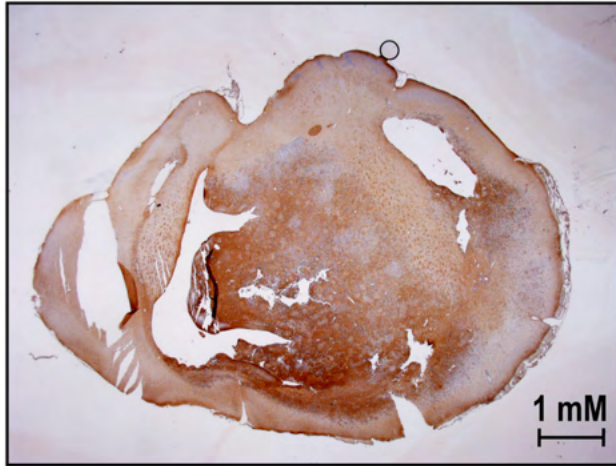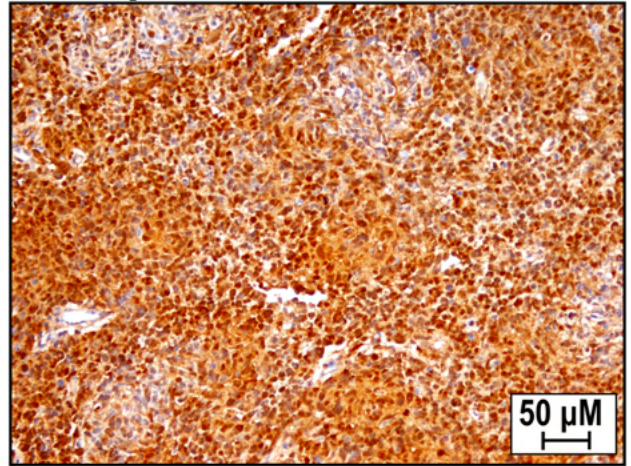

B

#### H3.3-Wt *de novo* pHGG

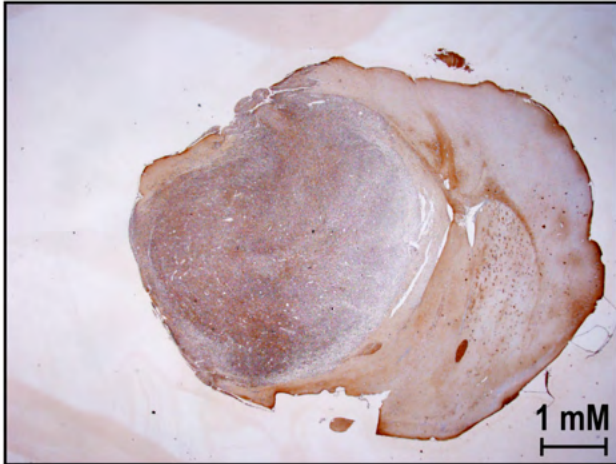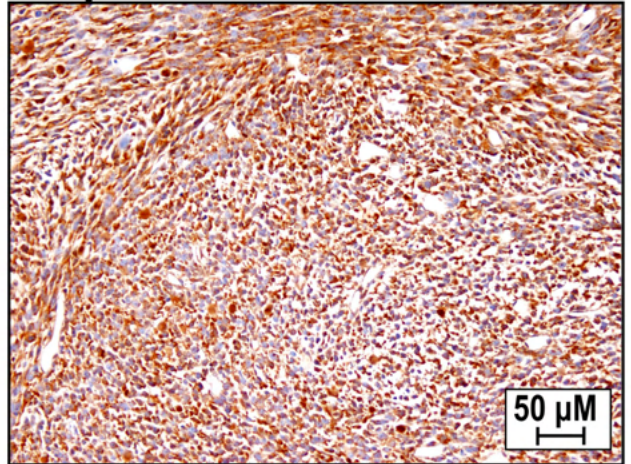

C

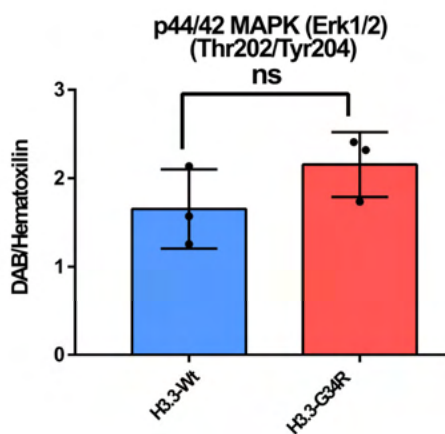

D

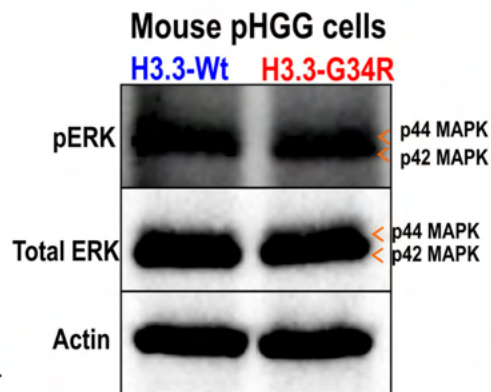

E

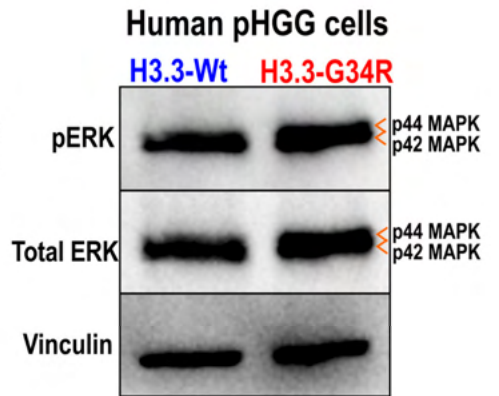

554 **Figure S2**

555

556 **A-C**), IHC staining of pERK in H3.3-G34R **(A)** and H3.3-Wt **(B)** pHGG de novo mouse  
557 pHGG, and quantification of the results **(C)**. **(D-E)** Evaluation of pERK levels in mouse  
558 **(D)** and human **(E)** pHGG cells through Western blotting. (*ns* = *non-significant; unpaired*  
559 *t test. Data represent mean ± SD of three different field of views*)

560

561

562

563

564

565

566

567

568

569

570

571

572

573

574

575

576

577

578

579



# Supplementary Figure 3

Mouse H3.3-Wt

Mouse H3.3-G34R

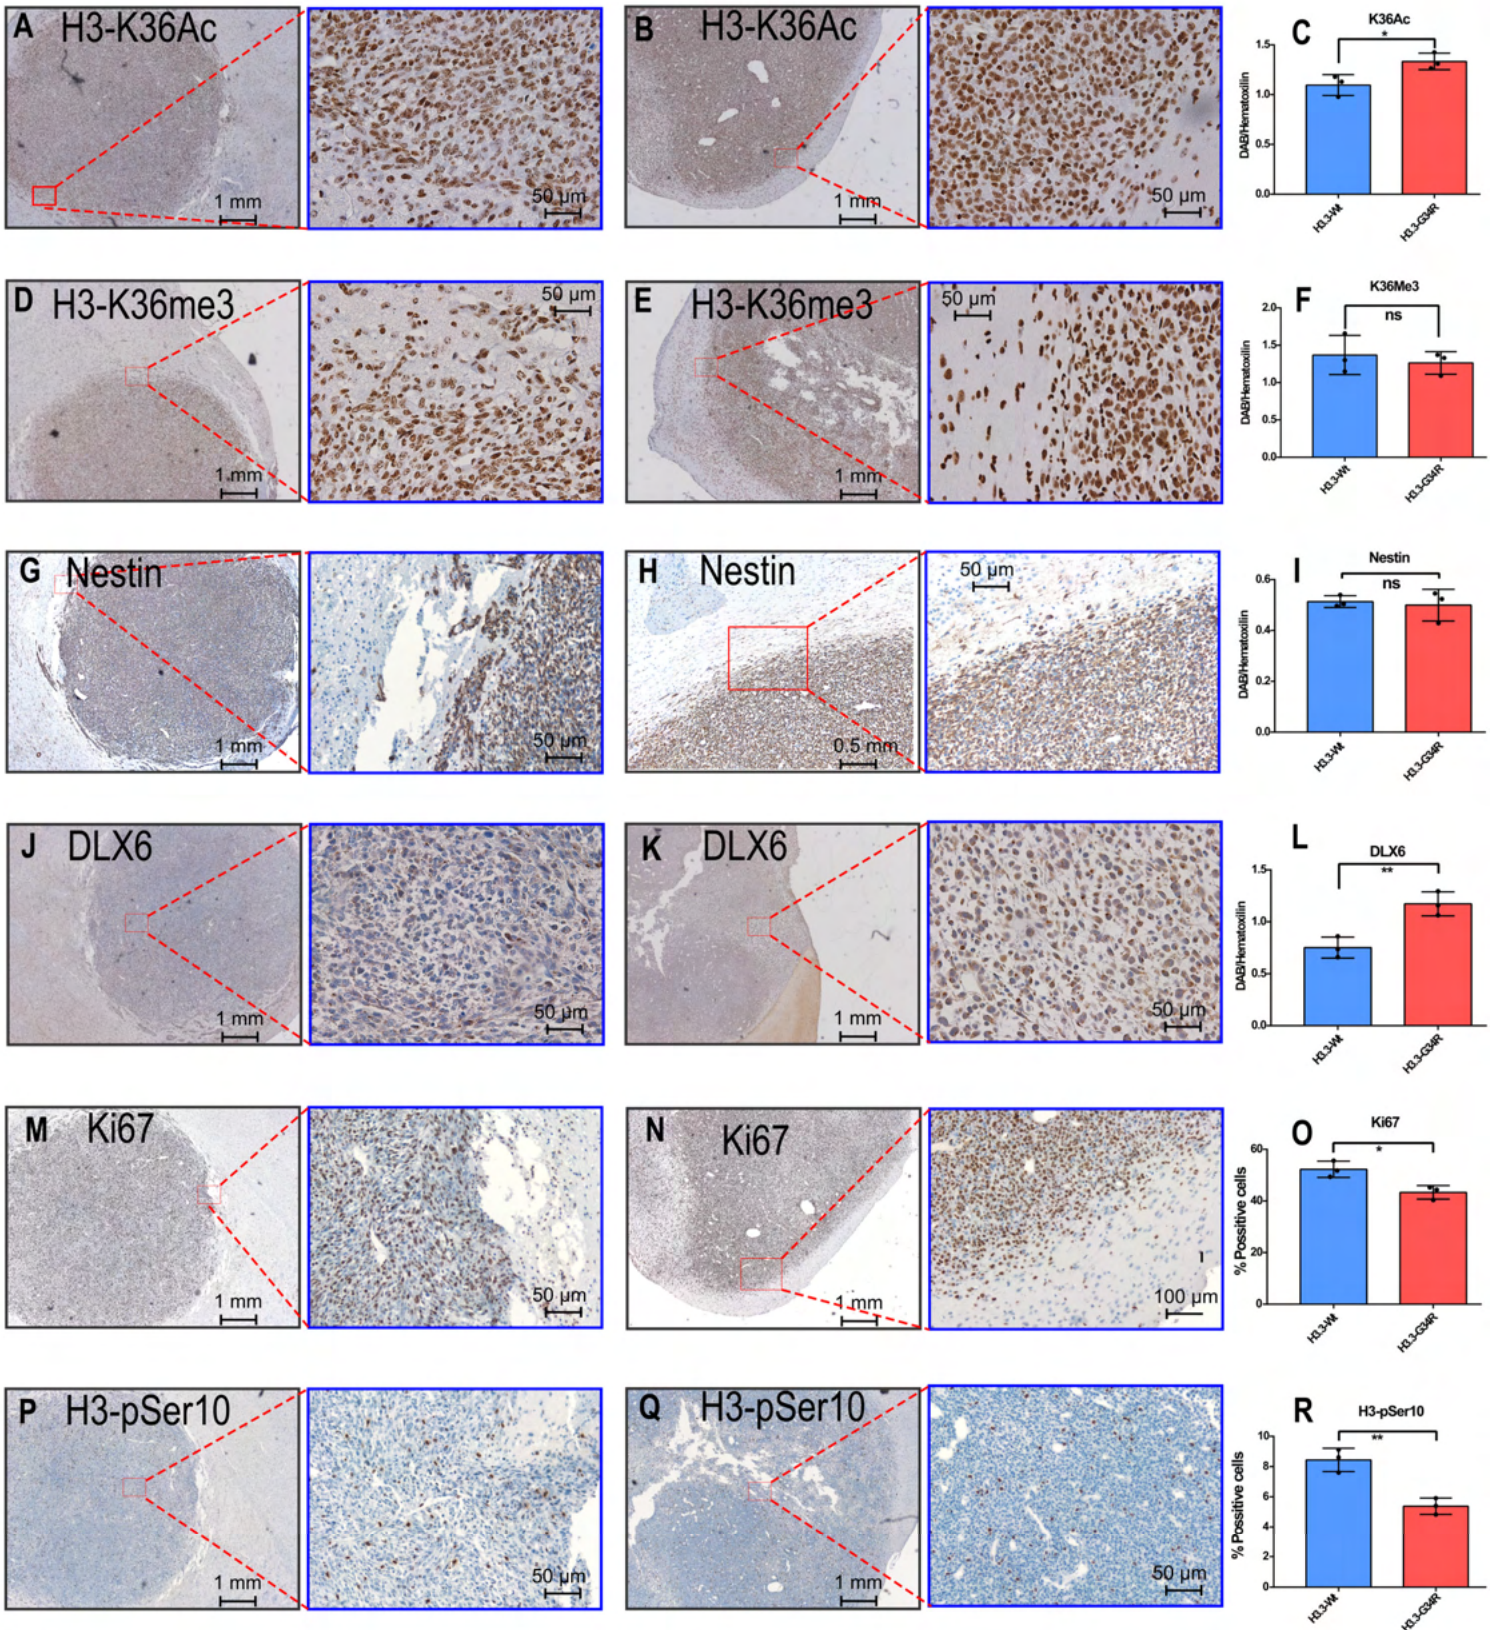

609

610 **Figure S3**

611 Immunohistochemistry of H3.3-G34R and H3.3-Wt GEMM of pHGG showing the  
612 expression and quantification of K36Ac (**A-C**), K6me3 (**D-F**), Nestin (**G-I**), DLX6 (**J, L**),  
613 KI67 (**M-O**), and Histone3 pospho-serine10 (**P, R**). (\* $p < 0.05$ , \*\* $p < 0.01$ , \*\*\* $p < 0.005$ ,  
614 \*\*\*\* $p < 0.001$ ; unpaired *t* test. Data represent mean  $\pm$  SD of three different field of views)

615

616

617

618

619

620

621

622

623

624

625

626

627

628

629

630

631

632

633

634



# Supplementary Figure 4

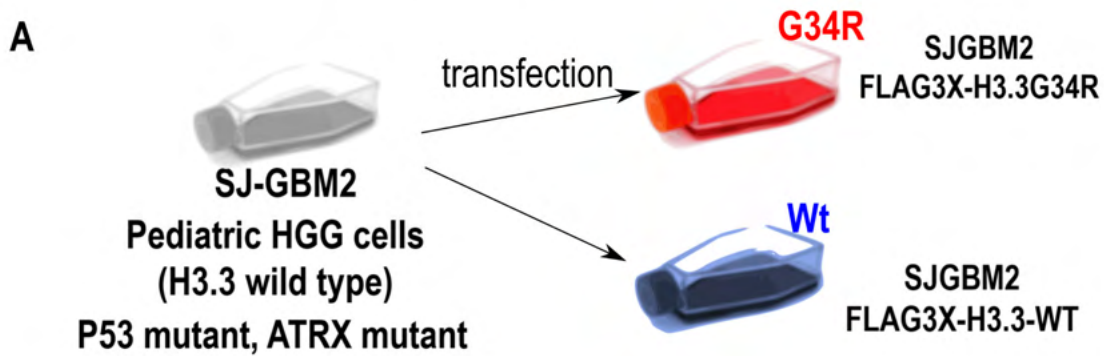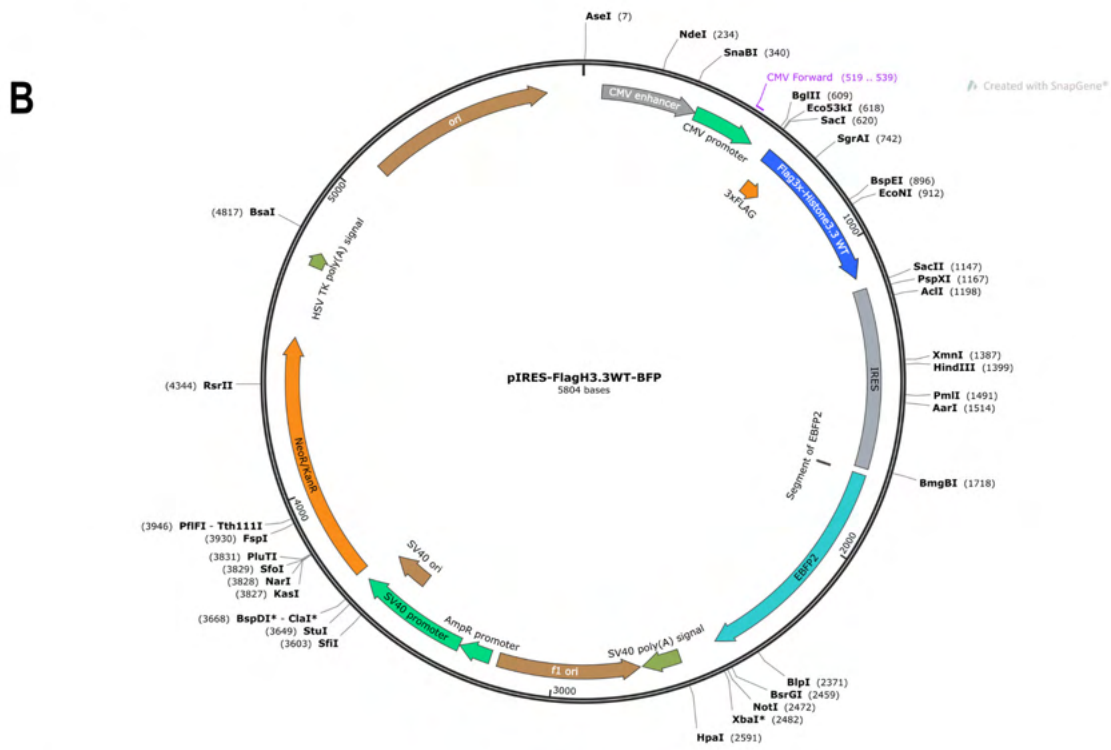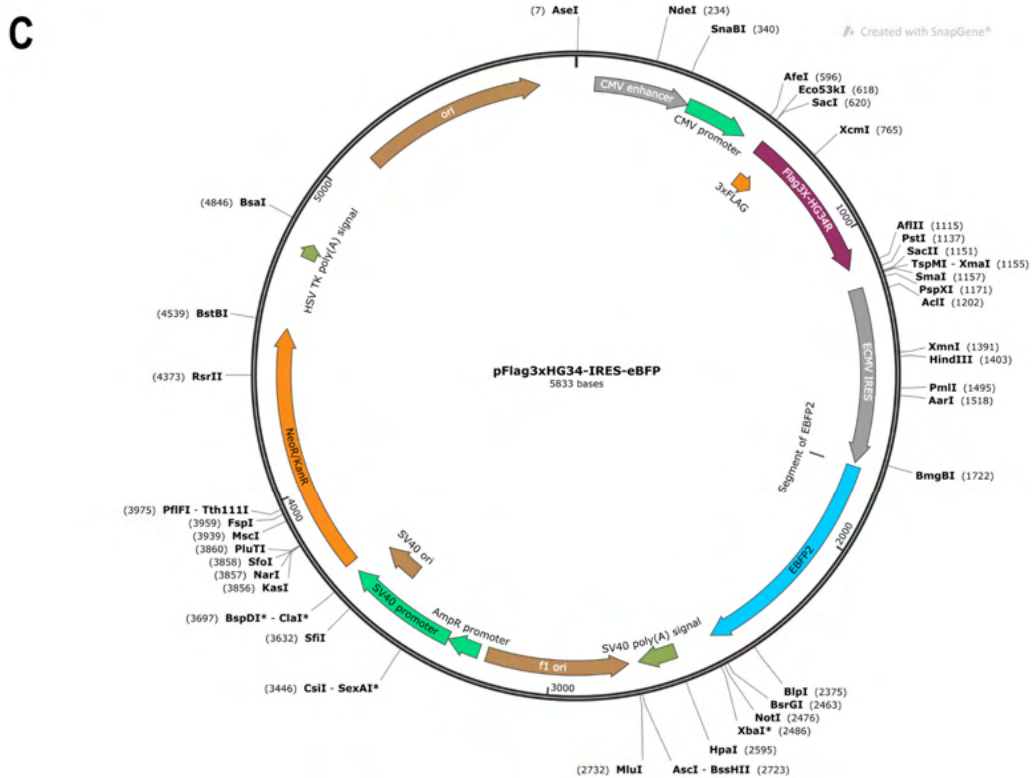

664 **Figure S4**

665 **A)** Illustration depicting the strategy followed to develop the model of human H3.3-G34R  
666 and H3.3-Wt pHGG based on the stable transfection of SJ-GBM2 cells with plasmids  
667 encoding FLAG-H3.3-G34R and FLAG-H3.3-Wt. **B-C)** Maps of the plasmids encoding  
668 FLAG-H3.3-G34R and FLAG-H3.3-Wt developed and utilized to generate the genetically  
669 engineered cells.

670

671

672

673

674

675

676

677

678

679

680

681

682

683

684

685

686

687

688

689

690



# Supplementary Figure 5

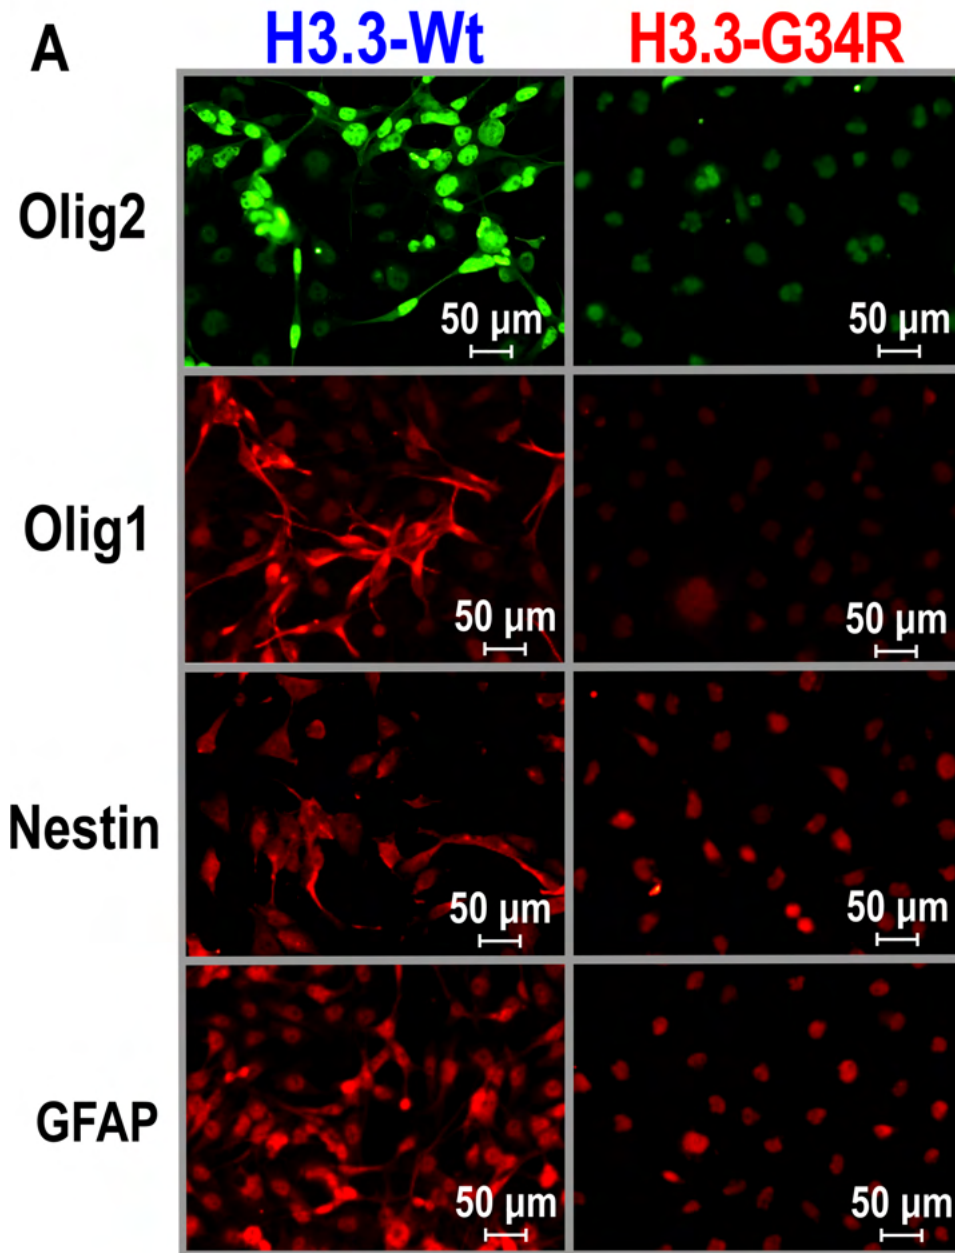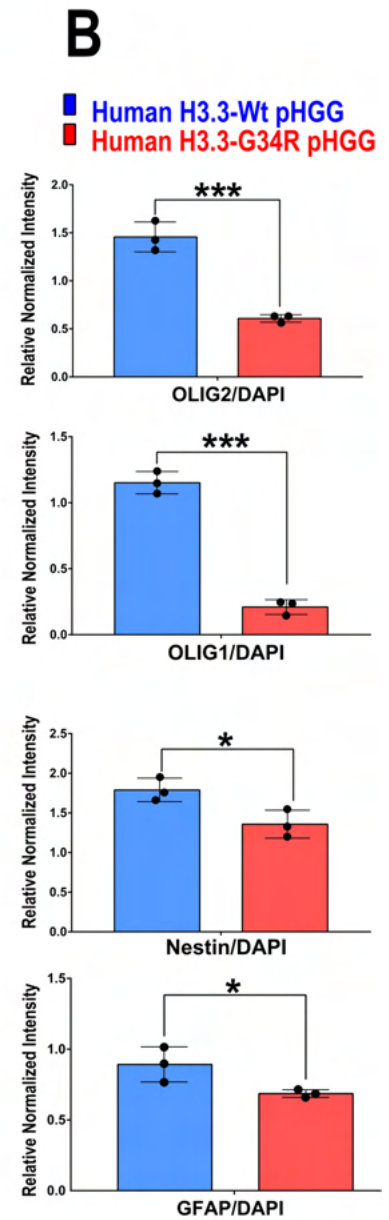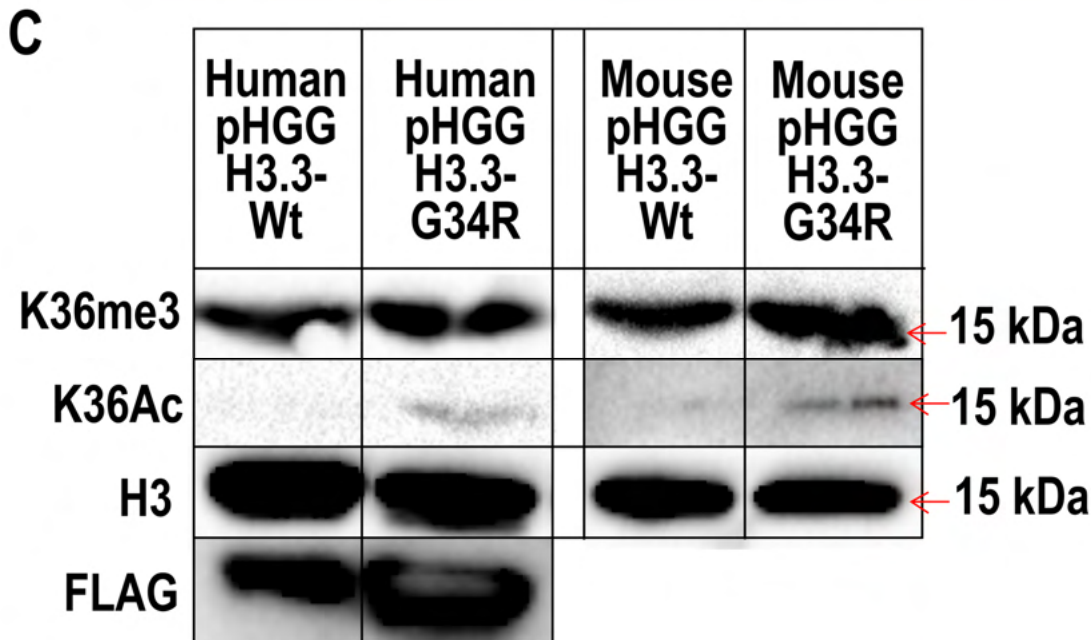

720 **Figure S5**

721 **Characterization of the model of human H3.3-G34R and H3.3-Wt pHGG derived from**

722 **SJ-GBM2 cells. A)** Immunofluorescence staining for the neural markers OLIG2, OLIG1,

723 NESTIN and GFAP, and **B)** quantification of the levels of expression based on image

724 analysis. **C)** Western blotting for FLAG, peptide expressed as a fusion protein of H3.3-

725 G34R and H3.3-Wt in human pHGG cells, and histone marks K36me3 and K36Ac, with

726 total histone 3 as a histone loading control, in human and mouse pHGG cells. (*\*p*<0.05,

727 *\*\*p*<0.01, *\*\*\*p*<0.005, *\*\*\*\*p*<0.001; unpaired *t* test. Data represent mean ± SD of five

728 different field of views)

729

730

731

732

733

734

735

736

737

738

739

740

741

742

743

744

# Supplementary Figure 6

## Mouse pHGG: Full network of Differentially expressed Gene Ontologies (from RNA-seq)

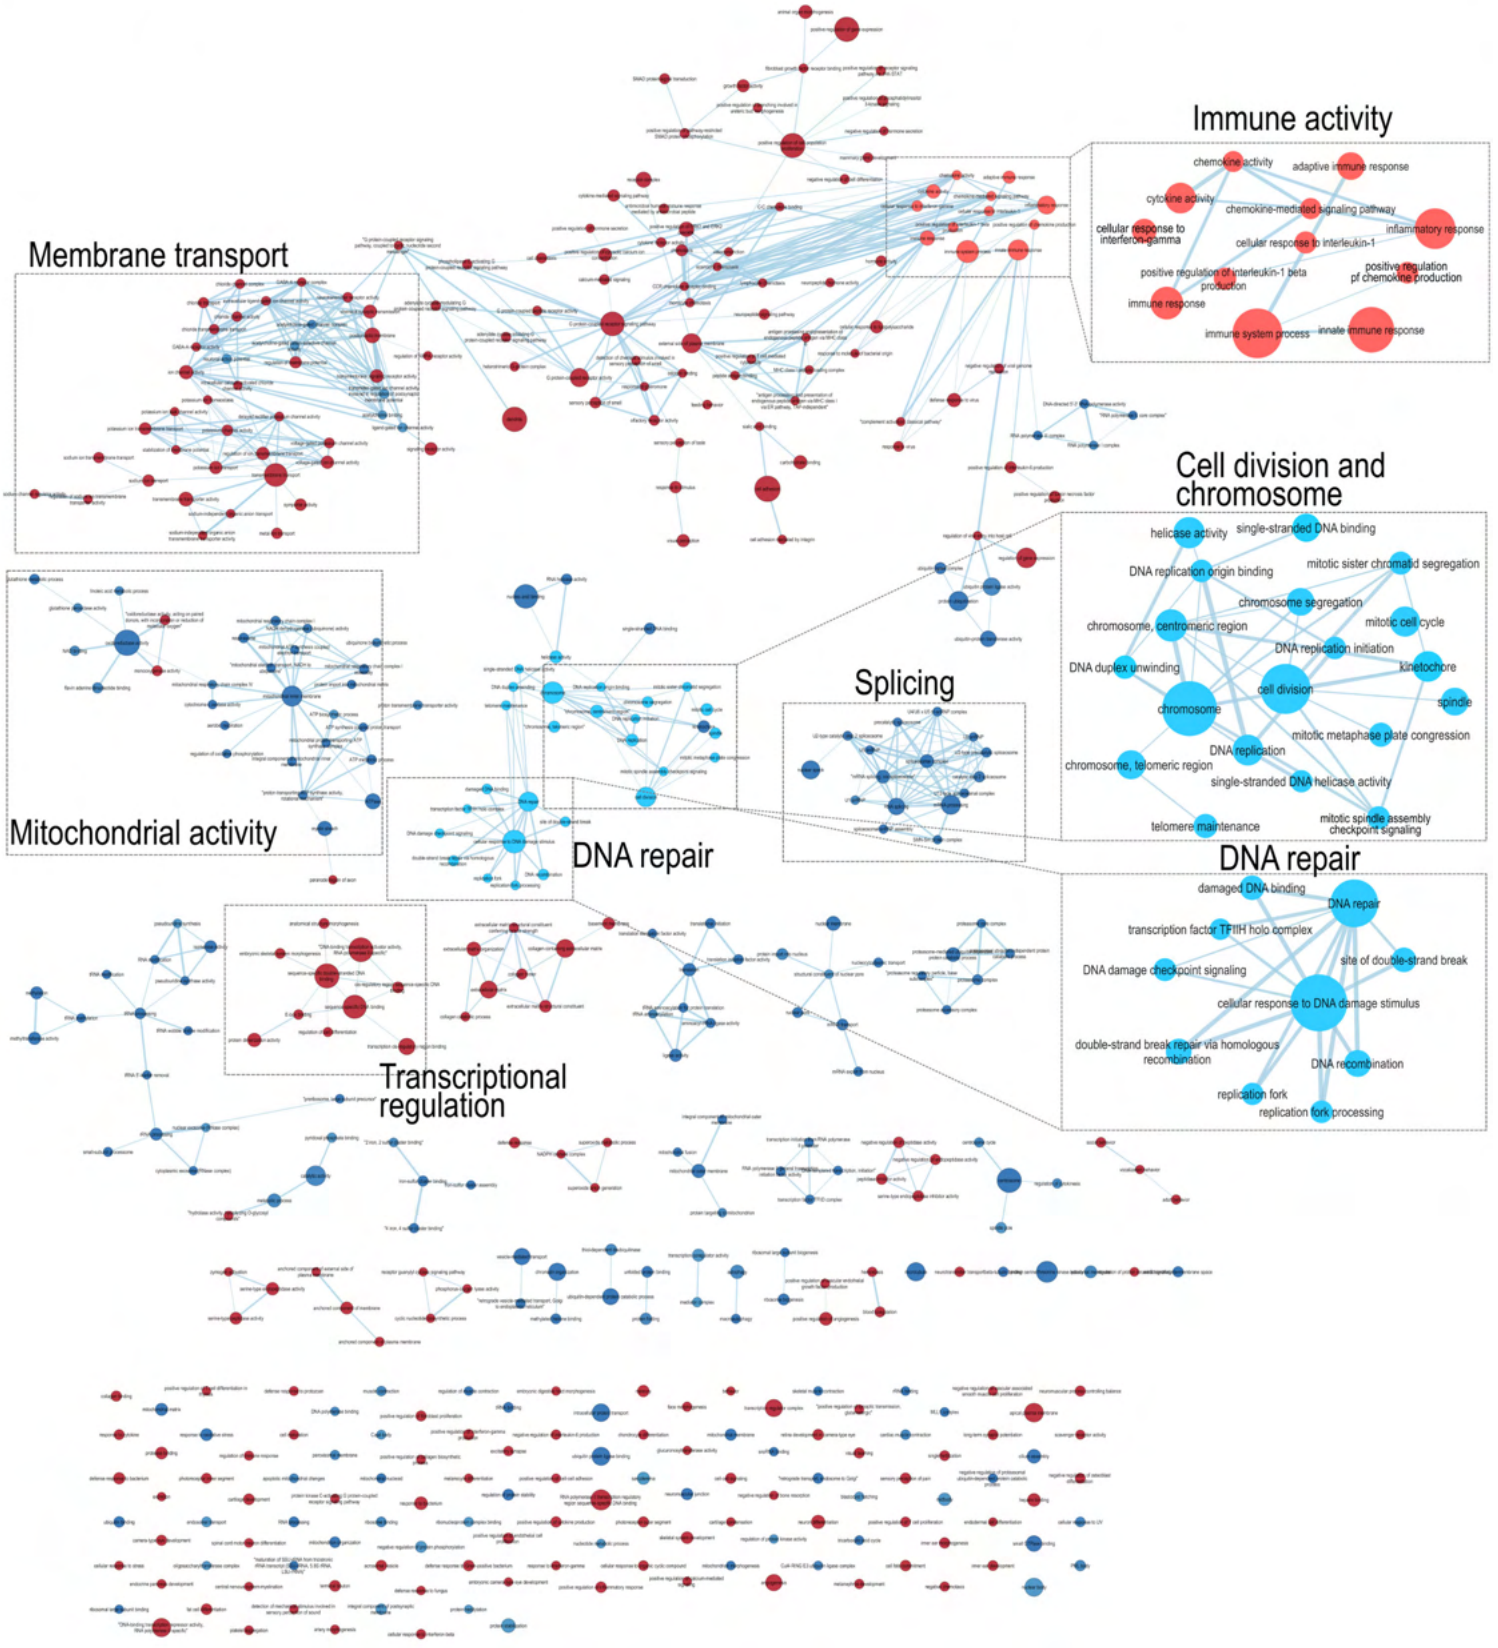

774 **Figure S6**

775 Complete results of the Gene Set Ontology Analysis based on the RNA-seq from H3.3-  
776 G34R versus H3.3-Wt mouse pHGG cells. The relevant families of gene ontologies are  
777 highlighted. The diameter of the node indicates the number of genes of the Gene  
778 ontology. Ontologies in blue are downregulated in H3.3-G34R, and ontologies in red are  
779 upregulated in H3.3-G34R pHGG mouse cells.

780

781

782

783

784

785

786

787

788

789

790

791

792

793

794

795

796

797

798

799

800



# Supplementary Figure 7

## Expression levels of DNA repair genes: mouse pHGG

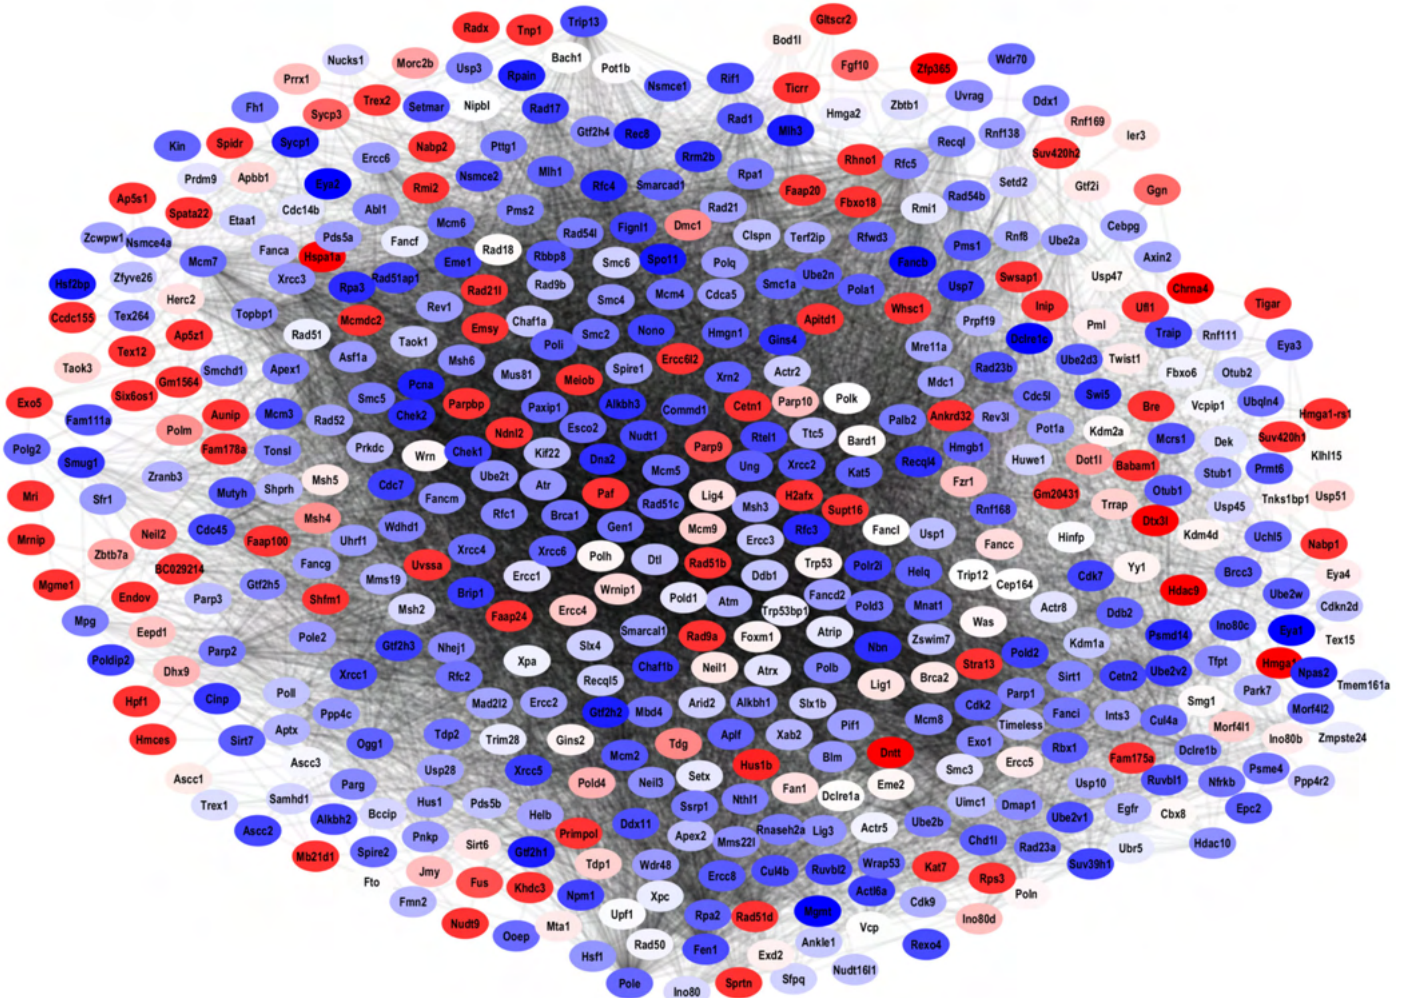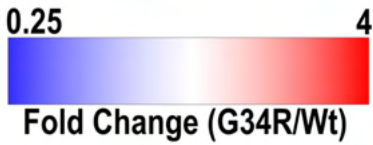

830 **Figure S7**

831 Full network of genes belonging to the Gene Ontology “DNA repair”, and their relative  
832 expression (G34R/Wt) expressed with the color code (Blue: downregulated in G34R, Red:  
833 upregulated in G34R)

834

835

836

837

838

839

840

841

842

843

844

845

846

847

848

849

850

851

852

853

854

855

856

## Supplementary Figure 8

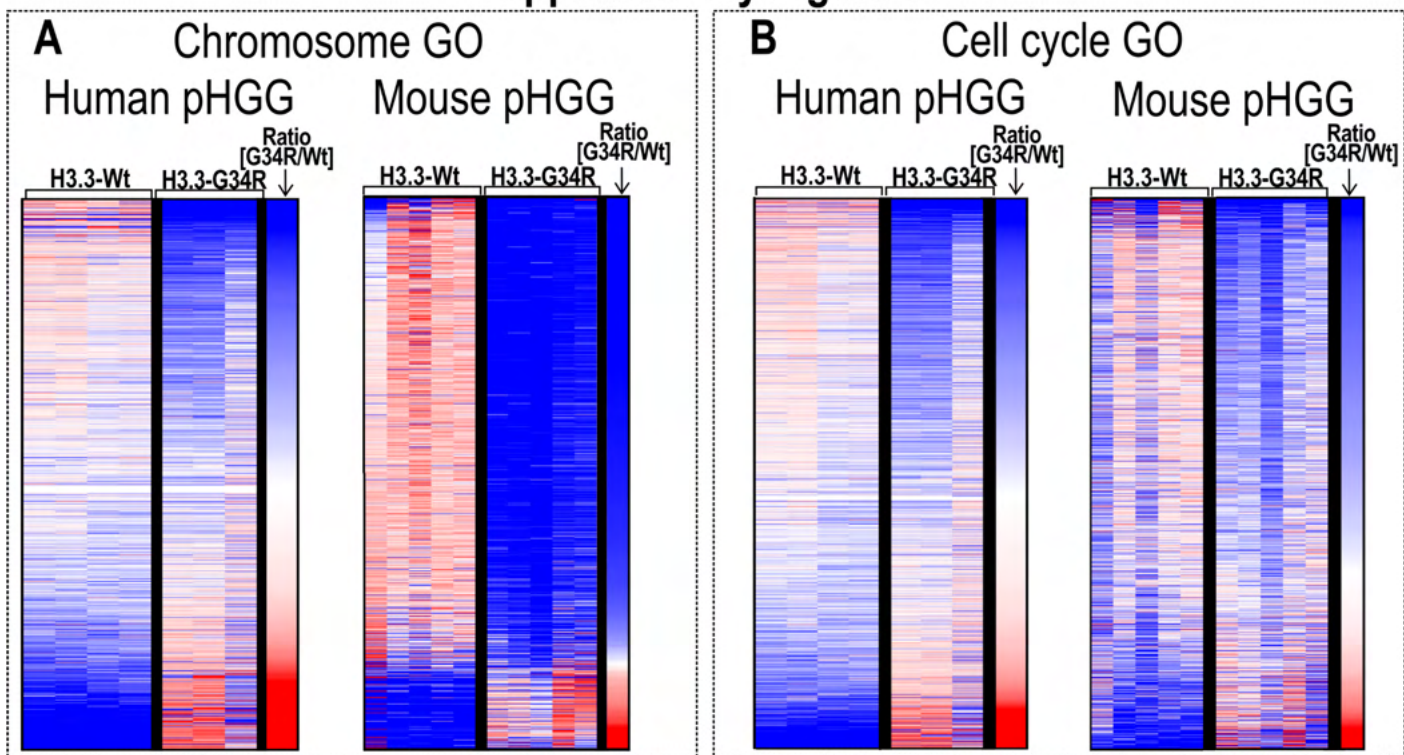

### C Combined analysis of DNA repair GO top downregulated genes

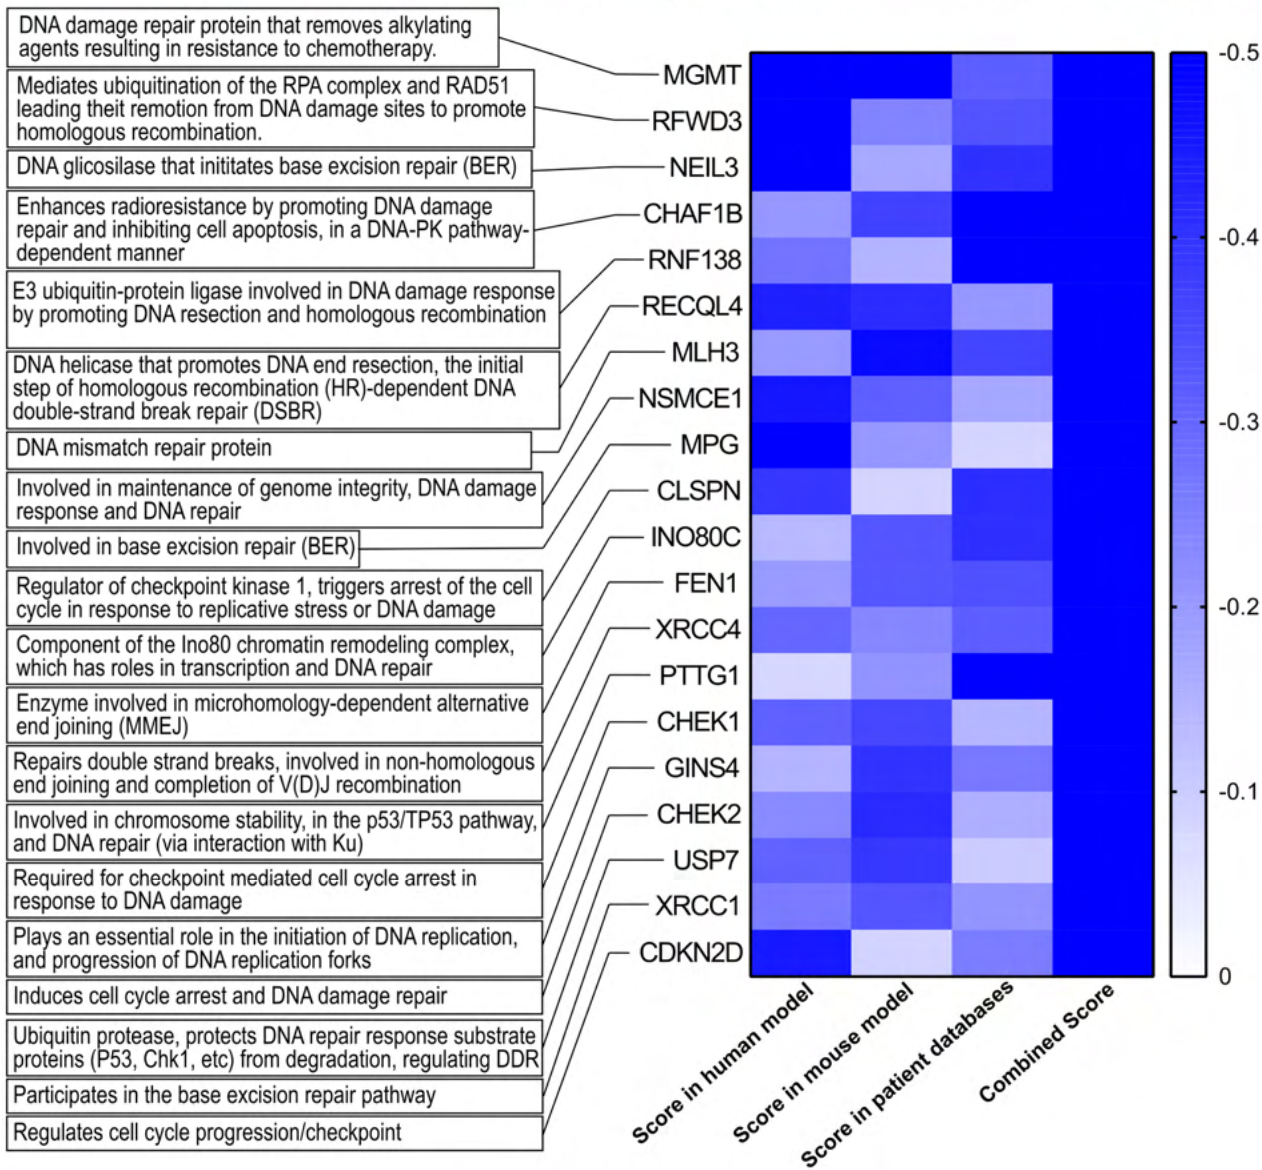



886 **Figure S8**

887 **A)** Heatmap of genes belonging to the Gene Ontology “Chromosome” in H3.3-G34R  
888 versus H3.3-Wt human and mouse pHGG models. **B)** Heatmap of genes belonging to the  
889 Gene Ontology “Cell Cycle” in H3.3-G34R versus H3.3-Wt human and mouse pHGG  
890 models. **C)** Heatmap depicting a combined analysis highlighting the DNA repair GO  
891 genes that are most downregulated in G34R pHGG in the mouse model, the human  
892 model and the pHGG patients.

893

894

895

896

897

898

899

900

901

902

903

904

905

906

907

908

909

910

911



# Supplementary Figure 9

## Human pHGG: Full network of Differentially expressed Gene Ontologies (from RNA-seq)

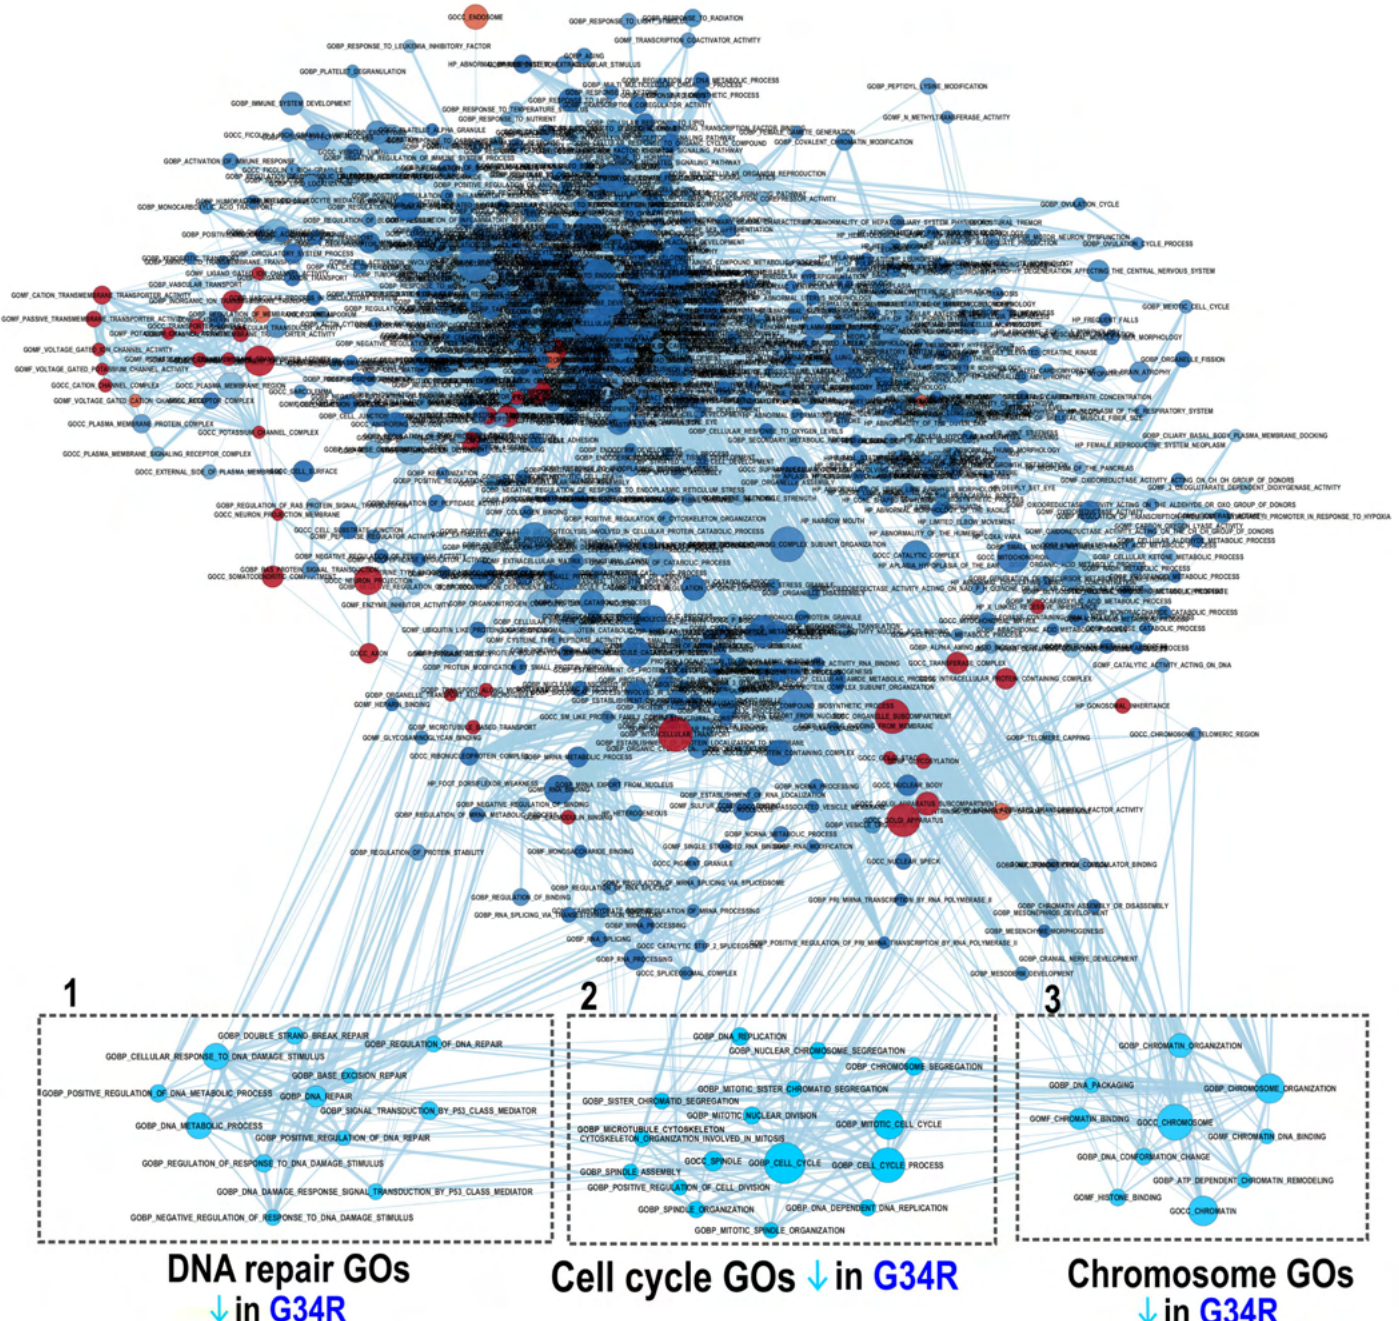

941 **Figure S9**

942 Full Gene Set Ontology Analysis (GSEA) based on RNA-seq of human H3.3-G34R vs.  
943 H3.3-Wt pHGG, depicting differentially expressed Gene Ontologies (GOs). The diameter  
944 of the node indicates the number of genes of the Gene ontology. Downregulated GOs in  
945 H3.3-G34R vs H3.3-Wt are depicted in blue, and upregulated GOs in H3.3-G34R vs H3.3-  
946 Wt are depicted in red. The most prominent GO groups are indicated (1= DNA repair-  
947 related GOs; 2= Cell cycle-related GOs; 3= Chromosome-related GOs).

948

949

950

951

952

953

954

955

956

957

958

959

960

961

962

963

964

965

966



# Supplementary Figure 10

## DNA repair Gene ontology analysis in human pHGg: gene expression network

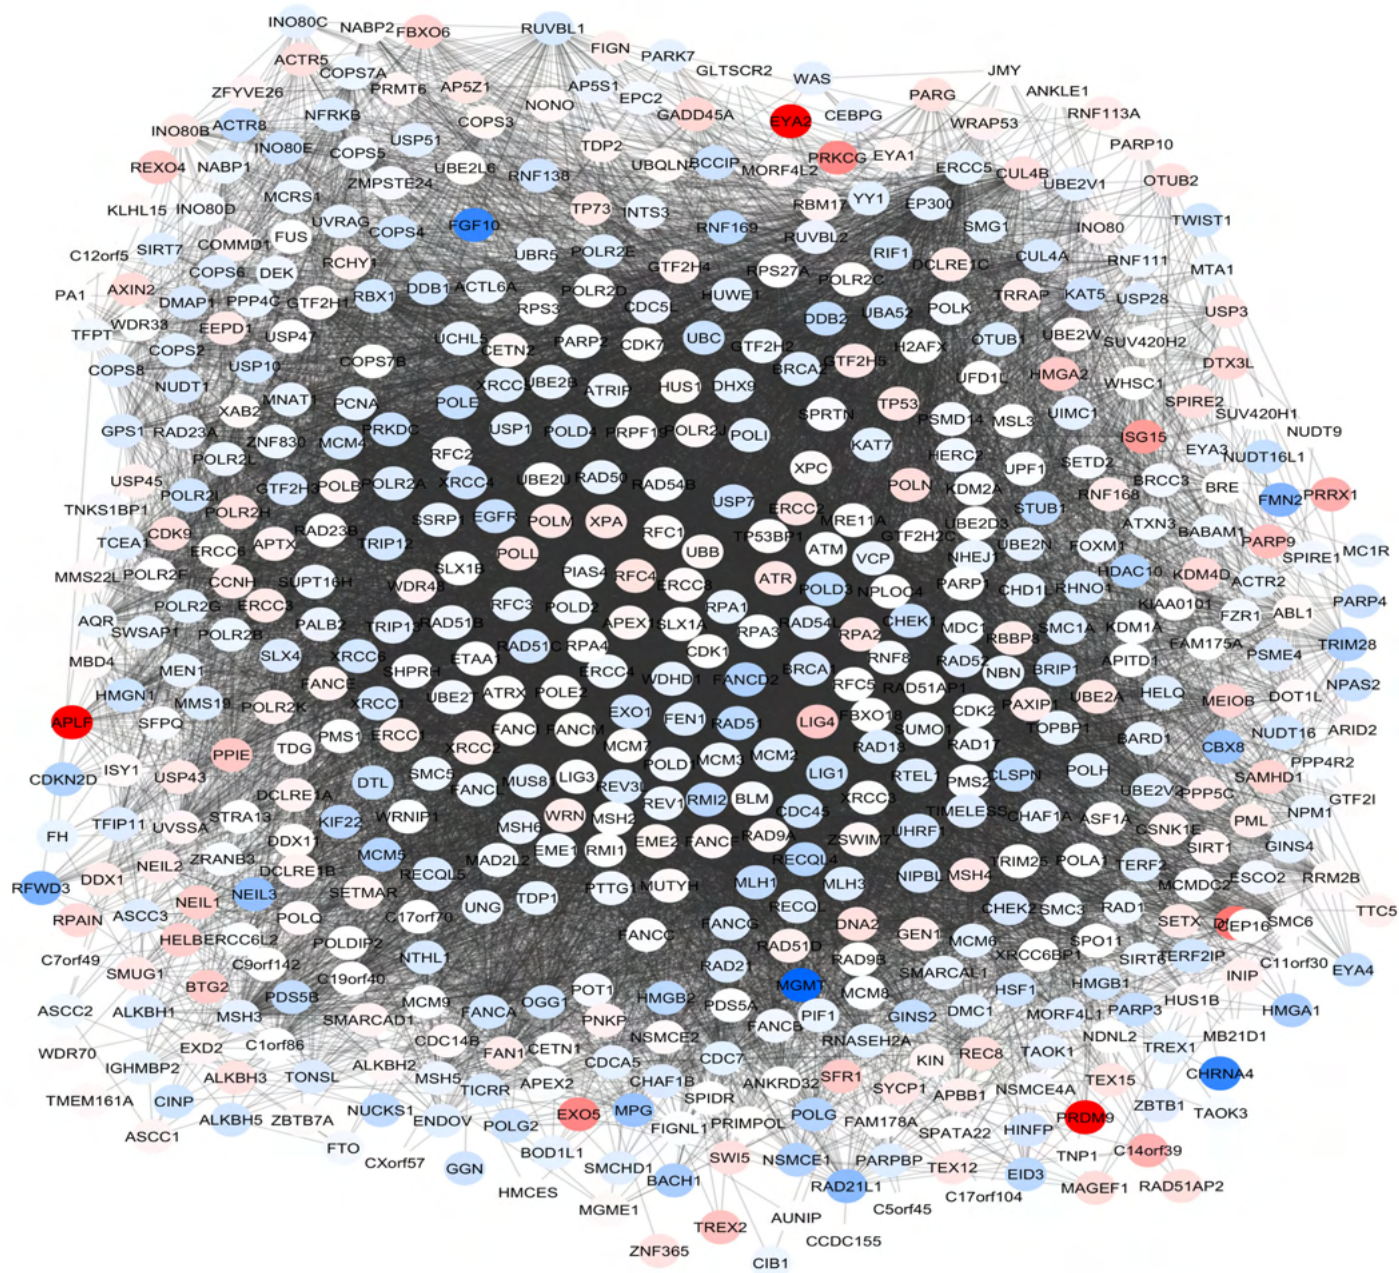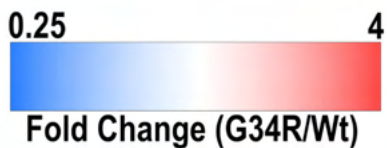

996 **Figure S10**

997 Full network of genes belonging to the Gene Ontology “DNA repair”, and their relative  
998 expression in the human pHGG model (G34R/Wt) is expressed with the color code (Blue:  
999 genes downregulated in G34R, Red: genes upregulated in G34R)

1000

1001

1002

1003

1004

1005

1006

1007

1008

1009

1010

1011

1012

1013

1014

1015

1016

1017

1018

1019

1020

1021

1022



# Supplementary Figure 11

## Transcriptional activity of DNA repair genes from patients databases

**A**

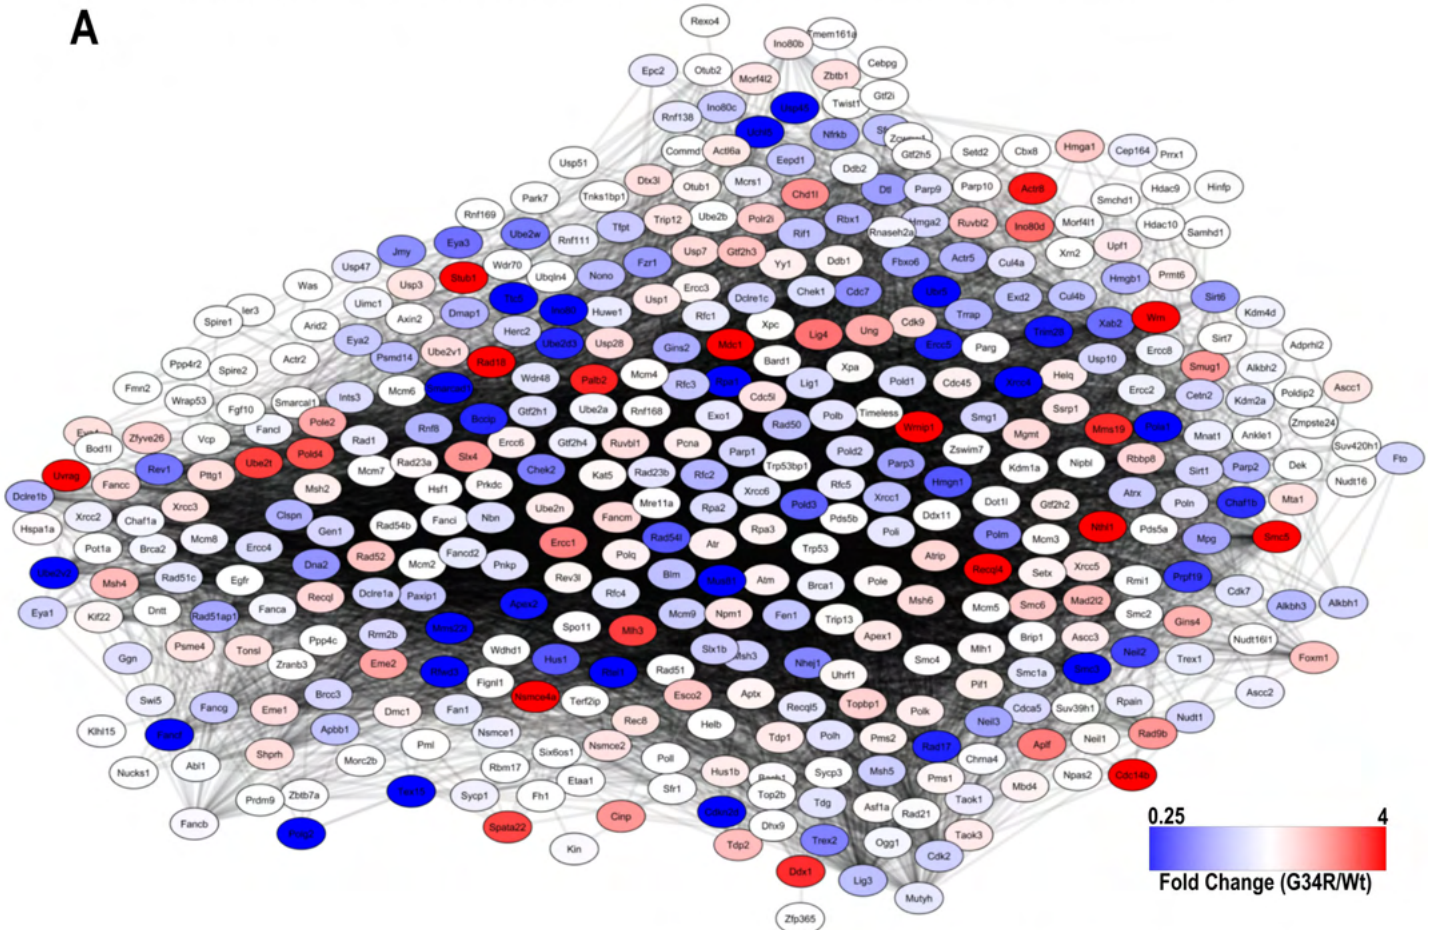

**B**

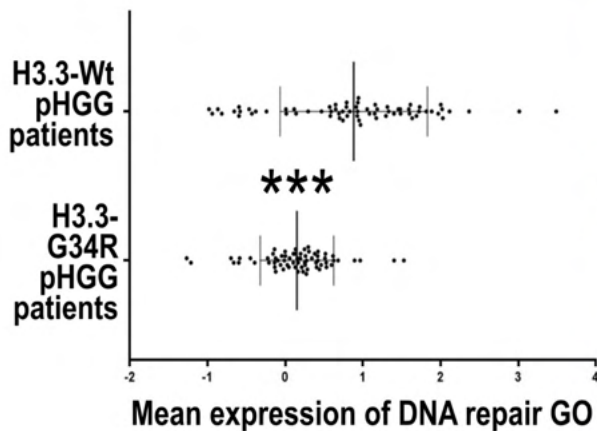

**C**

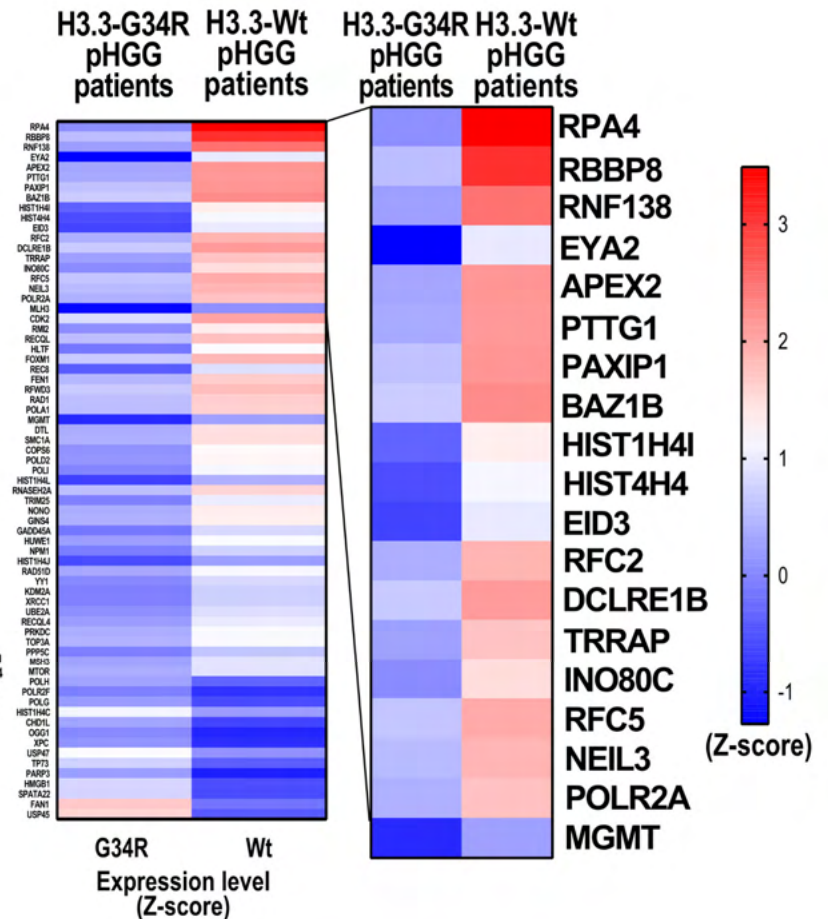

1052 **Figure S11**

1053 **Analysis of the expression of genes belonging to the Gene Ontology “DNA repair”**  
1054 **from patient databases. H3.3-G34R pHGGS were compared with H3.3-Wt ATRX-**  
1055 **mutant and P53-mutant patients. A)** Full network of genes belonging to the Gene  
1056 Ontology “DNA repair”, where the relative expression in H3.3-G34R versus H3.3-Wt  
1057 patients (G34R/Wt) is expressed with the color code (Blue: genes downregulated in G34R  
1058 patients, Red: genes upregulated in G34R patients) **B)** Mean expression of genes  
1059 belonging to the Gene Ontology “DNA repair” in H3.3-G34R and H3.3-Wt patients. **C)**  
1060 Heatmap of genes belonging to the Gene Ontology “DNA repair” in H3.3-G34R versus  
1061 H3.3-Wt patients (G34R/Wt) the most differential genes in G34R vs Wt patients are  
1062 highlighted. (Blue: low relative expression; red: high relative expression) (\*\*\*) $p < 0.005$ ,  
1063 unpaired t test (B)).

1064

1065

1066

1067

1068

1069

1070

1071

1072

1073

1074

1075

1076

# Supplementary Figure 12

Gating strategy for flow cytometry proliferation experiments shown in Figure 3

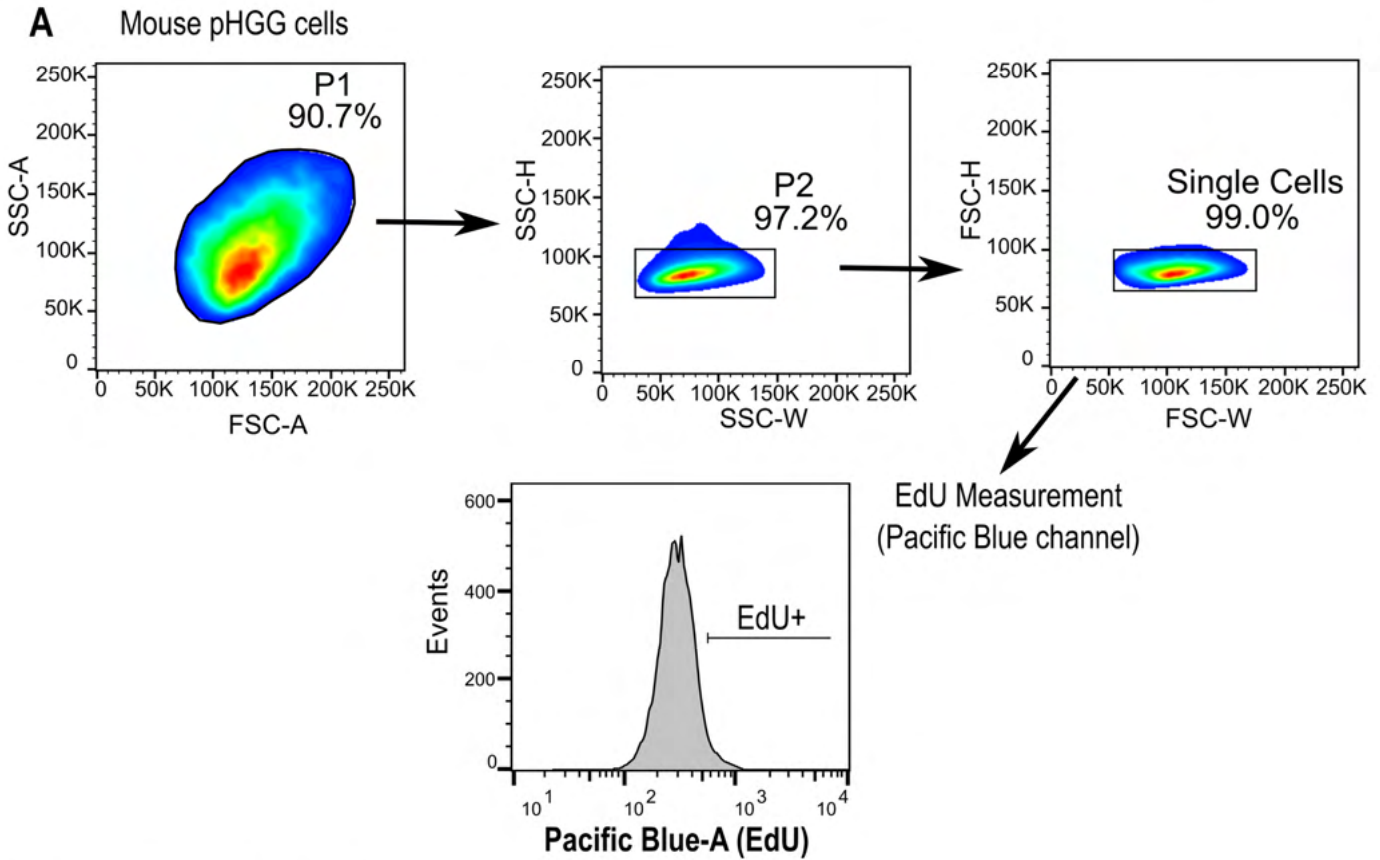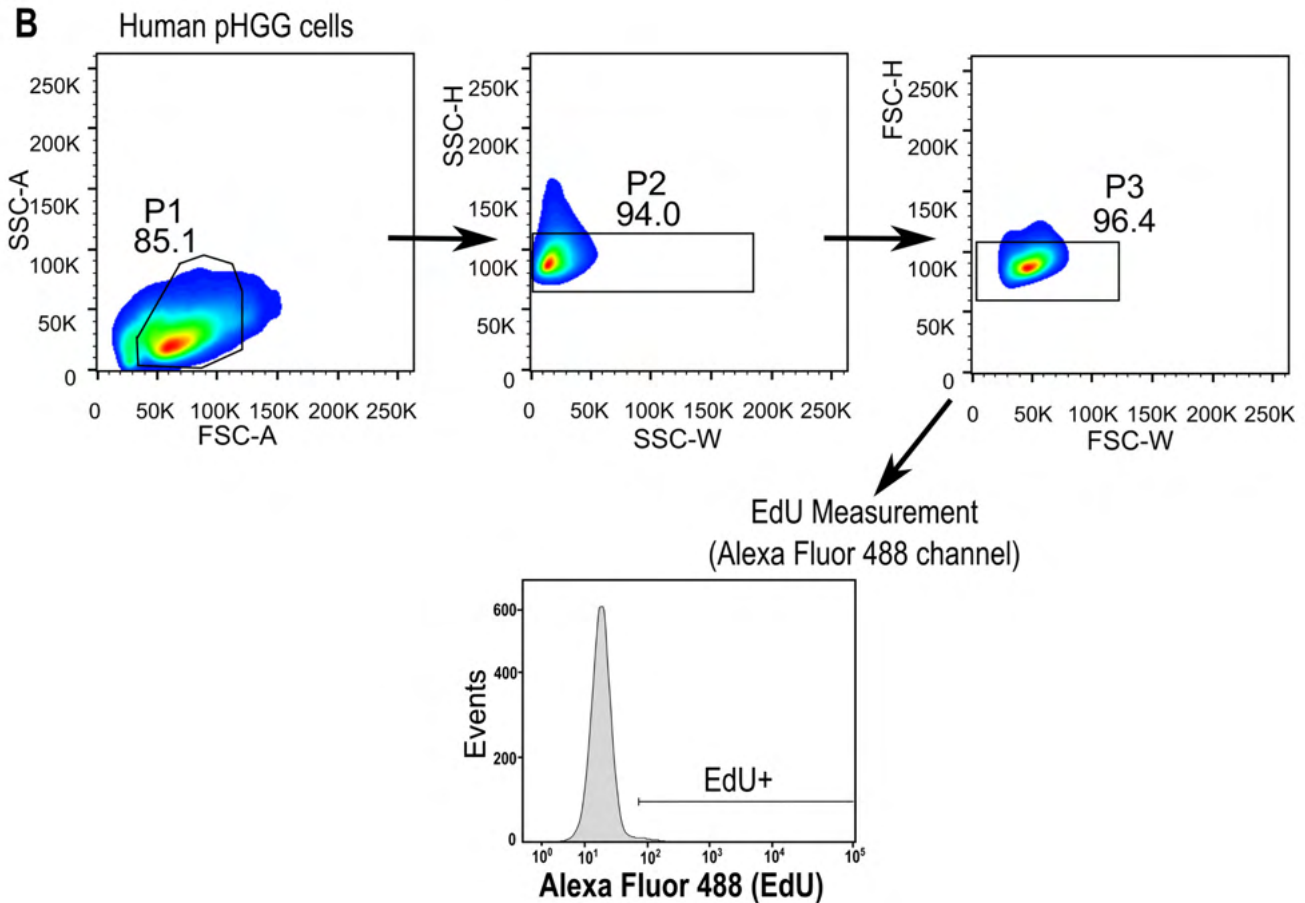

1096 **Figure S12**

1097 Representative sample depicting the gating strategy utilized for flow cytometry  
1098 experiments from Figure 3, to assess EdU incorporation levels in mouse **(A)** and human  
1099 **(B)** cells. EdU positive gating was set to represent <1% of the cells on the isotype negative  
1100 control samples.

1101

1102

1103

1104

1105

1106

1107

1108

1109

1110

1111

1112

1113

1114

1115

1116

1117

1118

1119

1120

1121

1122



# Supplementary Figure 13

Frequency of colony initiating cells *in vitro*, mouse and human pHGG cells

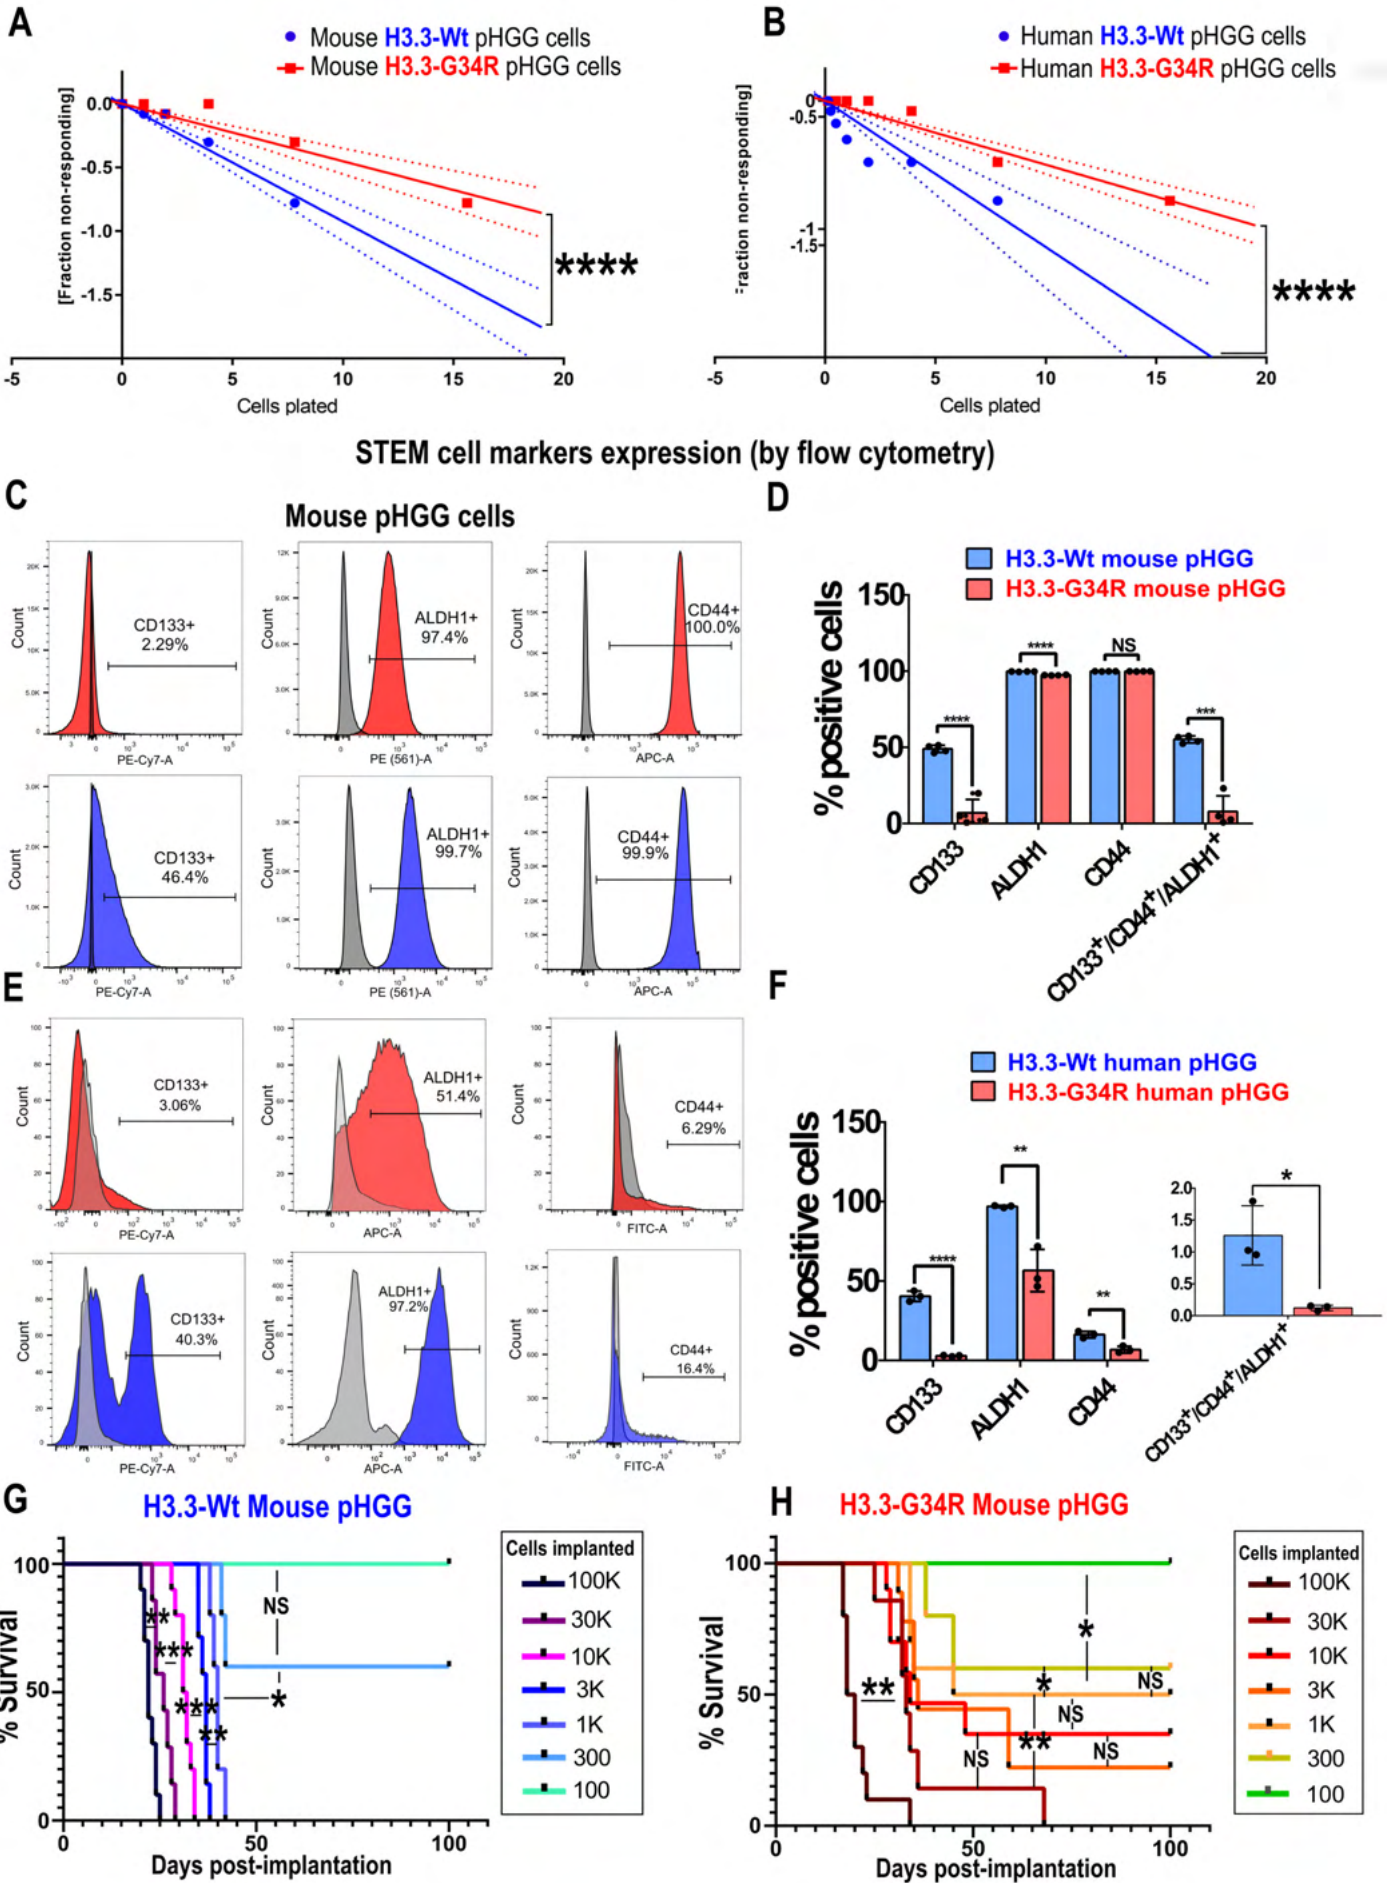

1150 **Figure S13: Analysis of stem cell properties of H3.3-G34R cells in vitro and in vivo.**  
1151 **A)** Frequency of colony initiating cells in mouse H3.3-G34R and H3.3-Wt pHGG cells.  
1152 (Non-responding = Fraction of wells with no cells). **B)** Frequency of colony initiating cells  
1153 in human H3.3-G34R and H3.3-Wt pHGG cells. (Non-responding = Fraction of wells with  
1154 no cells). **(C-D)** Representative flow cytometry plots and quantification of the percentage  
1155 of the CD133+, ALDH1+, CD44+, and triple positive cells in H3.3-wt (blue) and H3.3G34R  
1156 (red) in mouse pHGG cells. **(E-F)** Representative flow cytometry plots and quantification  
1157 of the percentage of the CD133+, ALDH1+, CD44+, and triple positive cells in H3.3-wt  
1158 (blue) and H3.3G34R (red) in human pHGG cells. **G)** Tumor initiating capacity *in vivo* of  
1159 H3.3-Wt mouse cells. (DPI = Days post-implantation) **H)** Tumor initiating capacity *in vivo*  
1160 of H3.3-G34R mouse cells. (DPI = Days post-implantation) (\* $p < 0.05$ , \*\* $p < 0.01$ ,  
1161 \*\*\* $p < 0.005$ , \*\*\*\* $p < 0.001$ ; analysis of slope difference from linear regression model (A, B);  
1162 unpaired *t* test (D, F); analysis of median survival from Kaplan–Meier model (G-H). Data  
1163 represent mean  $\pm$  SD of three experimental replicates (A, B, D, F)).

1164

1165

1166

1167

1168

1169

1170

1171

1172

1173

1174

# Supplementary Figure 14

Determination of triple positive (CD133/ALDH1/CD44) cells by flow cytometry

**A** Mouse H3.3G34R CD44+ cells

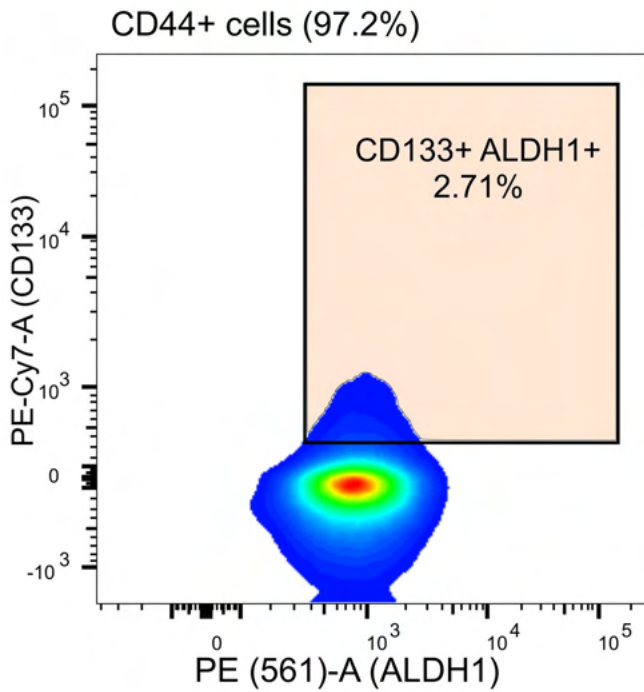

**B** Mouse H3.3Wt CD44+ cells

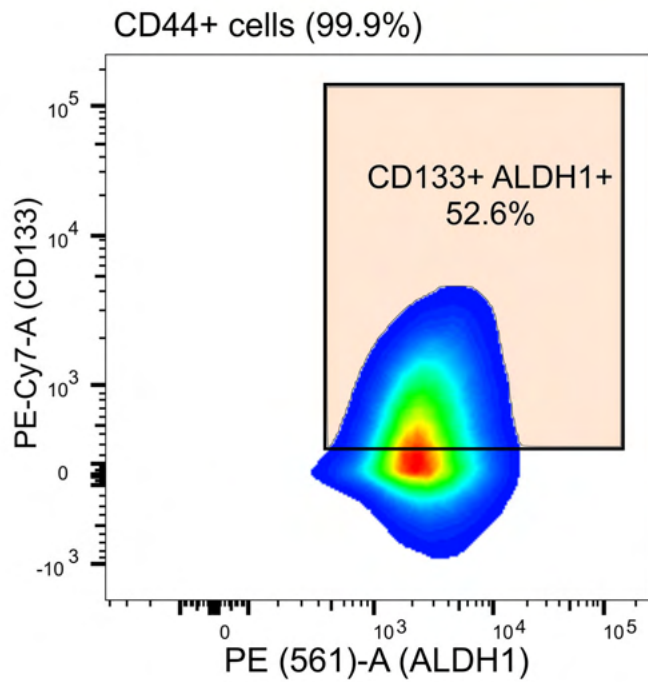

**C** Human H3.3G34R CD44+ cells

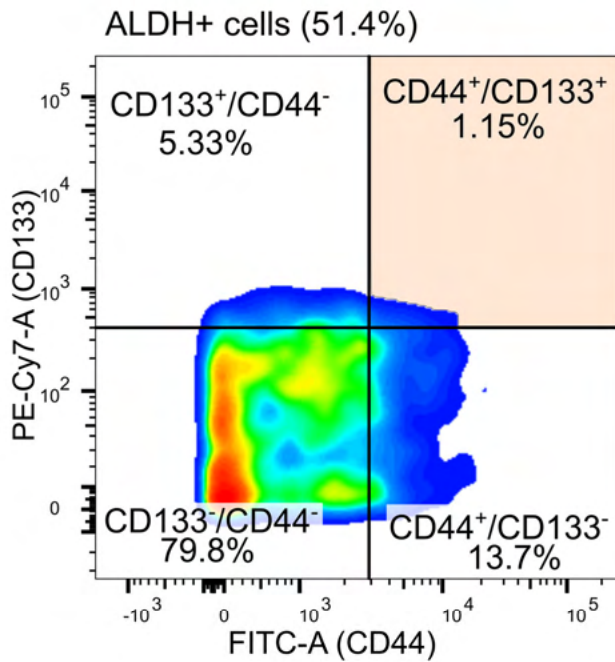

**D** Human H3.3Wt CD44+ cells

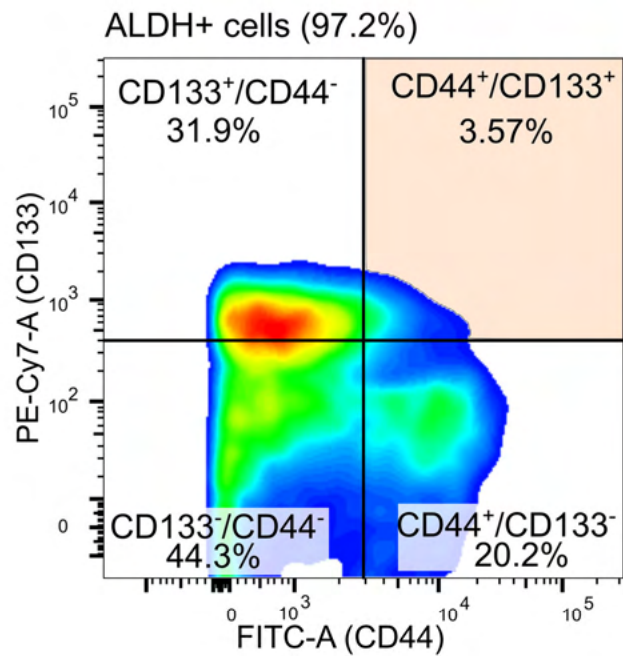

1204 **Figure S14**

1205 **A-B)** Representative sample depicting the percentages of triple positive cells (CD44+,  
1206 CD133+, ALDH+) within the CD44+ cells in mouse H3.3-G34R and H3.3-Wt pHGG cells  
1207 (from experiment in Fig 4). **C-D)** Representative sample depicting the percentages of  
1208 triple positive cells (CD44+, CD133+, ALDH+) within the ALDH1+ cells in human H3.3-  
1209 G34R and H3.3-Wt pHGG cells (from experiment in Figure s13).

1210

1211

1212

1213

1214

1215

1216

1217

1218

1219

1220

1221

1222

1223

1224

1225

1226

1227

1228

1229

1230

# Supplementary Figure 15

**A** Gating strategy for experiment shown in Supplementary Figure 13.C-D (mouse pHGG cells)

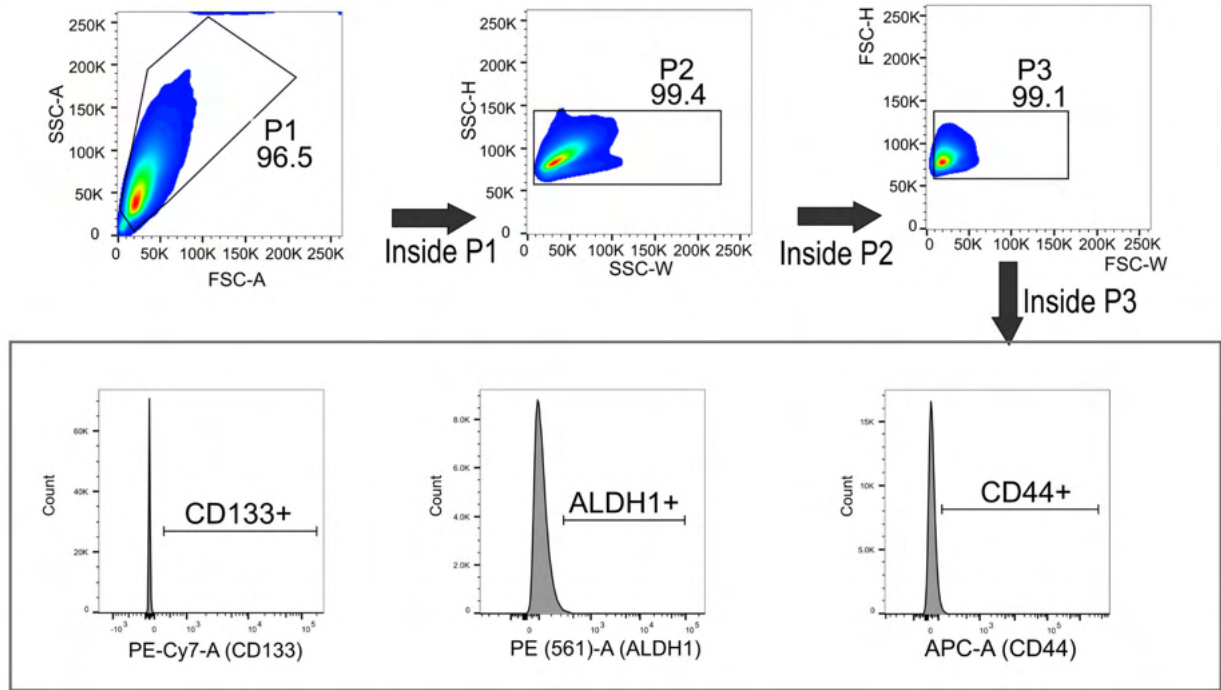

**B** Gating strategy for experiment shown in Supplementary Figure 13.E-F (human pHGG cells)

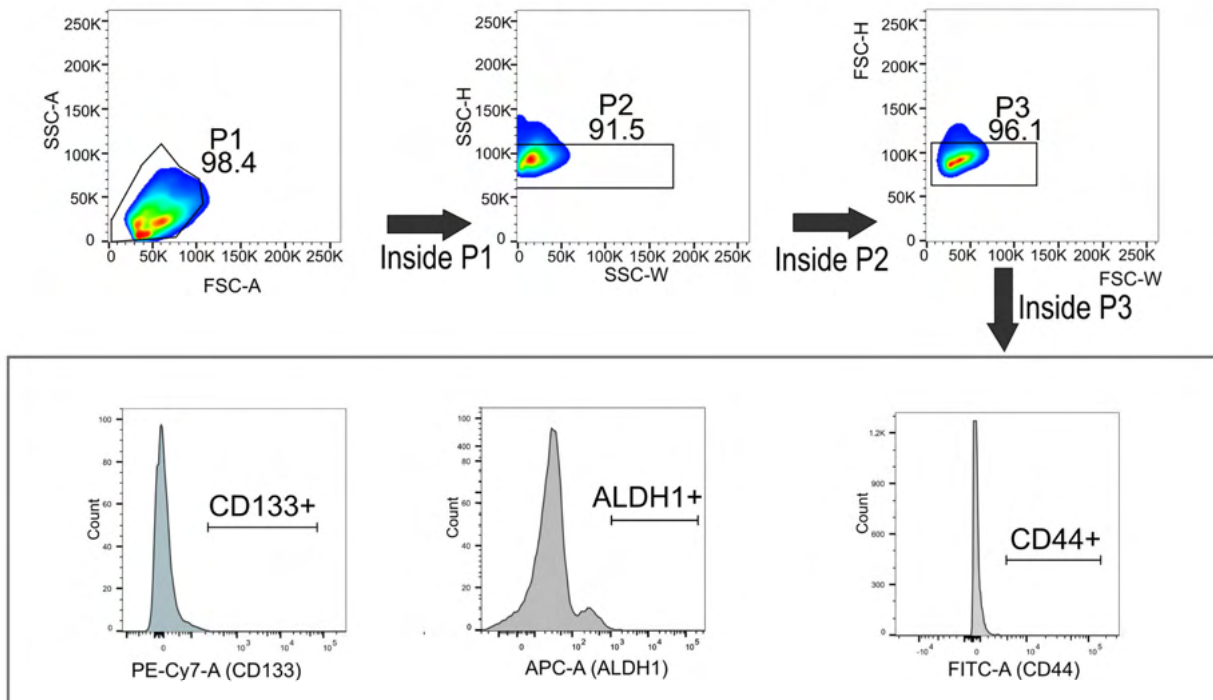

1260 **Figure S15**

1261 **A)** Representative sample depicting the gating strategy and fluorescence channels  
1262 utilized for cytometry experiments in figure 4(C-D) **B)** Representative sample depicting  
1263 the gating strategy and fluorescence channels utilized for cytometry experiments in figure  
1264 4(E-F). CD133, ALDH1 and CD44 positive gratings were set to represent <1% of the cells  
1265 on the respective isotype negative control samples.

1266

1267

1268

1269

1270

1271

1272

1273

1274

1275

1276

1277

1278

1279



## Supplementary Figure 16

### DNA repair activity reporter assay: fluorescence microscopy

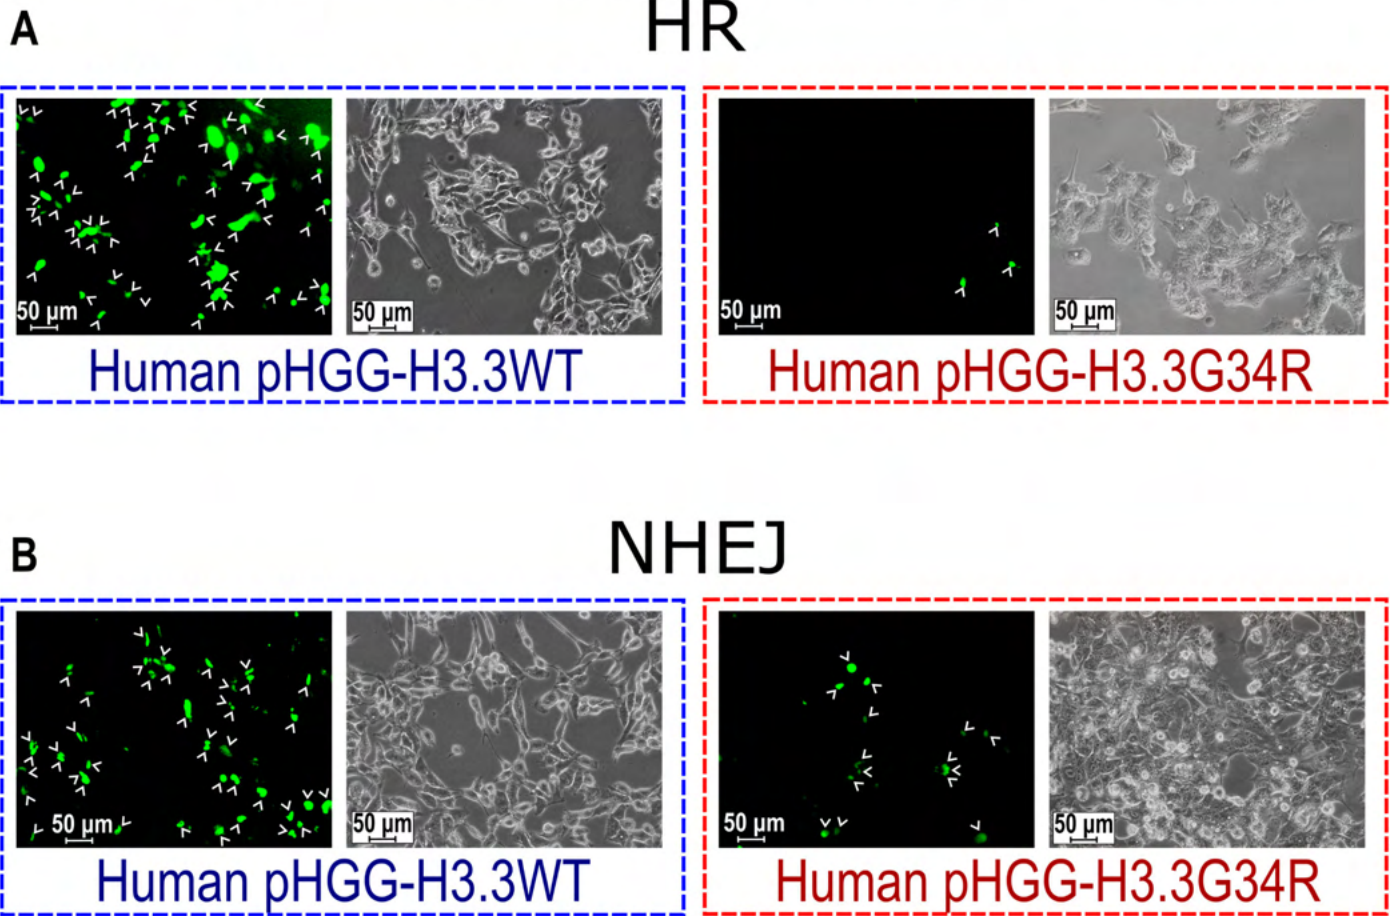

1299 **Figure S16**

1300 Fluorescence microscopy images of human pHGG cells transfected with HR (A) and  
1301 NHEJ (B) reporter plasmids illustrating the DNA repair activities via HR and NHEJ in H3.3-  
1302 G34R and H3.3-Wt cells. Arrowheads indicate GFP positive cells.

1303

1304

1305

1306

1307

1308

1309

1310

1311

1312

1313

1314

1315

1316

1317

1318

1319

1320

1321

1322

1323



# Supplementary Figure 17

Chromatin accessibility and DNA repair activity in human endogenous **H3.3-G34R/H3.3-Wt** pHGG cells

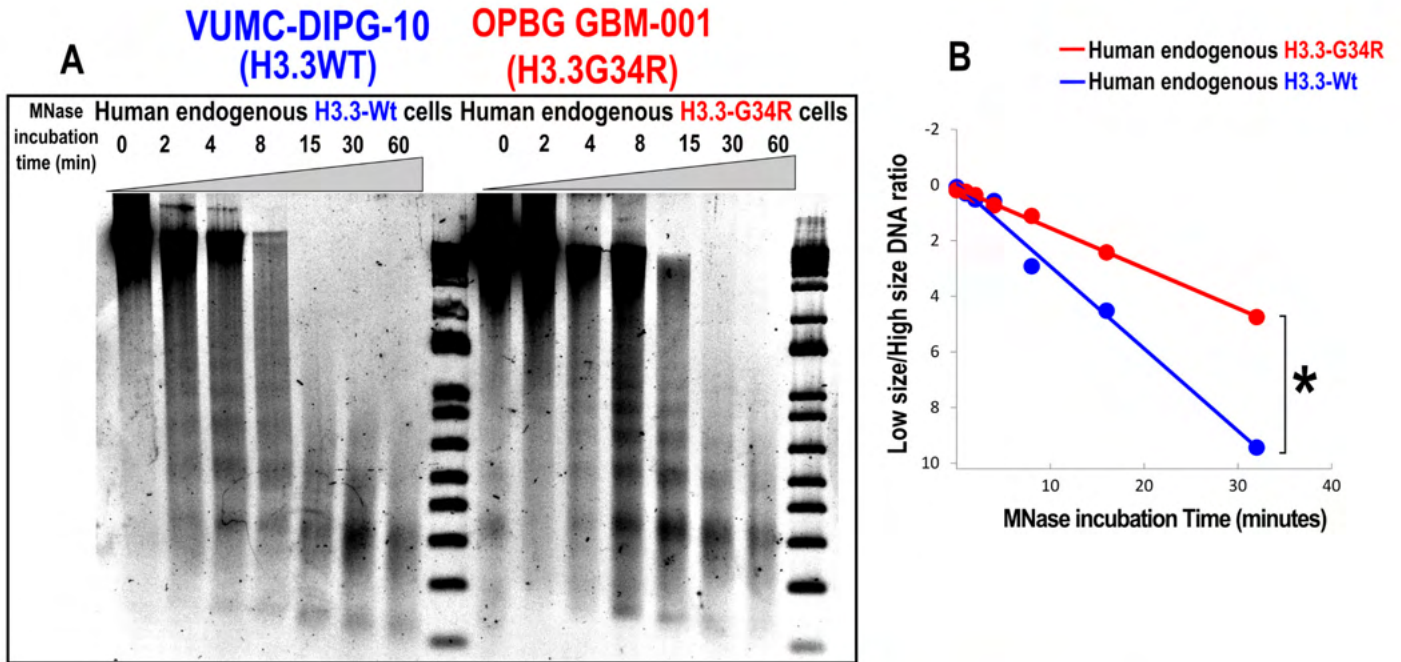

DNA repair activity: Human endogenous **H3.3-G34R/H3.3-Wt** pHGG

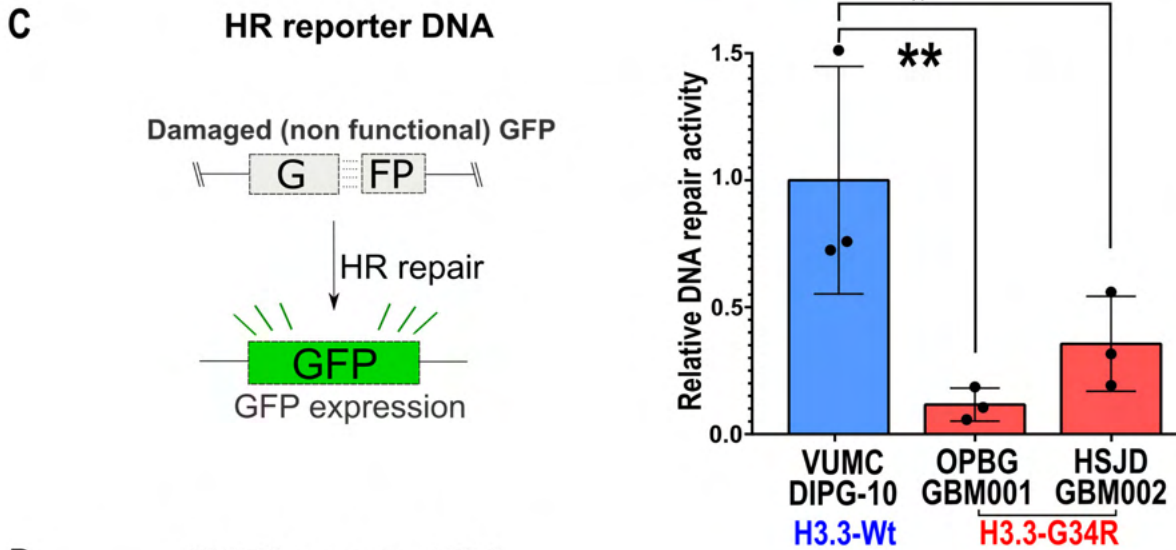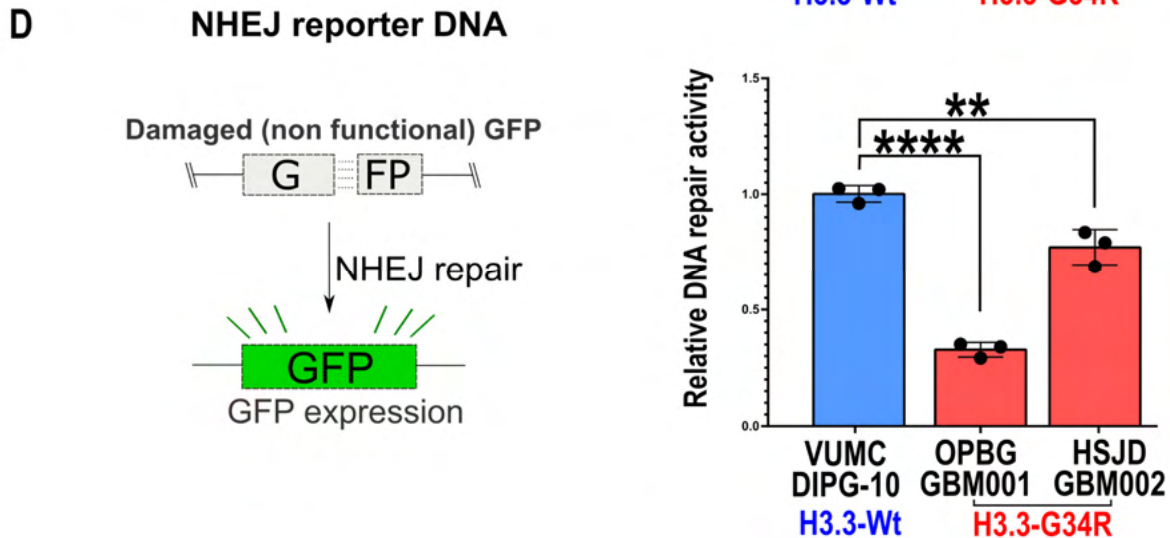

1344 **Figure S17**

1345 **A)** DNA electrophoresis gel depicting the results of a Micrococcal nuclease (MNase)  
1346 chromatin accessibility assay performed in endogenous histone mutant (H3.3-G34R) and  
1347 histone wild type (H3.3-Wt) patient derived cells, and **B)** statistical analysis of this  
1348 experiment. **C-D)** Results of a DNA repair activity assay performed in endogenous histone  
1349 mutant (H3.3-G34R) and histone wild type (H3.3-Wt) patient derived cells, showing the  
1350 homologous recombination (HR) and non-homologous end joining NHEJ basal DNA  
1351 repair activities of each cell. (*\*p<0.05, \*\*p<0.01, \*\*\*p<0.005, \*\*\*\*p<0.001; analysis of*  
1352 *slope difference in nonlinear regression model (B); unpaired t test (C-D). Data represent*  
1353 *mean ± SD of three experimental replicates (C-D)).*

1354

1355

1356

1357

1358

1359

1360

1361

1362

1363

# Supplementary Figure 18

## Analysis of double strand breaks by neutral comet assay

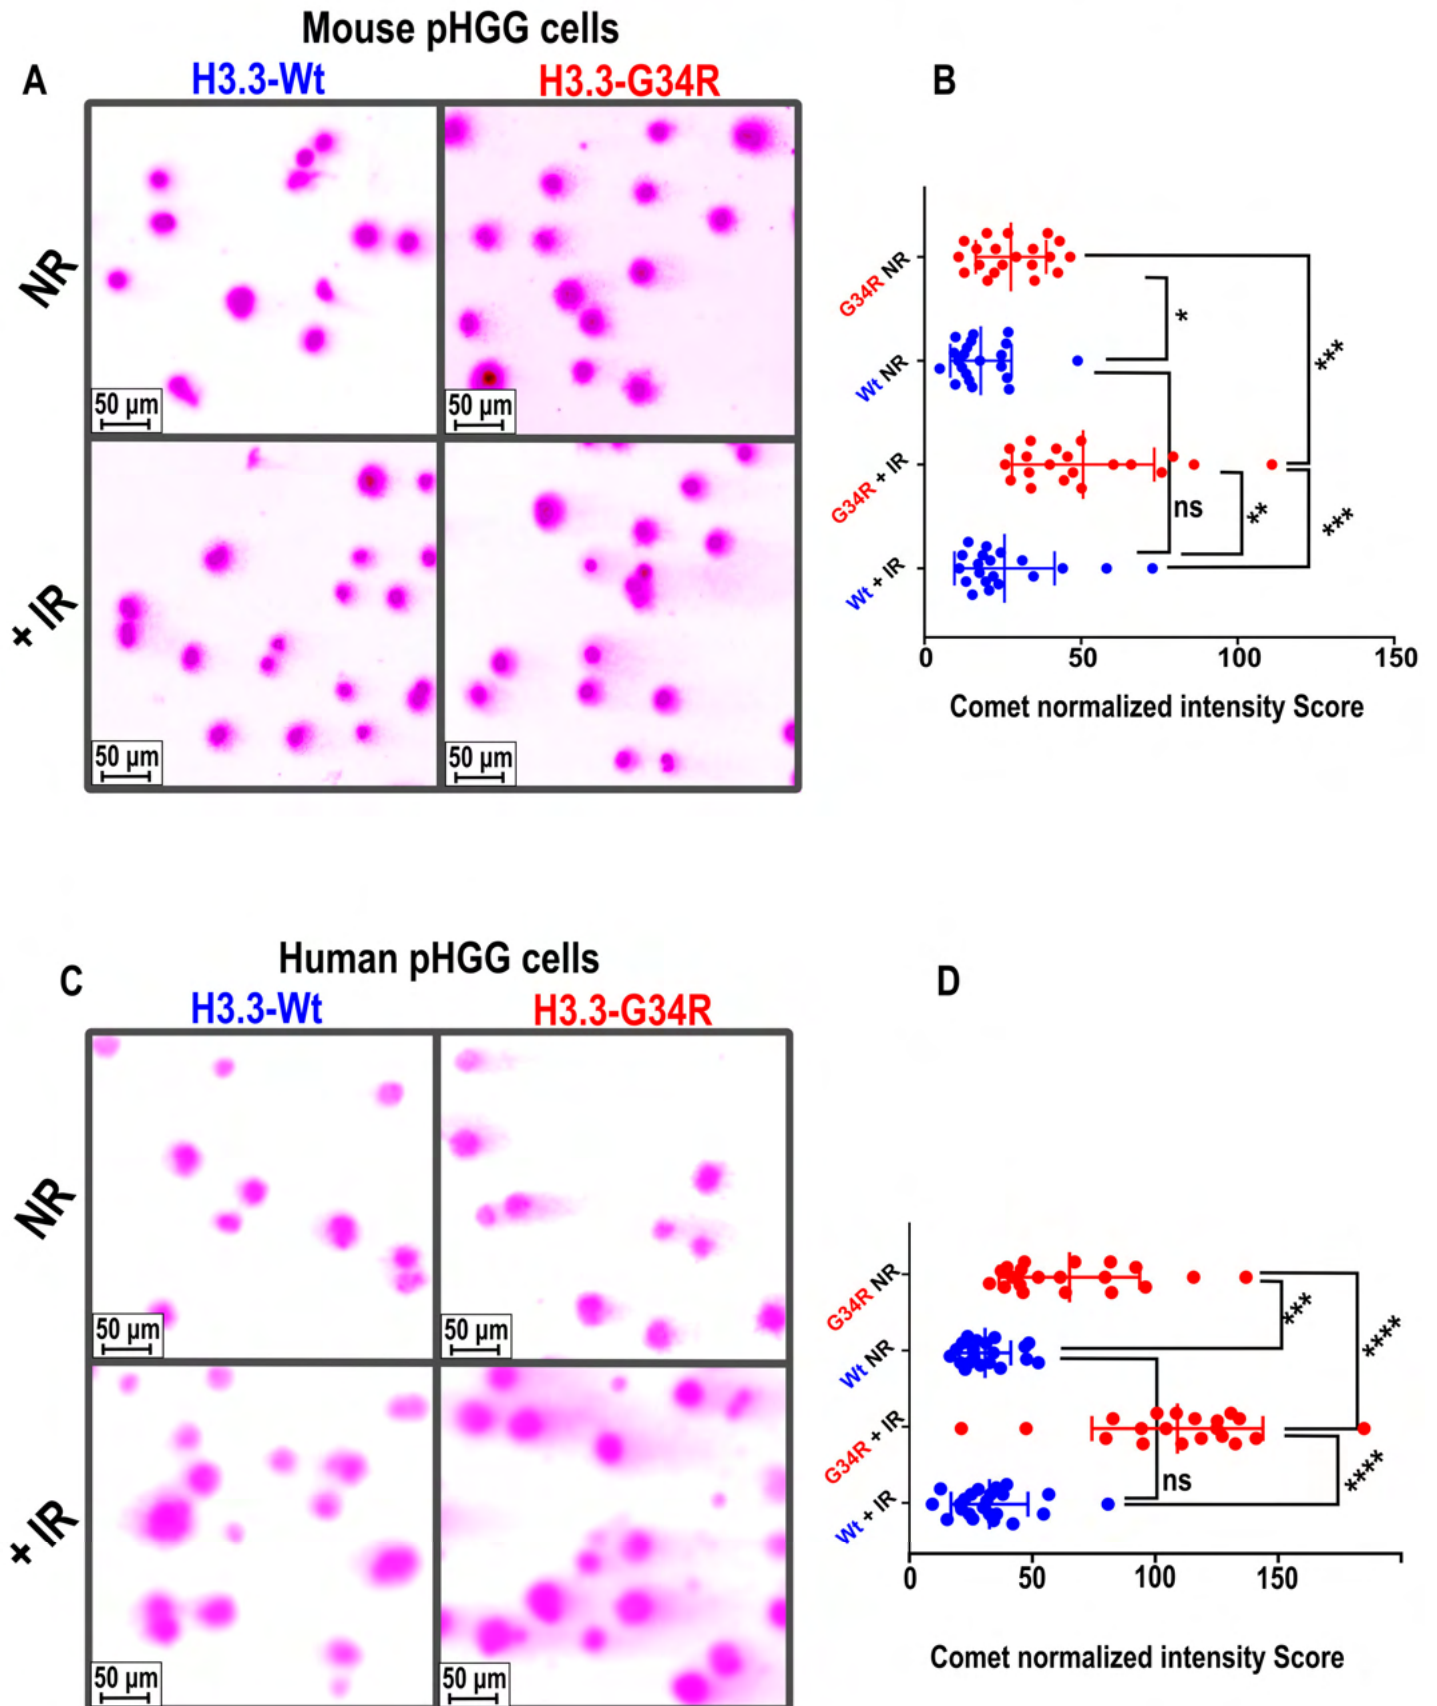

1383 **Figure S18**

1384 Fluorescence microscopy images of neutral comet assays in **A)** mouse and **C)** human  
1385 cells in basal conditions and after ionizing radiation (4 hours post IR, 3 Gy), and  
1386 quantification of the results (**B, D**). (NR=non-irradiated). ( $***p<0.005$ ,  $****p<0.001$ ; *One-*  
1387 *way Anova test (B, D). Data represent the mean of the comet intensity of individual cells*  
1388 *from four different fields of view*).

1389

1390

1391

1392

1393

1394

1395

1396

1397

1398

1399

1400

1401

1402

1403

1404

1405

1406

1407

1408



1434 **Figure S19-A: Expression of DNA repair proteins and posttranslational**  
1435 **modifications (PTMs) levels in H3.3-G34R pHGG. A)** Western blotting of selected DNA  
1436 repair proteins and posttranslational modifications (PTMs) assessing the activation of  
1437 these proteins in human pHGG cells.

1438

1439

1440

1441

1442

1443

1444

1445

1446

1447

1448

1449

1450

1451

1452

1453

1454

1455

1456

1457

1458

1459

1460



## Supplementary Figure 19-B

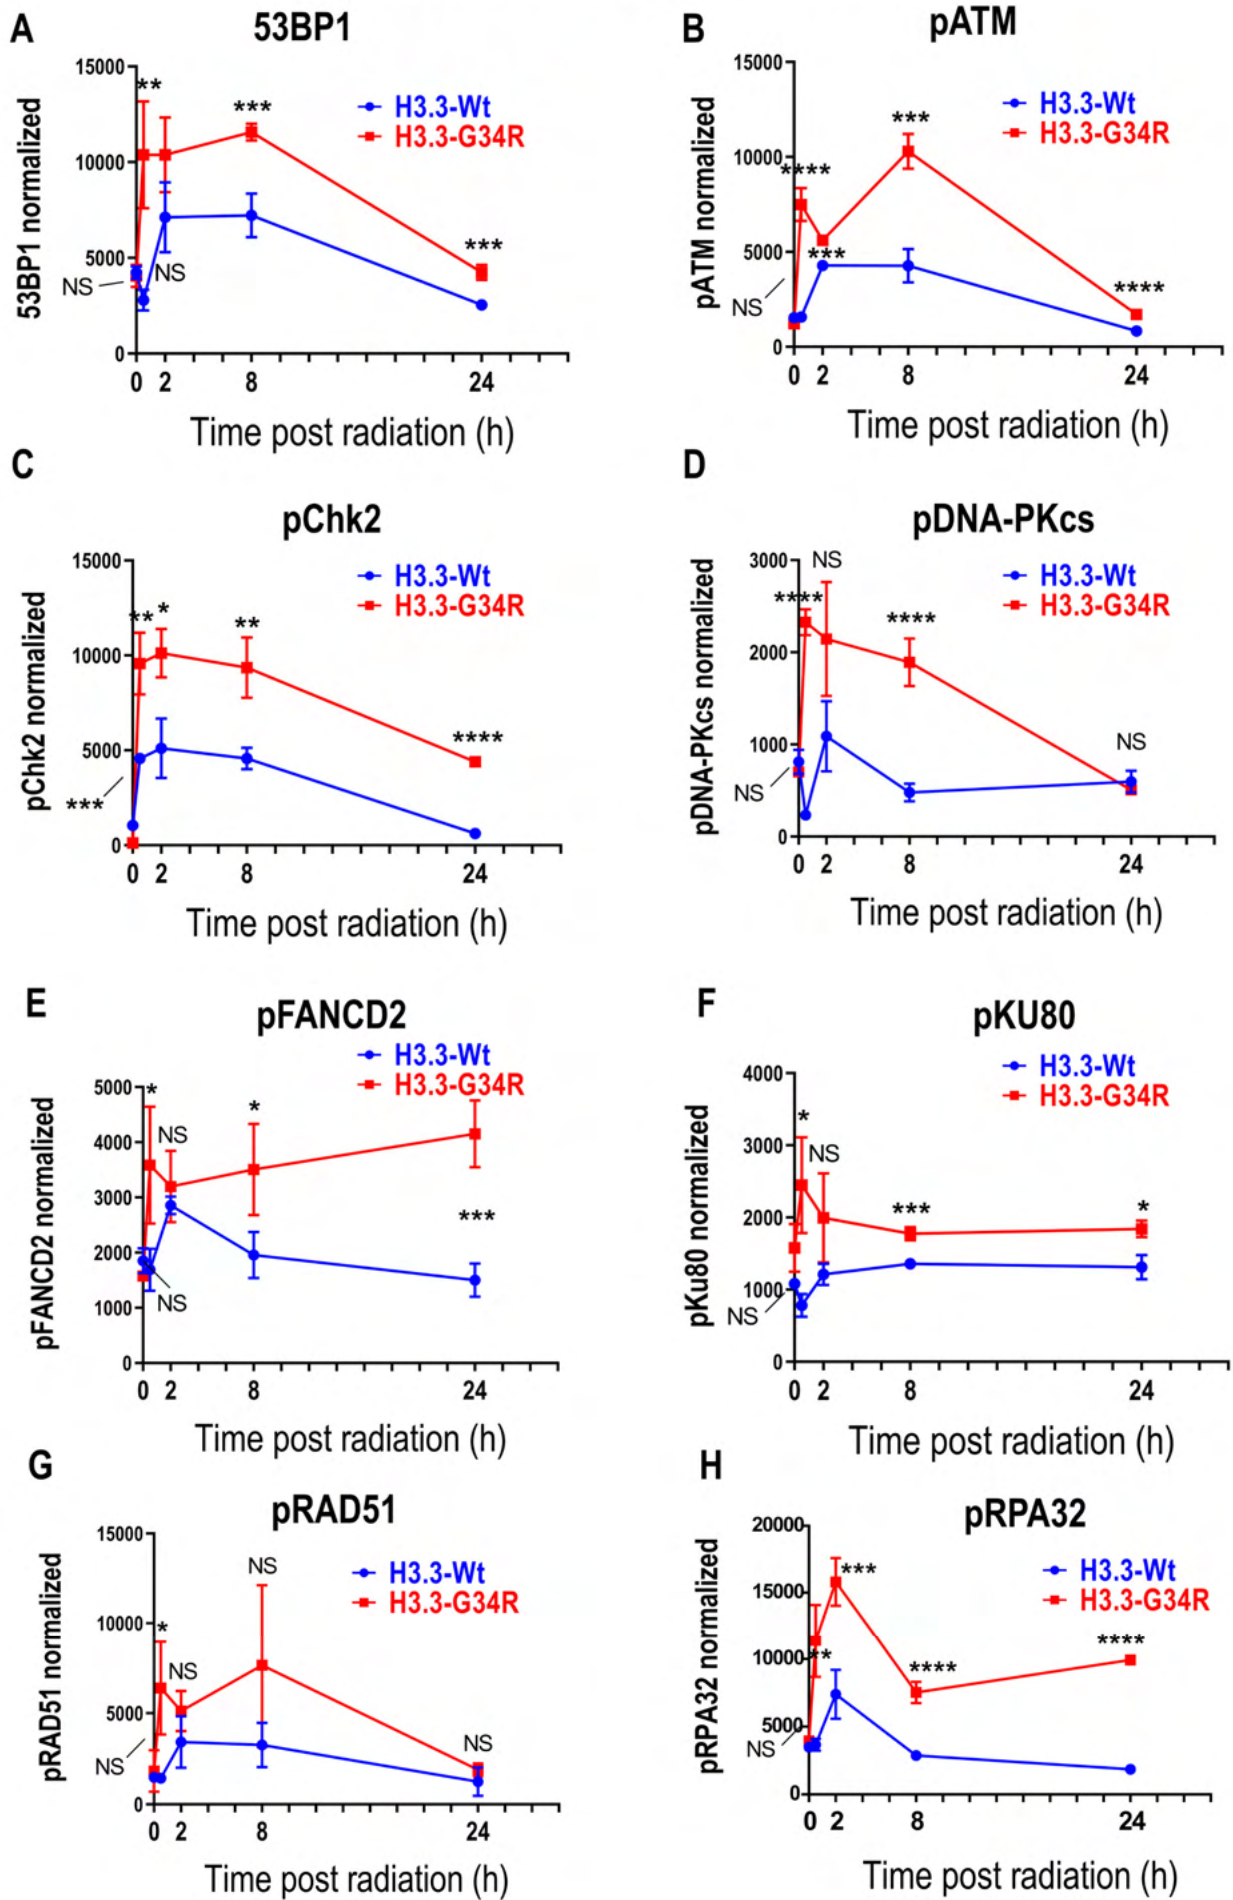

1488 **Figure S19-B: Expression of DNA repair proteins and posttranslational**  
1489 **modifications (PTMs) levels in H3.3-G34R pHGG.** Quantification of Western blot  
1490 results showing normalized levels of ATM-pSer1981 **(C)**, CHK2-pThr68 **(B)** (DNA  
1491 damage sensing/Checkpoint activation), DNA-PKs-pSer2056 **(D)**, Ku80-p, **(F)** total  
1492 53BP1 **(A)** (NHEJ); and RAD51-pThr309 **(G)** RPA32-pSer33 **(H)** and FANCD2-pThr649  
1493 (HR). (\* $p < 0.05$ , \*\* $p < 0.01$ , \*\*\* $p < 0.005$ , \*\*\*\* $p < 0.001$ ; unpaired t test (C-E)). Data represent  
1494 mean  $\pm$  SD. (\* $p < 0.05$ , \*\* $p < 0.01$ , \*\*\* $p < 0.005$ , \*\*\*\* $p < 0.001$ ; unpaired t test (C-E)). The actin  
1495 control is a representative loading of all the protein samples. Data represent mean  $\pm$  SD.  
1496 *N=3 technical replicates)*

1497  
1498  
1499  
1500  
1501  
1502  
1503  
1504  
1505  
1506  
1507  
1508  
1509  
1510  
1511  
1512  
1513



## Supplementary Figure 20

### Cell cycle Chk2 activation in human pHGG upon ionizing radiation

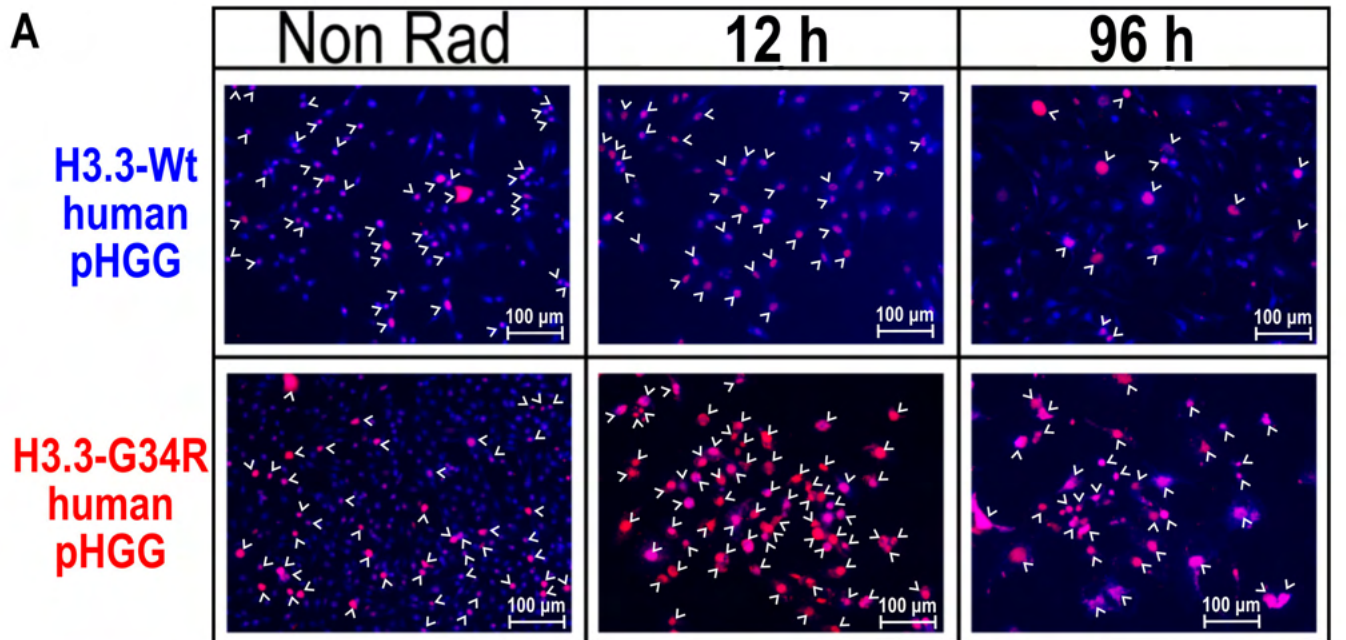

**B**

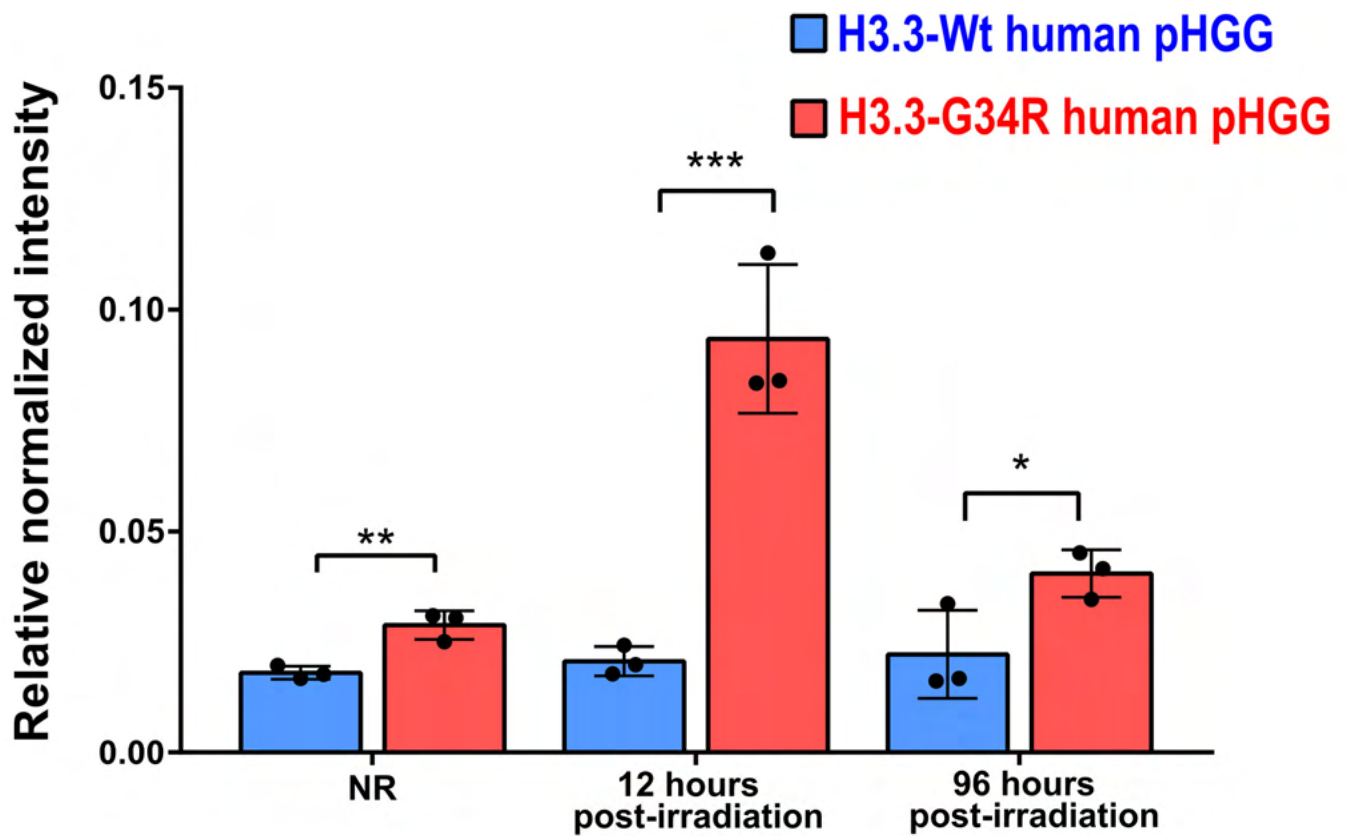

1533 **Figure S20**

1534 **A)** Immunofluorescence for Chk2-phosphoThr68 (in red and nuclei (in blue), assessing  
1535 cell cycle checkpoint 2 activation in response to ionizing radiation (IR) in human H3.3-Wt  
1536 and H3.3-G34R pHGG cells. Arrowheads indicate Chk2-pThr68 positive cells. **B)**  
1537 Quantification and statistical analysis of the results in A). ( $*p<0.05$ ,  $**p<0.01$ ,  $***p<0.005$ ,  
1538  $****p<0.001$ ; unpaired *t* test. Data represent mean  $\pm$  SD of five different field of views).

1539

1540

1541

1542

1543

1544

1545

1546

1547

1548

1549

1550

1551

# Supplementary Figure 21

## A DNA repair pathway and protein/PTM levels [G34R/Wt], mouse model

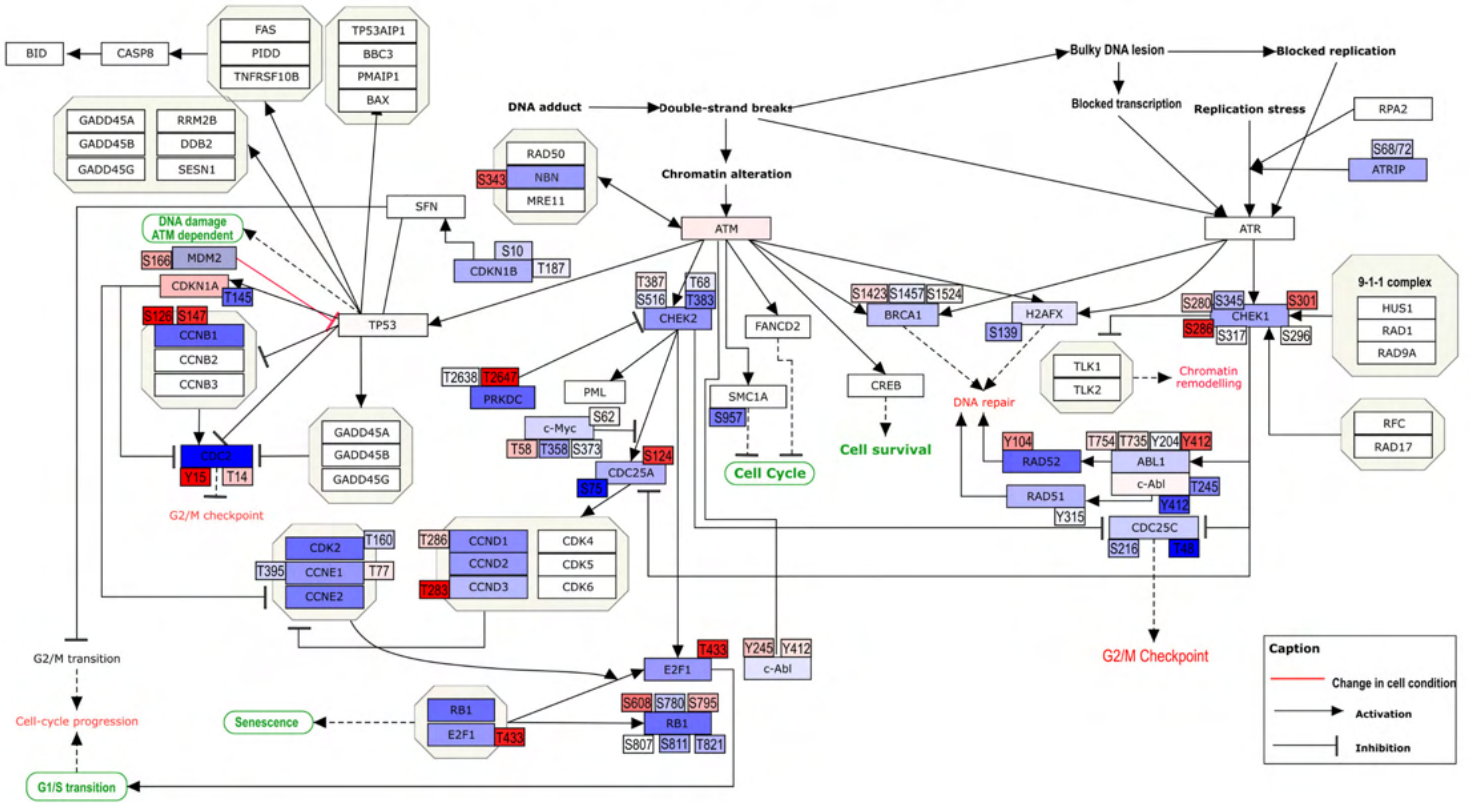

## B DNA repair pathway and protein/PTM levels [G34R/Wt], human model

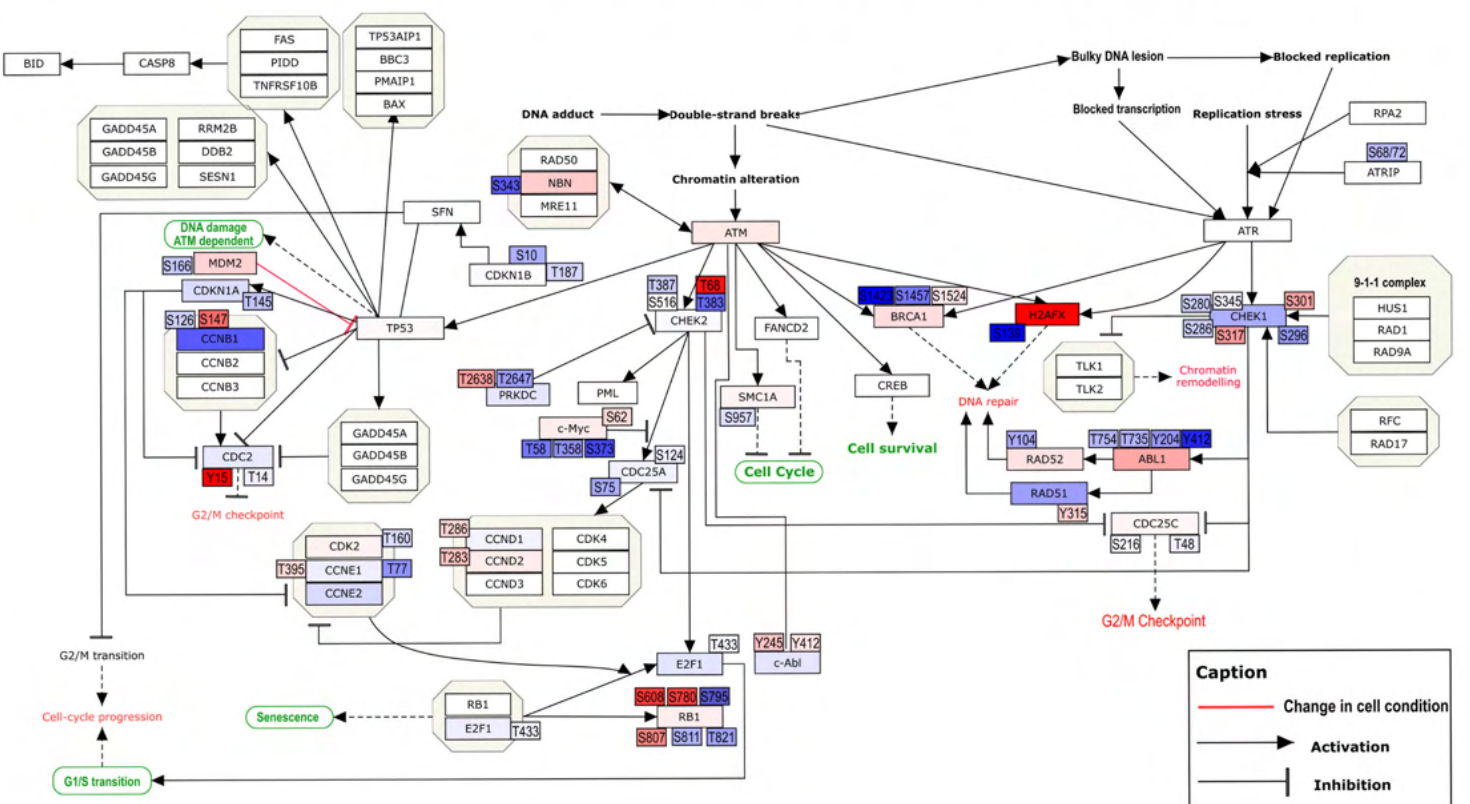

1571 **Figure S21**

1572 **Analysis of DNA repair pathway activity by protein and PTMs levels in mouse and**  
1573 **human pHGG G34R cells. A-B)** Scheme depicting the DNA repair pathway, and the  
1574 results of the array in each protein and PTM in a color code defined by relative expression  
1575 (Fold change) between G34R versus Wt pHGG cells (Blue: downregulated, red:  
1576 upregulated), in the mouse **(A)** and human **(B)** models.

1577

1578

1579

1580

1581

1582

1583

1584

1585

1586

1587

1588

1589

# Supplementary Figure 22

## Response to Temozolomide

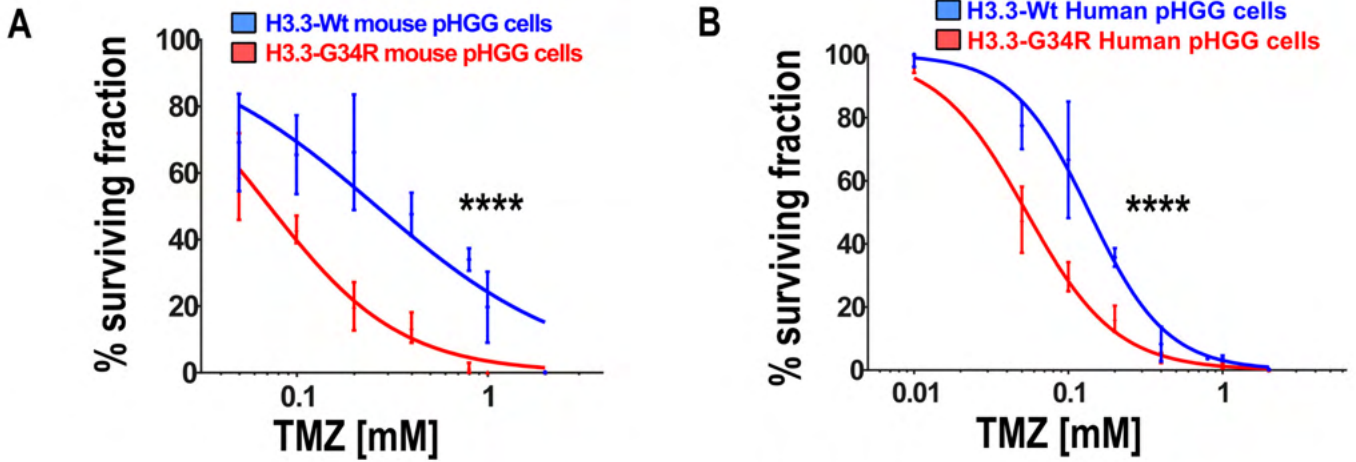

## Dose response to IR and Pamiparib, CDKN2A<sup>-/-</sup> pGG GEMM

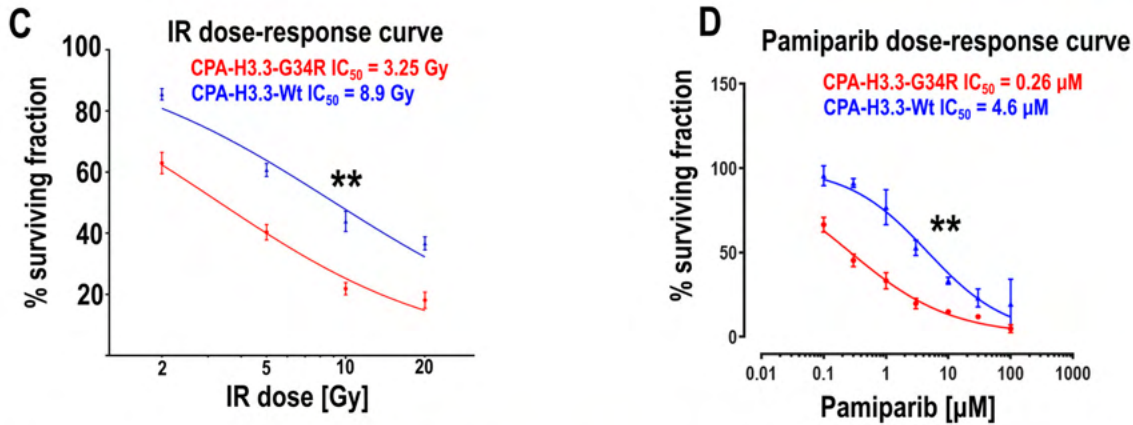

## Dose response to CHK1/2i AZD7762 and PARPi Pamiparib in endogenous H3.3-G34R patient derived cells

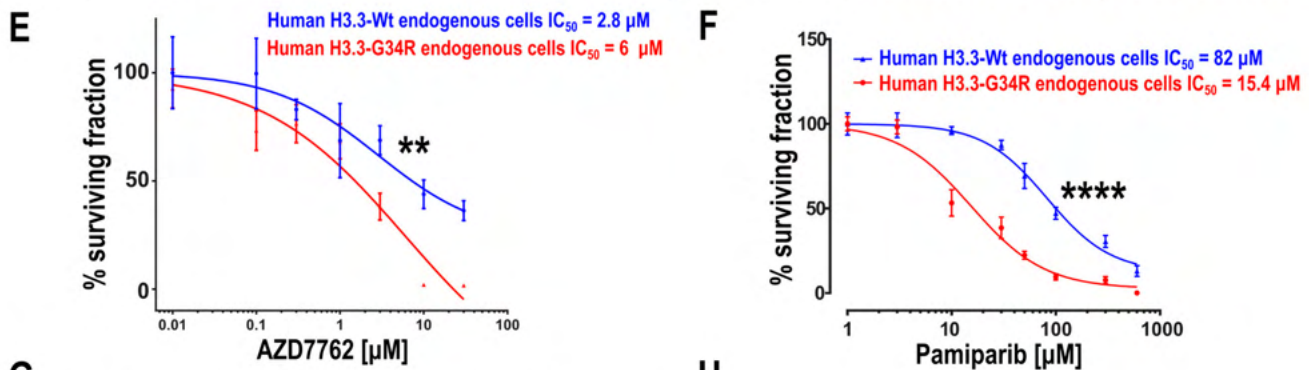

## G Mutation count (pGG patients sequenced in databases)

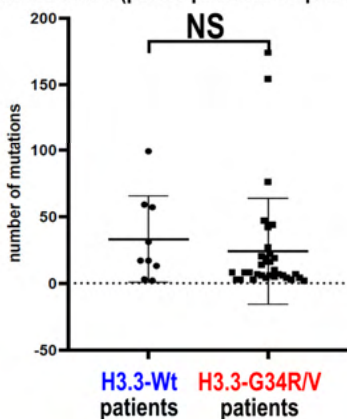

## H Mgmt expression (pGG patients with mRNA data)

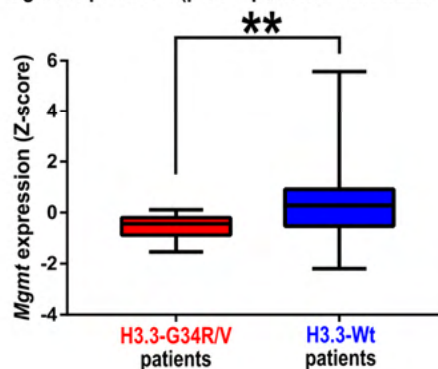



1609 **Figure S22**

1610 **A-B)** Analysis of the response to Temozolomide of H3.3-G34R and H3.3-Wt pHGG  
1611 mouse **(A)** and human **(B)** cells. **C-D)** Analysis of the response to ionizing radiation (IR)  
1612 **(C)** and PARPi pamiparib **(D)** of H3.3-G34R and H3.3-Wt pHGG cells developed using  
1613 an alternative sleeping beauty-based Genetically Engineered Mouse Model (GEMM) of  
1614 pHGG where tumors are induced with CDKN2A<sup>-/-</sup>, and expression of a constitutively  
1615 activated PDGFR $\alpha$  (D842V mutation), and independent of receptor tyrosine kinase  
1616 (RTK)/RAS/PI3K activation. **E-F)** Analysis of the response to cell cycle checkpoint  
1617 inhibitor AZD7762 **(E)** and PARPi pamiparib **(F)** of endogenous H3.3-G34R-mutant and  
1618 endogenous H3.3-Wt pHGG cells. **G)** Comparison of the number of point mutations in  
1619 histone mutant and histone wild type pHGG, from patient databases. **H)** Analysis of  
1620 expression of the *Mgmt* gene in human H3.3-G34R/V patients vs H3.3-Wt patients (From  
1621 PedcBioportal database). (*\*p*<0.05, *\*\*p*<0.01, *\*\*\*p*<0.005, *\*\*\*\*p*<0.001; *analysis of Hill*  
1622 *slope difference in nonlinear sigmoid regression model (A-F); Wilcoxon test (G-H). Data*  
1623 *represent mean  $\pm$  SD of three experimental replicates).*

1624

1625

1626

1627

1628

1629



# Supplementary Figure 23

Clonogenic Assay in response to temozolomide (TMZ) combined with ionizing radiation (IR)

## A Mouse pHGG cells

|          |              | H3.3-G34R |       |      |     | H3.3-Wt |       |      |     |
|----------|--------------|-----------|-------|------|-----|---------|-------|------|-----|
| TMZ [mM] | IR Dose (Gy) | 0         | 0.002 | 0.02 | 0.2 | 0       | 0.002 | 0.02 | 0.2 |
| Non-IR   | (200 cells)  |           |       |      |     |         |       |      |     |

## B Human pHGG cells

|          |              | H3.3-G34R |       |      |     | H3.3-Wt |       |      |     |
|----------|--------------|-----------|-------|------|-----|---------|-------|------|-----|
| TMZ [mM] | IR Dose (Gy) | 0         | 0.002 | 0.02 | 0.2 | 0       | 0.002 | 0.02 | 0.2 |
| Non-IR   | (200 cells)  |           |       |      |     |         |       |      |     |

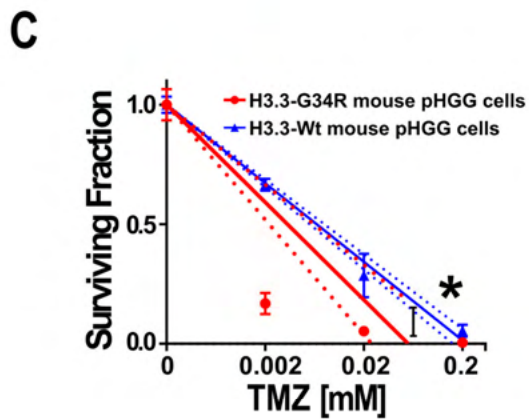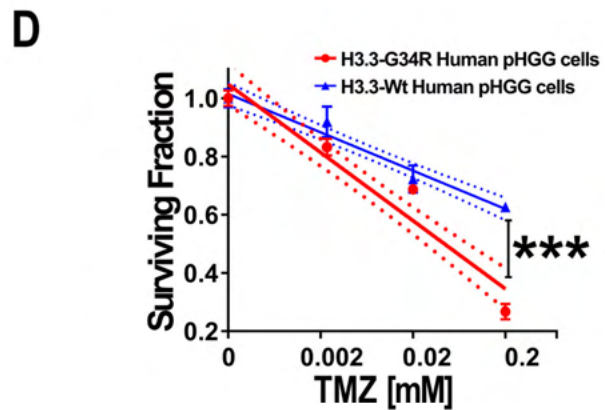

1649 **Figure S23**

1650 **A-B)** Clonogenic assay to assess the response of H3.3-G34R and H3.3-Wt pHGG mouse  
1651 **(A)** and human **(B)** cells to Temozolomide **C-D)** Curves representing the fraction of  
1652 surviving colonies in each condition. (*\*p<0.05, \*\*p<0.01, \*\*\*p<0.005, \*\*\*\*p<0.001; slope*  
1653 *difference in linear regression model. Data represent mean ± SD of three experimental*  
1654 *replicates. The surviving fraction is referred to the non-treated cells (0 mM TMZ).*

1655

1656

1657

1658

1659

1660

1661

1662

1663

1664

1665

1666

1667

# Supplementary Figure 24

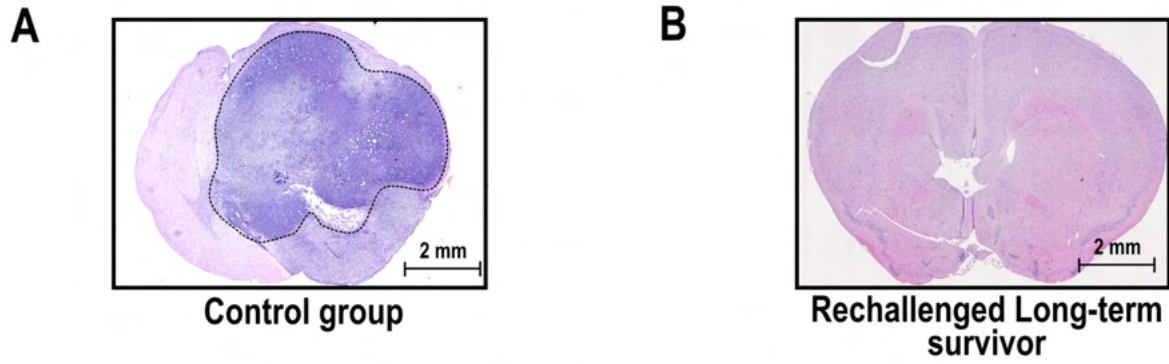

Rechallenge of H3.3-G34R pHGG bearing mice that survived after the RT + DDRi treatment

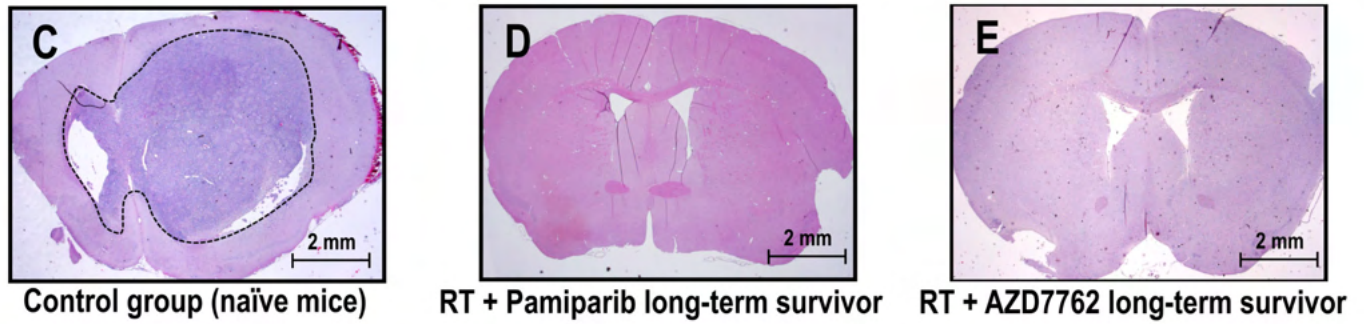

Liver Histology H3.3-G34R pHGG implanted mice

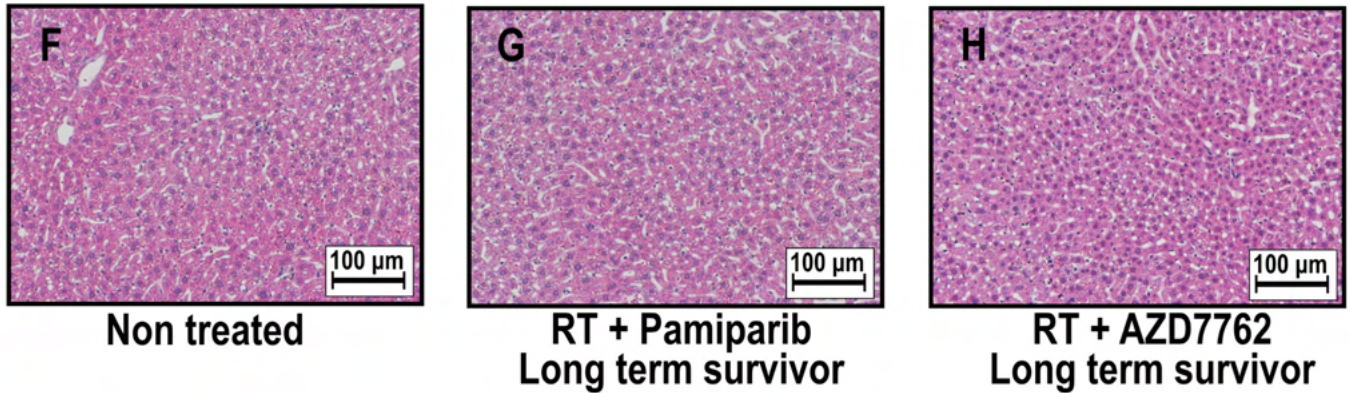

## I Cell Blood Count

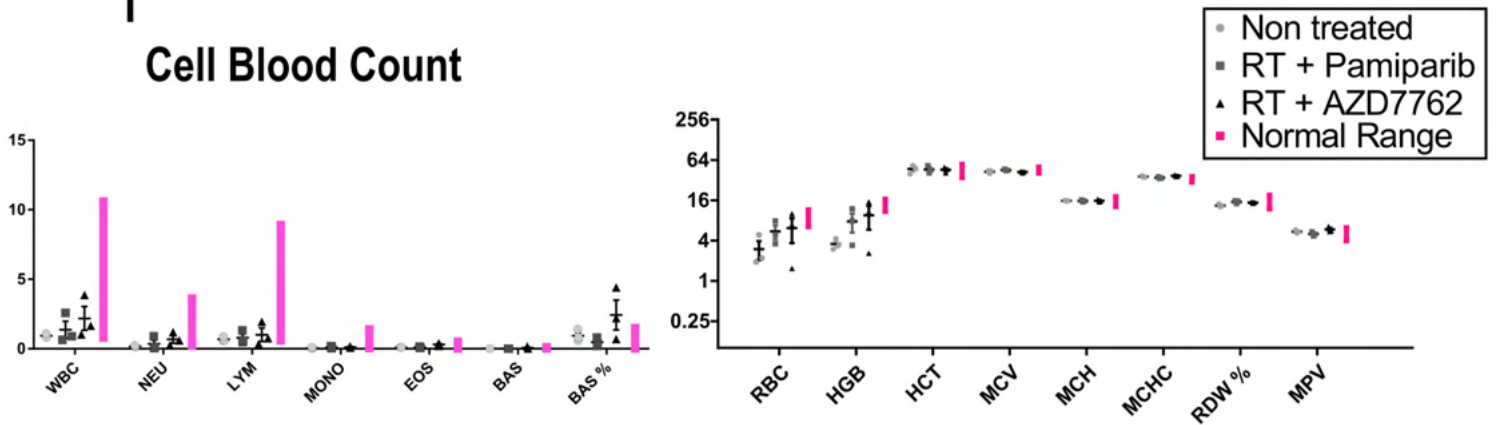

1695 **Figure S24**

1696 **A-B)** Representative Hematoxylin and Eosin stainings of fixed brain sections of A) naïve  
1697 animals (Control group) or B) Long term survivors rechallenged with H3.3-G34R pHGG.  
1698 **C-E)** Representative Hematoxylin and Eosin stainings of D) fixed brain sections of naïve  
1699 animals (Control group) or E-F) long term survivors of RT + DDRi treated-mice  
1700 rechallenged with H3.3-G34R pHGG. **F-H)** Representative Hematoxylin and Eosin  
1701 stainings of fixed liver sections of animals implanted with H3.3-G34R pHGG, without  
1702 treatment or subjected to RT + pamiparib or RT + AZD7762 treatments. **I)** Cell blood  
1703 count of animals implanted with H3.3-G34R pHGG, without treatment or subjected to RT  
1704 + pamiparib or RT + AZD7762 treatments. (WBC= Whole blood count, NEU=  
1705 Neutrophiles, LYM= lymphocytes, MONO= Monocytes, EOS= eosinophiles, BAS=  
1706 Basophiles, RBC = Red blood cells count, HGB= Hemoglobin, HTC= hematocrit, MCV=  
1707 Mean corpuscular volume, MCH= Mean corpuscular hemoglobin, MCHC= mean  
1708 corpuscular hemoglobin concentration, RDW%= red cell distribution width, MPV= Mean  
1709 Platelet Volume.) Normal Ranges for each measure are represented with pink lines.

1710

1711

1712

1713

1714

1715



# Supplementary Figure 25

## A cGAS-STING activation in human pHGG cells

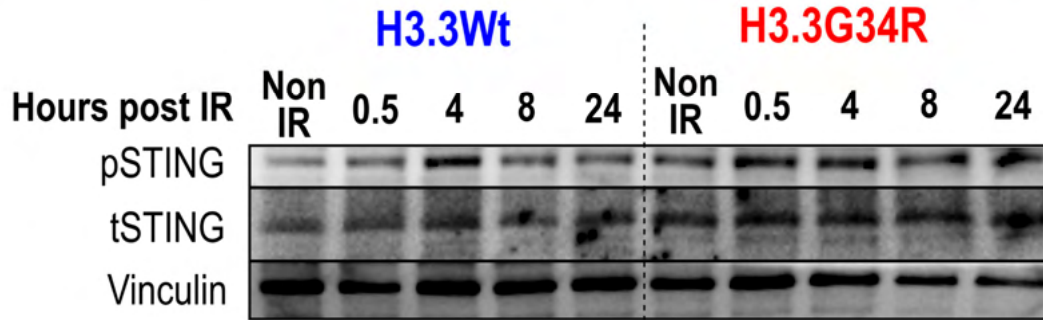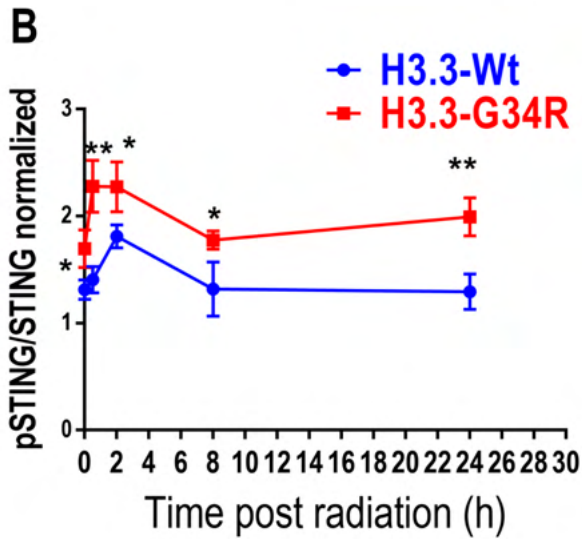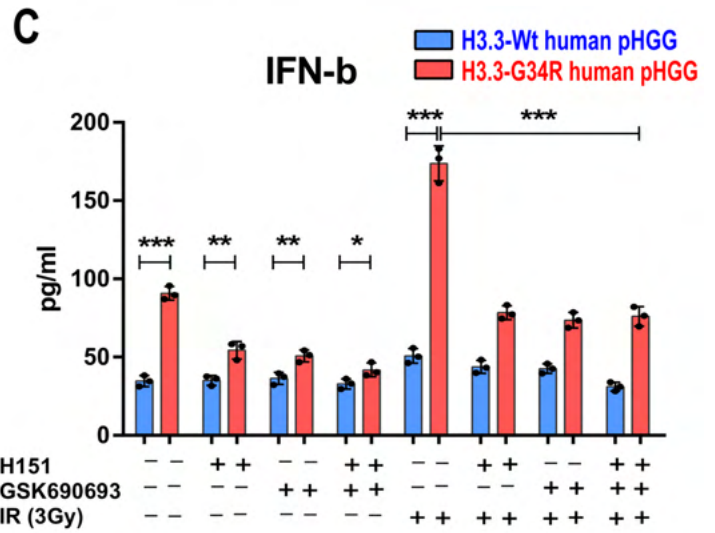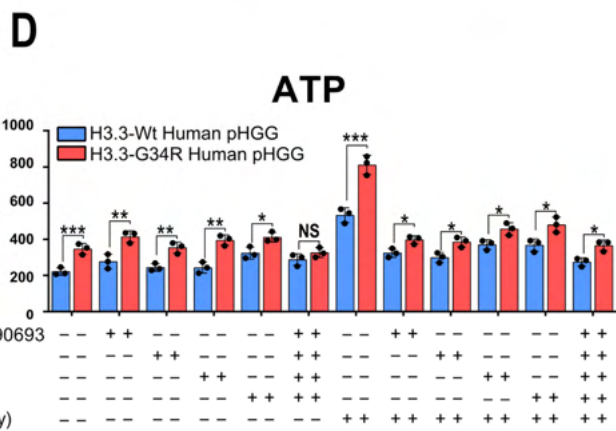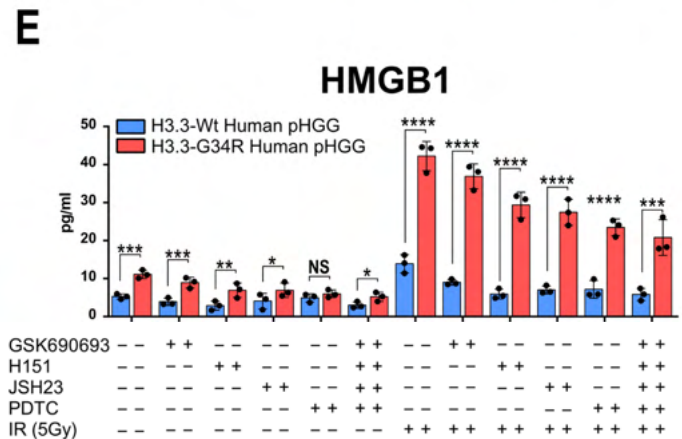

1735 **Figure S25**

1736 **A)** Western blotting depicting STING-pSer365 levels in H3.3-G34R and H3.3-Wt human  
1737 pHGG cells at different times post IR (3 Gy). **B)** Quantification of Western blot results  
1738 represented in A). **C)** Release of interferon-beta (IFN- $\beta$ ) in H3.3-G34R and H3.3-Wt  
1739 mouse cells at different times post IR (3 Gy), and inhibition of IFN- $\beta$  release by STING  
1740 inhibitors GSK690693 and H151. (\* $p < 0.05$ , \*\* $p < 0.01$ , \*\*\* $p < 0.005$ , \*\*\*\* $p < 0.001$ ; unpaired  
1741 t test) **D)** Levels of soluble damage-associated molecular pattern (DAMP) ATP in H3.3-  
1742 G34R and H3.3-Wt mouse cells in response to (3 Gy), and inhibition of cGAS-STING  
1743 pathway with the inhibitors GSK690693, H151, JSH23 and PDTTC. (\* $p < 0.05$ , \*\* $p < 0.01$ ,  
1744 \*\*\* $p < 0.005$ , \*\*\*\* $p < 0.001$ ; unpaired t test. **E)** Levels of soluble damage-associated  
1745 molecular pattern (DAMP) HMGB1 in H3.3-G34R and H3.3-Wt mouse cells in response  
1746 to (3 Gy), and inhibition of cGAS-STING pathway with: GSK690693 STING-dependent  
1747 IRF3 activation inhibitor; H151, STING inhibitor; JSH23, NF- $\kappa$ B activation inhibitor; and  
1748 PDTTC, NF- $\kappa$ B inhibitor. (\* $p < 0.05$ , \*\* $p < 0.01$ , \*\*\* $p < 0.005$ , \*\*\*\* $p < 0.001$ ; unpaired t test. Data  
1749 represent mean  $\pm$  SD of three experimental replicates).

1750

1751

1752

1753

1754

1755



# Supplementary Figure 26

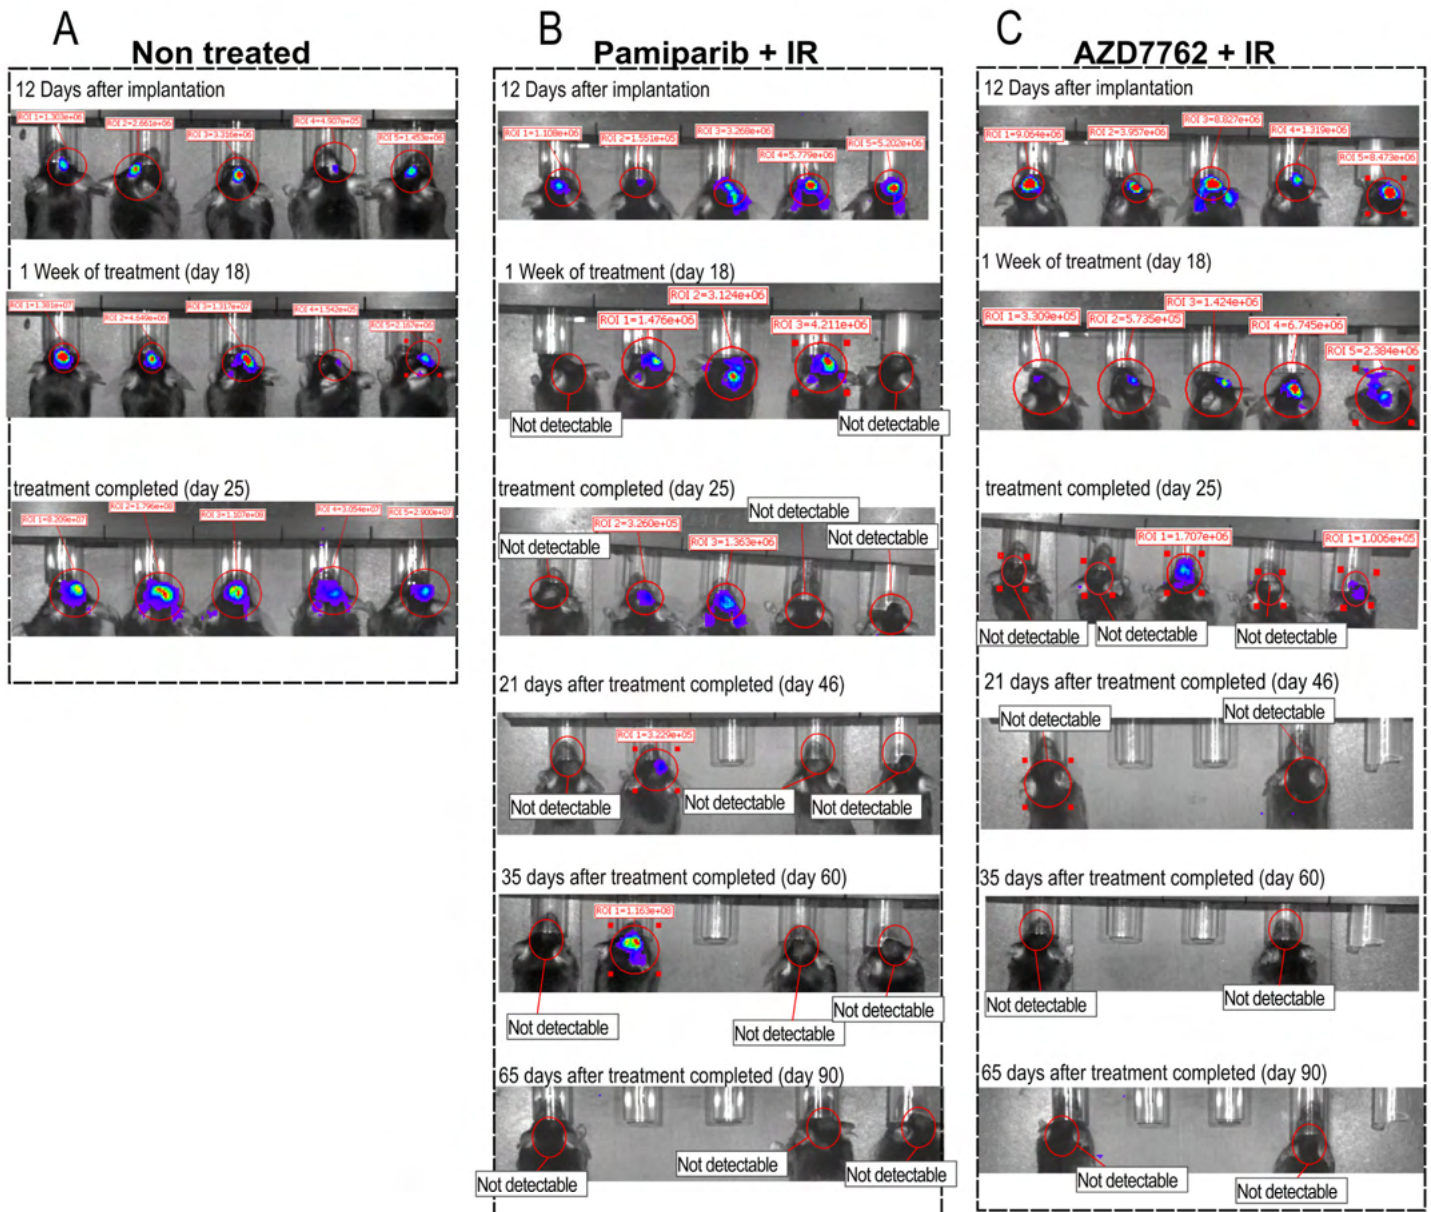

1775 **Figure S26**

1776 **A)** Bioluminescence (BLI) monitoring of the progression of H3.3-G34R pHGG in non-  
1777 treated mice, and mice treated with pamiparib (PARP inhibitor) + RT or AZD7762 (cell  
1778 cycle checkpoint inhibitor) + RT.

1779

1780

1781

1782

1783

1784

1785

1786

1787

1788

1789

1790

1791

1792

1793

# Supplementary Figure 27

A

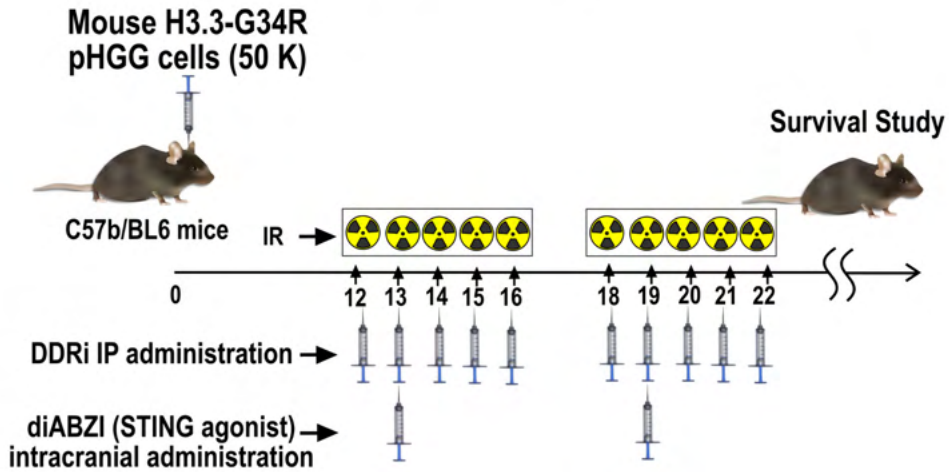

B

Mouse bearing H3.3-G34R pHGG treated with RT, Chki AZD7762 and cGAS-STING agonist diABZI

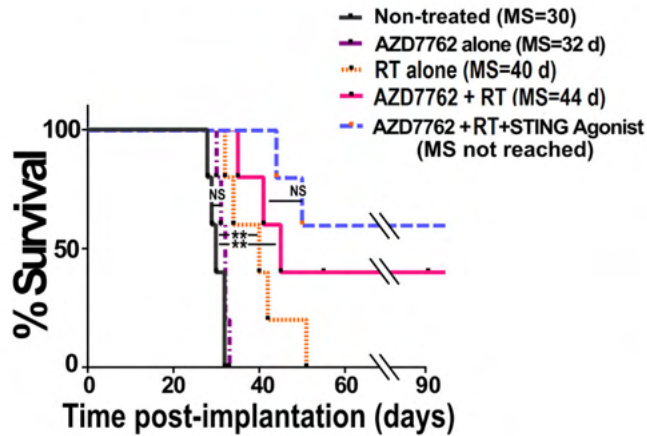

C

Mouse bearing H3.3-G34R pHGG treated with RT, Pamiparib, and cGAS-STING agonist diABZI

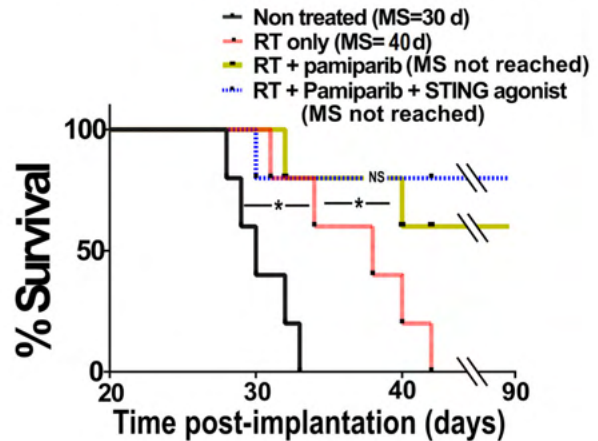

D

Rechallenge of H3.3-G34R pHGG-implanted mice that survived long-term after treatment with cGAS-STING agonist diABZI

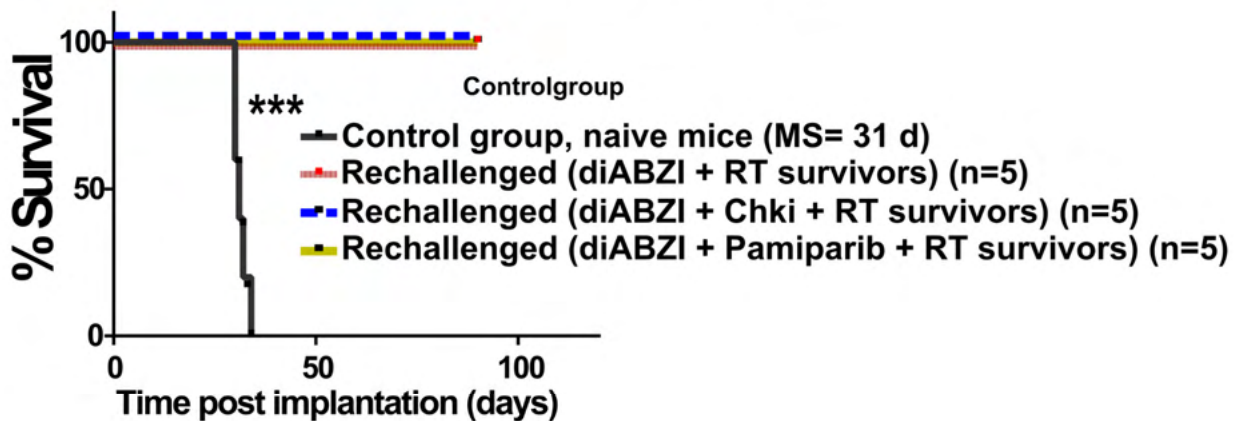

1822 **Figure S27**

1823 **A)** Illustration depicting the time frame of the combined treatment with DDRi, RT and the  
1824 STING agonist diABZI. **B)** Survival of H3.3-G34R-bearing mice treated with RT alone or  
1825 in combination with the cell cycle checkpoint inhibitor AZD7762 and with the STING  
1826 agonist diABZI. **C)** Survival of H3.3-G34R-bearing mice treated with RT alone or in  
1827 combination with the PARP inhibitor pamiparib and with the STING agonist diABZI.  
1828 *Please note that the non-treated and RT experimental groups shown in B) and C) were*  
1829 *included in the same experiment as shown in Figure 8, H. D)* Kaplan-Meier survival plot  
1830 of H3.3-G34R-bearing mice that survived due to the radiotherapy (RT) + DNA damage  
1831 response inhibitor (DDRi) therapies and rechallenged with H3.3-G34R pHGG cells,  
1832 compared to naïve mice implanted with the same cells (Control group). (*N=5 mice/group;*  
1833 *data were analyzed using the log-rank (Mantel-Cox) test.*)

1834

1835

1836

1837

1838

1839

1840

1841

1842

1843

1844

1845

1846

# Supplementary Figure 28

**A**

| Model                              | H3.3-Wt                            |                                    | H3.3-G34R                          |                                    |
|------------------------------------|------------------------------------|------------------------------------|------------------------------------|------------------------------------|
|                                    | Pamiparib<br>IC <sub>50</sub> (μM) | Veliparib<br>IC <sub>50</sub> (μM) | Pamiparib<br>IC <sub>50</sub> (μM) | Veliparib<br>IC <sub>50</sub> (μM) |
| Mouse cells                        | 60.1                               | 303.4                              | 22.5                               | 121.6                              |
| Human genetically engineered cells | 87.5                               | 175.3                              | 31.1                               | 86.23                              |
| Human endogenous-mutant cells      | 82                                 | 181                                | 15.4                               | 109.6                              |

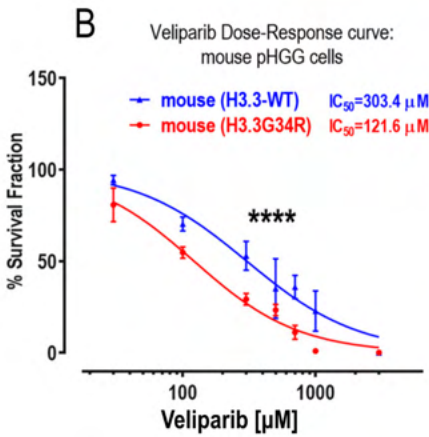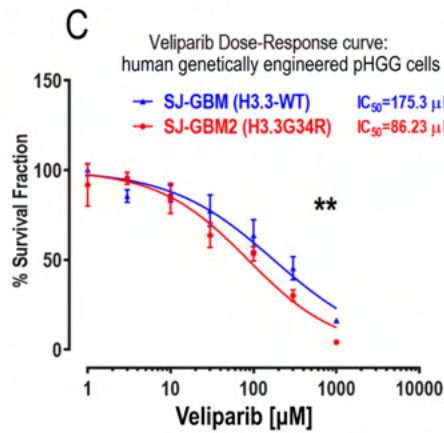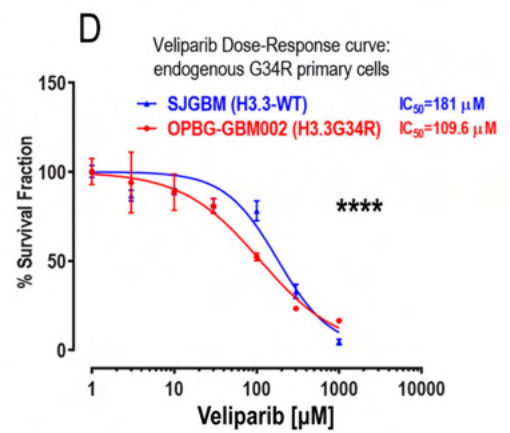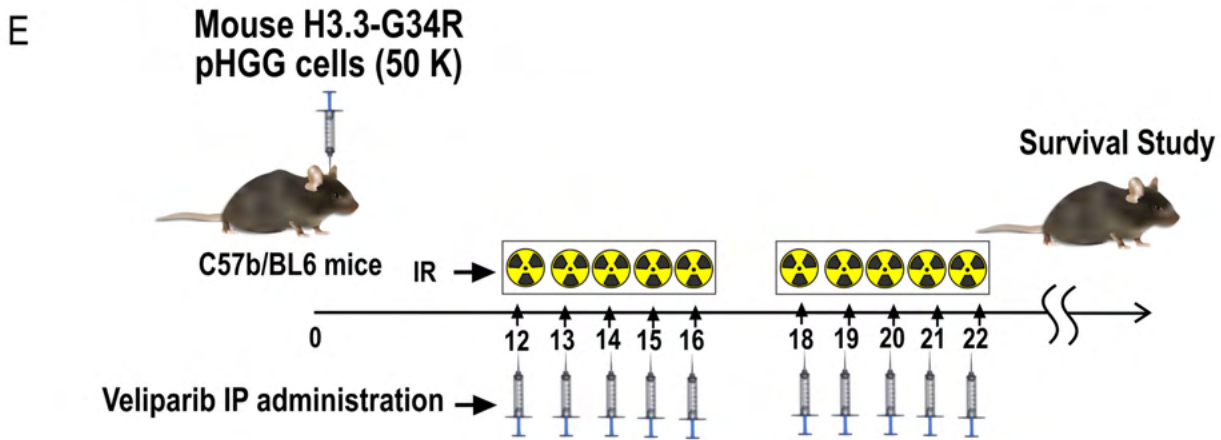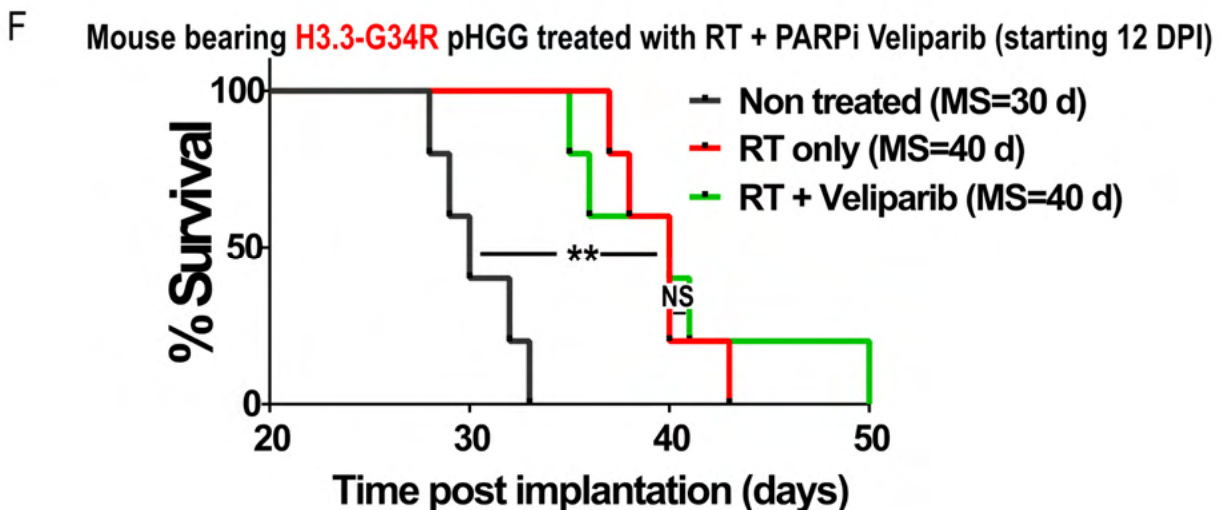



1866 **A.** IC<sub>50</sub> for Pamiparib and veliparib in different models. **B-D.** Dose-response curves of  
1867 H3.3-G34R and H3.3-Wt mouse (**B**), genetically engineered human pHGG cells (**C**), and  
1868 patient-derived endogenous G34R-mutant and H3.3-Wt cells (**D**) in response to the PARP  
1869 inhibitor veliparib. **E**) Illustration depicting the time frame of the combined treatment with  
1870 veliparib and RT. **F**) Survival of H3.3-G34R-pHGG bearing mice treated with RT alone or  
1871 in combination with the PARP inhibitor veliparib. (*N=5 mice/group; data were analyzed*  
1872 *using the log-rank (Mantel-Cox) test.*)

1873  
1874  
1875  
1876  
1877  
1878  
1879  
1880  
1881  
1882  
1883  
1884  
1885  
1886  
1887  
1888  
1889  
1890  
1891  
1892

## Cell used in the study

|                                                             | Genetic markers                                         | Source                                                                                                         | Availability                                                                             |
|-------------------------------------------------------------|---------------------------------------------------------|----------------------------------------------------------------------------------------------------------------|------------------------------------------------------------------------------------------|
| Mouse primary cells                                         |                                                         |                                                                                                                |                                                                                          |
| Mouse H3.3-Wt pHGG cells                                    | P53 kd, ATRX kd, NRAS-G12V                              | This study                                                                                                     | Upon request to MGC                                                                      |
| Mouse H3.3-G34R pHGG cells                                  | P53 kd, ATRX kd, NRAS-G12V, H3.3-G34R                   | This study                                                                                                     | Upon request to MGC                                                                      |
| Mouse CDKN2a -/-, PDGFR $\alpha$ D842V H3.3-Wt pHGG cells   | CDKN2a -/-, PDGFR $\alpha$ D842V, P53 kd, ATRX kd       | This study                                                                                                     | Upon request to MGC                                                                      |
| Mouse CDKN2a -/-, PDGFR $\alpha$ D842V H3.3-G34R pHGG cells | CDKN2a -/-, PDGFR $\alpha$ D842V, P53 kd, ATRX kd       | This study                                                                                                     | Upon request to MGC                                                                      |
|                                                             |                                                         |                                                                                                                |                                                                                          |
| Human primary cells                                         |                                                         |                                                                                                                |                                                                                          |
| SJ-GBM2                                                     | P53 lof mut, ATRX lof mut.                              |                                                                                                                | Children's Oncology Group (COG) Repository, Health Science Center, Texas Tech University |
| SJ-GBM2-H3.3-Wt (Human H3.3-Wt pHGG cells)                  | P53 lof mut, ATRX lof mut, H3.3-Wt ectopic expression   | This study                                                                                                     | Upon request to MGC                                                                      |
| SJ-GBM2-H3.3G-34R                                           | P53 lof mut, ATRX lof mut, H3.3-G34R ectopic expression | This study                                                                                                     | Upon request to MGC                                                                      |
|                                                             |                                                         |                                                                                                                |                                                                                          |
| OPBG-GBM-001                                                | H3.3-G34R                                               | MV, Department of Onco-Haematology, Gene and Cell Therapy, Bambino Gesù Children's Hospital-IRCCS, Rome, Italy | MV                                                                                       |
| HSJD-GBM-002                                                | H3.3-G34R                                               | AMC, Institut de Recerca Sant Joan de Deu, Barcelona, 08950, Spain                                             | AMC                                                                                      |

## **Description of supplementary materials:**

**Table S1:** Normalized counts of RNA-seq analysis comparing mouse H3.3-G34R vs H3.3-Wt mouse pHGG cells.

**Table S2:** Full Differential expression analysis results from mouse H3.3-G34R vs H3.3-Wt mouse pHGG cells RNA-seq.

**Table S3:** Full Differential expression analysis results from human H3.3-G34R vs H3.3-Wt mouse pHGG cells RNA-seq.

**Table S4:** List of H3.3-G34R/V and H3.3-Wt hemispherical pHGG patients' samples selected from PedcBioPortal, to perform RNA-seq, mutation count and copy number alteration analyses.

**Table S5:** Analysis of Differential expression of DNA repair GO genes comparing H3.3-G34R/V versus H3.3-Wt hemispherical pHGG patients' samples selected from PedcBioPortal.

**Table S6:** List of primers used in the study.

**Table S7:** List of reagents used in the study.

**Table S8:** List of antibodies used in the study.

**Table S9:** Full statistical analysis of Tumor initiating cell frequency presented in Figure, 4 G-H. (\* $p < 0.05$ , \*\* $p < 0.01$ , \*\*\* $p < 0.005$ , \*\*\*\* $p < 0.001$ ; analysis of median survival from Kaplan–Meier model).pl

**Table S10:** Full differential expression results of DNA damage response/Cell cycle phospho-array comparing human H3.3-G34R vs H3.3-wt pHGG cells

**Table S11:** Full differential expression results of DNA damage response/Cell cycle phospho-array comparing mouse H3.3-G34R vs H3.3-wt pHGG cells

**Table 4. List of H3.3-G34R and H3.3-WT patients**

H3.3-G34R/V Patients

| Study                | Sample             |
|----------------------|--------------------|
| phgg_cbttc           | 7316-1099-T-353730 |
| pnet_cbttc           | 7316-1105-T-353821 |
| pnet_cbttc           | 7316-158-T         |
| phgg_cbttc           | 7316-2561-T-460404 |
| phgg_herby           | HERBY_005          |
| phgg_herby           | HERBY_011          |
| phgg_herby           | HERBY_020          |
| phgg_herby           | HERBY_021          |
| phgg_herby           | HERBY_026          |
| phgg_herby           | HERBY_036          |
| phgg_herby           | HERBY_055          |
| phgg_herby           | HERBY_111          |
| lgg_tcg              | TCGA-HT-7469-01    |
| phgg_jones_meta_2017 | pHGG_META_0158     |
| phgg_jones_meta_2017 | pHGG_META_0179     |
| phgg_jones_meta_2017 | pHGG_META_0182     |
| phgg_jones_meta_2017 | pHGG_META_0183     |
| phgg_jones_meta_2017 | pHGG_META_0203     |
| phgg_jones_meta_2017 | pHGG_META_0399     |
| phgg_jones_meta_2017 | pHGG_META_0434     |
| phgg_jones_meta_2017 | pHGG_META_0437     |
| phgg_jones_meta_2017 | pHGG_META_0448     |
| phgg_jones_meta_2017 | pHGG_META_0483     |
| phgg_jones_meta_2017 | pHGG_META_0522     |
| phgg_jones_meta_2017 | pHGG_META_0539     |
| phgg_jones_meta_2017 | pHGG_META_0541     |
| phgg_jones_meta_2017 | pHGG_META_0549     |
| phgg_jones_meta_2017 | pHGG_META_0576     |
| phgg_jones_meta_2017 | pHGG_META_0590     |
| phgg_jones_meta_2017 | pHGG_META_0829     |
| phgg_jones_meta_2017 | pHGG_META_1019     |
| phgg_jones_meta_2017 | pHGG_META_1020     |
| phgg_jones_meta_2017 | pHGG_META_1023     |

Wt patients (Hemispheric, ATRXmut, P53mut)

| Study                | Sample         |
|----------------------|----------------|
| phgg_cbttc           | PT_3CHB9PK5    |
| phgg_cbttc           | PT_2WVW55DA    |
| phgg_cbttc           | PT_2WVW55DA    |
| phgg_herby           | HERBY_013      |
| phgg_herby           | HERBY_014      |
| phgg_herby           | HERBY_024      |
| phgg_herby           | HERBY_039      |
| phgg_herby           | HERBY_102      |
| lgg_tcga             | TCGA-DU-5852   |
| phgg_jones_meta_2017 | pHGG_META_0181 |
| phgg_jones_meta_2017 | pHGG_META_0455 |
| phgg_jones_meta_2017 | pHGG_META_1001 |

**Table 9. Statistical analysis of tumor initiating cell experiment**

Tumor initiating frequency: statistical analysis of median survival

| <b>Mouse-H3.3G34R</b> |       |      |      |      |      |      |      |      |
|-----------------------|-------|------|------|------|------|------|------|------|
| Cells implanted       | 100 K | 30 K | 10 K | 3 K  | 1 K  | 300  | 100  | 30   |
| 100 K                 |       | **   | ***  | **** | **** | **** | **** | **** |
| 30 K                  | **    |      | ns   | ns   | **   | **   | **   | **   |
| 10 K                  | ***   | ns   |      | ns   | ns   | ns   | *    | *    |
| 3 K                   | ****  | ns   | ns   |      | ns   | ns   | *    | *    |
| 1 K                   | ****  | **   | ns   | ns   |      | ns   | *    | *    |
| 300                   | ****  | **   | ns   | ns   | ns   |      | ns   | ns   |
| 100                   | ****  | **   | *    | *    | *    | ns   |      | ns   |
| 30                    | ****  | **   | *    | *    | *    | ns   | ns   |      |

| <b>Mouse-H3.3-Wt</b> |       |      |      |      |      |      |      |      |
|----------------------|-------|------|------|------|------|------|------|------|
| Cells implanted      | 100 K | 30 K | 10 K | 3 K  | 1 K  | 300  | 100  | 30   |
| 100 K                |       | **   | **** | **** | **** | **** | **** | **** |
| 30 K                 | **    |      | **** | **** | **** | **** | **** | **** |
| 10 K                 | ****  | **** |      | **** | **** | **** | **** | **** |
| 3 K                  | ****  | **** | **** |      | **   | **   | **   | **   |
| 1 K                  | ****  | **** | **** | **   |      | *    | **   | **   |
| 300                  | ****  | **** | **** | **   | *    |      | ns   | ns   |
| 100                  | ****  | **** | **** | **   | **   | ns   |      | ns   |
| 30                   | ****  | **** | **** | **   | **   | ns   | ns   |      |
